# Supplementary material for: Revised conceptual model of the Solfatara magmatic-hydrothermal system (Campi Flegrei, Italy), time changes during the last 40 years, and prediction of future scenarios
Source: Copernicus journal article supplement (doi:10.5194/egusphere-2024-1306), 2024-05-22
Supplement: Supplementary file 1 [file Supplement.xls]

## Sheet: Title page
Revised conceptual model of the Solfatara magmatic-hydrothermal system (Campi Flegrei, Italy), time changes during the last 40 years, and prediction of future scenarios
Luigi Marini1, Claudia Principe2,3, Matteo Lelli2,4
1 STEAM srl, Pisa, I-56121, Italy
2 CNR, Istituto di Geoscienze e Georisorse, Pisa, I-56124, Italy
3 INGV - Istituto Nazionale di Geofisica e Vulcanologia, Osservatorio Vesuviano, Napoli, I-80124, Italy
4 INGV - Istituto Nazionale di Geofisica e Vulcanologia, Sezione di Pisa, Pisa, I-56125, Italy
Correspondence to: Matteo Lelli (m.lelli@igg.cnr.it)

## Sheet: Table S1
Fumarole	Date	T (°C)	H2O (mmol/mol)	CO2 (mmol/mol)	H2S (mmol/mol)	Ar (mmol/mol)	N2 (mmol/mol)	CH4 (mmol/mol)	H2 (mmol/mol)	He (mmol/mol)	CO (mmol/mol)	x CO2	alpha(RWG)	beta(SS4)	T RWG 21% NaCl	P (bar) RWG 21% NaCl	Possible T SS4 21% NaCl	Possible T SS4 21% NaCl	T SS4 21% NaCl	Possible P (bar) SS4 21% NaCl	Possible P (bar) SS4 21% NaCl	P (bar) SS4 21% NaCl	corr log(H2S/CO2)-4*log(H2/H2O)	T H2S-CO2 (°C)	P (bar) H2S-CO2	log K* H2S-CH4	CH4 (umol/mol)
BG	1983-06-12	n.m.	840700	157100	1663	n.a.	303	23.9	245	n.a.	n.a.	0.157446	#VALUE!	10.3241			263.677	116.454	263.677	50.8673	2.06044	50.8673	11.5941	698.231	1444.41	5.42773	0.00621106
BG	1983-07-14	n.m.	839000	158700	1739	n.a.	n.a.	n.a.	n.a.	n.a.	n.a.	0.159066	#VALUE!	#VALUE!					nn
BG	1983-08-18	157	844000	154000	1730	n.a.	343	28.2	240	n.a.	0.551	0.154309	-1.90024	10.4473	246.948	38.5308	254.703	76.7081	254.703	43.8448	1.08095	43.8448	11.5656	701.358	1451.83	5.42838	0.00645163
BG	1983-09-11	157	840000	158000	1810	n.a.	336	26.7	258	n.a.	0.64	0.158317	-1.87982	10.2785	249.327	40.2958	267.204	131.205	267.204	53.8324	2.60747	53.8324	11.5077	706.796	1481	5.42949	0.00673265
BG	1983-10-04	157	844000	153700	1700	n.a.	343	25	240	n.a.	n.a.	0.154054	#VALUE!	10.3958			258.362	91.8744	258.362	46.5255	1.41498	46.5255	11.6231	695.676	1428.16	5.42719	0.00635708
BG	1983-10-11	n.m.	845000	153000	1779	n.a.	326	26.19	226	n.a.	0.339	0.153307	-2.08174	10.5244	225.991	26.6032	249.431	53.4324	249.431	40.1274	0.717077	40.1274	11.6947	688.699	1398.25	5.42571	0.00667527
BG	1983-10-13	156	828000	169000	1930	n.a.	378	27.19	241	n.a.	0.38	0.169509	-2.11209	10.3506	222.529	25.4409	261.669	118.827	261.669	49.982	1.82142	49.982	11.5545	701.105	1477.35	5.42832	0.00719835
BG	1983-10-14	157	820800	176300	2041	n.a.	n.a.	n.a.	n.a.	n.a.	n.a.	0.176813	#VALUE!	#VALUE!					nn
BG	1983-10-26	n.m.	843800	153700	1751	n.a.	317	25	216	n.a.	n.a.	0.154085	#VALUE!	10.5784			245.879	39.0157	245.879	37.8293	0.536892	37.8293	11.7626	681.995	1371.85	5.42425	0.00659232
BG	1983-11-03	n.m.	836300	161100	1992	n.a.	337	26.1	232.5	n.a.	n.a.	0.16152	#VALUE!	10.4333			255.678	87.2333	255.678	44.934	1.17277	44.934	11.6715	690.21	1418.22	5.42603	0.00746892
BG	1983-11-14	n.m.	845000	153000	1880	n.a.	310	25	219	n.a.	0.391	0.153307	-2.0061	10.5589	234.631	31.0922	247.152	43.7144	247.152	38.6184	0.596057	38.6184	11.7816	680.236	1363.3	5.42386	0.00708433
BG	1983-11-30	156	846000	151900	1880	n.a.	323	25.1	216	n.a.	0.31	0.15222	-2.09728	10.5898	224.238	25.725	245.149	34.1734	245.149	37.2806	0.503929	37.2806	11.801	678.463	1354.22	5.42346	0.00709077
BG	1983-12-06	n.m.	851000	146600	1788	n.a.	355	27.41	229.5	n.a.	n.a.	0.146953	#VALUE!	10.5484			247.852	41.1748	247.852	38.7861	0.626508	38.7861	11.6842	690.324	1394.47	5.42606	0.00670365
BG	1983-12-20	n.m.	853000	144800	1705	n.a.	327	23.2	215	n.a.	n.a.	0.145119	#VALUE!	10.5988			244.589	25.5717	244.589	36.6195	0.476644	36.6195	11.8415	675.261	1329.8	5.42275	0.00644138
BG	1984-01-11	n.m.	847000	150500	1714	n.a.	329	22.9	222	n.a.	n.a.	0.150877	#VALUE!	10.5084			250.507	55.9007	250.507	40.7386	0.778908	40.7386	11.7823	680.397	1360.07	5.42389	0.00645827
BG	1984-01-17	157	851000	147000	1789	n.a.	313	21.8	212	n.a.	0.221	0.147295	-2.21933	10.5855	210.713	19.7792	245.435	31.0379	245.435	37.246	0.513197	37.246	11.901	669.335	1308.67	5.42139	0.00677985
BG	1984-01-26	n.m.	846000	151700	1817	n.a.	323	22.8	214	n.a.	n.a.	0.15205	#VALUE!	10.5648			246.771	40.9399	246.771	38.3132	0.576755	38.3132	11.8494	673.811	1334.64	5.42242	0.00686971
BG	1984-02-02	n.m.	851000	146600	1667	n.a.	334	22.5	207	n.a.	n.a.	0.146953	#VALUE!	10.6419			241.858	15.4034	241.858	35.0184	0.377562	35.0184	11.8843	670.967	1314.91	5.42177	0.00631203
BG	1984-02-03	n.m.	850000	147700	1672	n.a.	305	21.6	210	n.a.	n.a.	0.14804	#VALUE!	10.5939			244.897	29.3615	244.897	36.9384	0.490884	36.9384	11.8839	670.901	1316.31	5.42175	0.00633118
BG	1984-02-18	n.m.	851000	146600	1818	n.a.	340	21.3	206	n.a.	n.a.	0.146953	#VALUE!	10.6265			242.825	19.5362	242.825	35.6061	0.410695	35.6061	11.9563	664.096	1286.39	5.42016	0.00690924
BG	1984-02-21	157	851000	147000	1760	n.a.	328	16.7	198	n.a.	0.221	0.147295	-2.18966	10.5885	213.958	21.0648	245.246	30.2229	245.246	37.1262	0.5051	37.1262	12.1061	649.835	1227.28	5.41668	0.00674276
BG	1984-03-08	n.m.	851000	146600	1667	n.a.	322	21.5	221	n.a.	n.a.	0.146953	#VALUE!	10.5085			250.504	52.6358	250.504	40.5495	0.775167	40.5495	11.8268	676.491	1337.73	5.42302	0.0062938
BG	1984-03-15	n.m.	848000	149700	1809	n.a.	310	20.4	196	n.a.	n.a.	0.150045	#VALUE!	10.679			239.543	8.36555	239.543	33.7644	0.308596	33.7644	12.022	657.515	1263.54	5.41858	0.00690011
BG	1984-03-20	n.m.	850000	147700	1770	n.a.	293	17	181	n.a.	n.a.	0.14804	#VALUE!	10.748			235.367	-10.9344	235.367	31.3053	0.209499	31.3053	12.2114	639.799	1186.02	5.41407	0.00682187
BG	1984-03-23	n.m.	857000	140900	1602	n.a.	350	19	190	n.a.	n.a.	0.141197	#VALUE!	10.7468			235.486	-16.3736	235.486	31.1215	0.210186	31.1215	12.088	652.225	1228.52	5.41728	0.00612895
BG	1984-04-01	n.m.	840000	157800	1664	n.a.	310	18.7	194	n.a.	n.a.	0.158148	#VALUE!	10.6196			243.217	31.7229	243.217	36.3238	0.430513	36.3238	12.0023	658.531	1280	5.41883	0.00634342
BG	1984-04-03	158	841000	156900	1700	n.a.	318	18.79	192	n.a.	0.27	0.15723	-2.12276	10.6443	221.363	24.5306	241.665	24.2711	241.665	35.328	0.375778	35.328	12.0268	656.292	1269.14	5.41828	0.00648881
BG	1984-04-05	n.m.	844000	153700	1774	n.a.	333	16.9	187	n.a.	n.a.	0.154054	#VALUE!	10.6592			240.747	17.2536	240.747	34.6409	0.345246	34.6409	12.1441	645.486	1218.64	5.41556	0.00681383
BG	1984-04-09	n.m.	848000	149900	1657	n.a.	333	16.4	181	n.a.	n.a.	0.150215	#VALUE!	10.7219			236.922	-2.45455	236.922	32.2581	0.242956	32.2581	12.189	641.662	1196.95	5.41456	0.00637909
BG	1984-04-17	n.m.	838000	159600	1863	n.a.	356	16.4	186	n.a.	n.a.	0.159984	#VALUE!	10.6267			242.759	31.6803	242.759	36.1177	0.414704	36.1177	12.1572	643.584	1219.1	5.41507	0.00716382
BG	1984-04-26	n.m.	843000	154600	1805	n.a.	366	15.1	180.5	n.a.	n.a.	0.154972	#VALUE!	10.6672			240.248	16.0596	240.248	34.3799	0.330625	34.3799	12.2431	635.99	1179.48	5.41304	0.00697321
BG	1984-05-05	n.m.	842000	155800	1659	n.a.	347	14.1	175	n.a.	n.a.	0.156144	#VALUE!	10.6857			239.093	12.4025	239.093	33.7432	0.29848	33.7432	12.271	633.211	1169.2	5.41228	0.00642042
BG	1984-05-10	157	839000	159000	1800	n.a.	370	11.9	170	n.a.	0.259	0.159319	-2.09478	10.6474	224.5	26.0682	241.459	25.5484	241.459	35.2899	0.369951	35.2899	12.3982	620.721	1119.68	5.40871	0.00702367
BG	1984-07-11	n.m.	840000	167800	1562	n.a.	437	10.5	163	n.a.	n.a.	0.166501	#VALUE!	10.6448			241.584	33.839	241.584	35.6711	0.377268	35.6711	12.4189	617.868	1116.85	5.40785	0.00610698
BG	1984-09-20	157	816000	181900	1210	n.a.	699	10.71	158	n.a.	0.201	0.182283	-2.2436	10.6221	208.074	19.5834	242.914	58.0816	242.914	37.2015	0.431761	37.2015	12.2582	631.465	1198.85	5.4118	0.00468799
BG	1984-10-24	157	811000	186900	1150	n.a.	794	10.6	146	n.a.	0.261	0.187293	-2.1103	10.7324	222.684	26.0728	236.001	37.2456	236.001	33.187	0.233124	33.187	12.3248	624.507	1175.17	5.40982	0.00447588
BG	1984-10-24	157	804000	194000	1200	n.a.	843	10.6	149	n.a.	0.29	0.194389	-2.09333	10.6658	224.565	27.2354	240.044	62.6346	240.044	35.9349	0.340558	35.9349	12.2846	627.606	1199.49	5.41071	0.00466091
BG	1984-11-27	156	805000	192900	1150	n.a.	819	10.1	150	n.a.	0.201	0.193306	-2.25243	10.6378	207.123	19.4808	241.82	68.0395	241.82	37.0065	0.397937	37.0065	12.2798	628.182	1200.48	5.41087	0.00446502
BG	1985-01-24	156	800000	198000	960	n.a.	860	10.2	153	n.a.	0.28	0.198397	-2.13111	10.5855	220.339	25.3003	245.137	87.4059	245.137	39.4201	0.532417	39.4201	12.1485	640.324	1262.88	5.41421	0.00369881
BG	1985-03-13	n.m.	785000	212800	1163	n.a.	907	9.7	169	n.a.	n.a.	0.213269	#VALUE!	10.3267			263.169	167.647	263.169	54.0389	2.13172	54.0389	12.0464	648.741	1325.21	5.4164	0.00445843
BG	1985-04-18	157	786000	212000	1160	n.a.	877	12.8	186	n.a.	0.471	0.212425	-2.02741	10.2845	231.952	31.8666	266.428	177.108	266.428	56.8346	2.64868	56.8346	11.8193	671.04	1424.54	5.42178	0.00439212
BG	1985-06-02	157	778000	220000	1090	n.a.	977	13.81	201	n.a.	0.491	0.220441	-2.06356	10.1489	227.83	29.8828	277.467	215.573	277.467	68.0557	5.28824	68.0557	11.6242	689.767	1523.44	5.42594	0.0040878
BG	1985-07-19	n.m.	784000	213600	1080	n.a.	1013	13.4	188	n.a.	n.a.	0.214114	#VALUE!	10.2781			266.911	180.14	266.911	57.3899	2.73968	57.3899	11.7486	677.875	1458.24	5.42333	0.00407465
BG	1985-09-07	157	777000	220900	1160	n.a.	1050	13.4	218	n.a.	0.62	0.221365	-1.99984	9.99077	235.059	34.0673	291.992	252.219	291.992	84.3524	11.4938	84.3524	11.5461	697.596	1560.16	5.42759	0.00433375
BG	1985-09-26	157	777000	220500	1115	n.a.	1010	16.3	218	n.a.	n.a.	0.221053	#VALUE!	10.0766			283.869	232.58	283.869	74.9323	7.56625	74.9323	11.4571	706.737	1600.02	5.42948	0.00414757
BG	1985-11-22	157	775000	222500	1127	n.a.	1037	16.3	205	n.a.	0.4	0.223058	-2.16772	10.175	216.251	24.1587	275.207	211.336	275.207	65.9867	4.64744	65.9867	11.535	698.6	1568.03	5.4278	0.00420843
BG	1985-12-18	157	765000	232600	1135	n.a.	1072	18.3	237	n.a.	0.38	0.23316	-2.27791	9.93149	204.397	19.4091	297.757	269.673	297.757	92.9441	15.3516	92.9441	11.2563	726.874	1714.83	5.43348	0.00418322
BG	1986-02-26	162	797400	200600	1037	n.a.	n.a.	n.a.	n.a.	n.a.	n.a.	0.201002	#VALUE!	#VALUE!					nn
BG	1986-03-14	162	785200	212600	1129	n.a.	n.a.	n.a.	n.a.	n.a.	n.a.	0.213069	#VALUE!	#VALUE!					nn
BG	1986-04-24	162	792100	205800	1102	n.a.	n.a.	n.a.	n.a.	n.a.	n.a.	0.206233	#VALUE!	#VALUE!					nn
BG	1986-11-15	162	793700	204200	1122	n.a.	n.a.	n.a.	n.a.	n.a.	n.a.	0.20463	#VALUE!	#VALUE!					nn
BG	1987-04-24	162	797100	200800	1132	n.a.	n.a.	n.a.	n.a.	n.a.	n.a.	0.201223	#VALUE!	#VALUE!					nn
BG	1987-10-23	162	812900	184800	1201	n.a.	840	31	240	n.a.	n.a.	0.185226	#VALUE!	10.344			262.093	135.702	262.093	51.2924	1.91185	51.2924	11.2084	735.604	1650.08	5.43517	0.00440935
BG	1988-01-10	162	807800	189800	1280	n.a.	810	30	260	n.a.	n.a.	0.190257	#VALUE!	10.1681			276.115	188.662	276.115	64.1925	4.70491	64.1925	11.1388	742.711	1689.73	5.43652	0.00468478
BG	1988-01-31	162	812400	184400	1181	n.a.	807	30	261.5	n.a.	n.a.	0.184992	#VALUE!	10.1806			275.1	181.163	275.1	62.8025	4.40231	62.8025	11.1194	745.224	1689.11	5.43699	0.00431773
BG	1988-02-01	162	813500	184200	1204	n.a.	692	26	223	n.a.	n.a.	0.184625	#VALUE!	10.3979			258.12	120.25	258.12	48.0814	1.44265	48.0814	11.3984	715.699	1566.18	5.43129	0.00446006
BG	1988-03-23	162	811800	186100	1129	n.a.	n.a.	n.a.	n.a.	n.a.	n.a.	0.186492	#VALUE!	#VALUE!					nn
BG	1988-11-05	162	812200	185600	1195	n.a.	n.a.	n.a.	n.a.	n.a.	n.a.	0.186009	#VALUE!	#VALUE!					nn
BG	1989-01-06	162	823700	174200	1110	n.a.	710	15.1	263	n.a.	n.a.	0.174567	#VALUE!	9.92118			299.796	249.107	299.796	88.8437	15.6486	88.8437	11.4283	713.462	1537.84	5.43084	0.00411608
BG	1989-06-15	162	813400	184300	1138	n.a.	836	18.66	294	1.18	0.789	0.184725	-1.92649	9.77321	243.705	37.8225	316.602	292.191	316.602	112.928	31.58	112.928	11.1653	740.269	1668.25	5.43606	0.0041695
BG	1989-06-29	162	813400	184300	1138	n.a.	836	18.66	294	1.18	0.564	0.184725	-2.07229	9.77321	226.963	28.125	316.602	292.191	316.602	112.928	31.58	112.928	11.1653	740.269	1668.25	5.43606	0.0041695
BG	1989-07-15	162	810800	186800	1135	n.a.	836	17.33	294	1.16	0.575	0.187249	-2.07114	9.72969	227.084	28.2751	322.036	303.575	322.036	121.591	38.5772	121.591	11.178	738.705	1666.99	5.43576	0.00416136
BG	1990-11-09	n.m.	790000	207800	1130	n.a.	761	19.95	274	1.19	0.756	0.208258	-1.97925	9.8218	237.479	34.9632	310.224	286.015	310.224	106.831	25.4067	106.831	11.1308	742.231	1726.13	5.43643	0.00413665
BG	1991-03-15	n.m.	794400	203200	1149	n.a.	743	22	307	1.15	n.a.	0.203689	#VALUE!	9.6861			327.244	315.919	327.244	132.655	47.0529	132.655	10.966	760.828	1793.72	5.4399	0.0041727
BG	1991-05-25	n.m.	793800	203800	1202	n.a.	775	20.02	308	1.18	0.48	0.20429	-2.2168	9.6369	210.943	21.2911	333.997	326.74	333.997	144.495	58.4722	144.495	11.0137	755.431	1772.68	5.4389	0.00437523
BG	1991-10-21	n.m.	806700	191000	1204	n.a.	731	24	298	0.94	0.57	0.19144	-2.09266	9.82916	224.649	27.1781	309.74	279.569	309.74	103.93	24.3994	103.93	11.0443	752.981	1734.48	5.43845	0.00438711
BG	1992-02-08	162	814200	183300	1329	n.a.	723	25.6	316	1.02	0.64	0.183759	-2.04594	9.78925	229.952	29.6605	314.66	287.858	314.66	109.94	29.3123	109.94	11.0168	756.619	1732.91	5.43912	0.00483505
BG	1992-04-15	n.m.	817300	180200	1338	n.a.	786	26.3	307	0.94	0.682	0.180652	-1.99673	9.86517	235.592	32.6811	305.841	266.862	305.841	97.2823	20.5072	97.2823	11.0596	752.107	1708.1	5.43828	0.00487721
BG	1992-09-12	n.m.	829900	167700	1409	n.a.	610	24	293	n.a.	n.a.	0.168103	#VALUE!	9.96431			295.356	233.907	295.356	82.8252	12.6514	82.8252	11.2405	733.55	1607.81	5.43477	0.00517769
BG	1992-12-06	n.m.	836300	161100	1526	n.a.	700	21.1	297	0.89	0.498	0.16152	-2.06026	9.91561	228.401	28.0735	300.581	246.097	300.581	88.422	15.9565	88.422	11.3402	723.638	1555.25	5.43285	0.0056325
BG	1993-12-29	162	841500	156100	1429	n.a.	623	18.8	279	1.1	0.337	0.156476	-2.18632	9.99855	214.315	21.4411	291.983	218.539	291.983	77.8537	10.6051	77.8537	11.4647	711.305	1496.11	5.43041	0.00530428
BG	1994-02-03	162	845900	151800	1329	n.a.	581	17.3	270	1.11	0.336	0.15215	-2.15898	10.0406	217.339	22.6018	287.87	203.286	287.87	72.9942	8.5803	72.9942	11.5296	705.152	1463.56	5.42916	0.0049473
BG	1994-03-01	162	850400	147200	1380	n.a.	626	18.1	278	1.2	0.396	0.147554	-2.08463	10.0321	225.68	26.2734	288.708	204.192	288.708	73.4884	8.90798	73.4884	11.5121	707.322	1464.42	5.4296	0.00513191
BG	1994-04-10	162	840500	157000	1372	n.a.	653	17	278	1.2	0.373	0.157393	-2.1437	9.95652	219.027	23.4815	296.276	232.095	296.276	82.8415	13.0426	82.8415	11.4832	709.355	1489.8	5.43001	0.00509732
BG	1994-05-11	162	844600	153100	1270	n.a.	645	16.4	269	1	n.a.	0.153453	#VALUE!	10.0175			290.121	211.282	290.121	75.5275	9.63439	75.5275	11.5272	705.272	1466.3	5.42918	0.0047274
BG	1994-06-28	162	839200	158500	1340	n.a.	596	19	285	1.23	0.47	0.158865	-2.05891	9.95481	228.564	28.0676	296.44	233.159	296.44	83.1788	13.1661	83.1788	11.3924	718.48	1529.49	5.43184	0.00495754
BG	1994-07-19	162	841300	156600	1290	n.a.	579	19	279	1.21	0.36	0.15693	-2.15914	10.0013	217.313	22.7188	291.701	217.843	291.701	77.5809	10.4643	77.5809	11.4146	716.374	1517.46	5.43142	0.00477716
BG	1994-08-10	162	837300	160500	1300	n.a.	599	18.8	281	1.24	0.32	0.160854	-2.22615	9.96538	209.967	19.8073	295.321	230.638	295.321	82.0691	12.5215	82.0691	11.3931	718.237	1532.13	5.43179	0.00481009
BG	1994-08-25	n.m.	836900	160800	1250	n.a.	603	19.6	289	1.25	0.289	0.161171	-2.28361	9.93307	203.804	17.5332	298.708	240.666	298.708	86.1063	14.6582	86.1063	11.3206	725.707	1562.96	5.43326	0.00460948
BG	1994-09-16	162	843600	154100	1292	n.a.	621	17.3	268	1.168	0.3	0.154455	-2.21268	10.0423	211.434	20.229	287.703	203.767	287.703	73.0157	8.52999	73.0157	11.5163	706.274	1472.11	5.42939	0.00480702
BG	1994-10-13	n.m.	838900	158700	1296	n.a.	639	17.9	284	1.201	n.a.	0.159082	#VALUE!	9.93384			298.651	239.716	298.651	85.8243	14.5841	85.8243	11.4029	717.382	1525.44	5.43162	0.00479716
BG	1994-12-26	162	837500	160200	1223	n.a.	627	14.7	267	1.237	0.41	0.160569	-2.09541	9.94855	224.427	26.0716	297.077	235.711	297.077	84.099	13.5901	84.099	11.5228	705.081	1477.94	5.42914	0.00455286
BG	1995-01-21	162	832500	165300	1201	n.a.	638	11.5	279	1.35	0.25	0.165664	-2.34555	9.74155	197.316	15.4441	321.198	297.564	321.198	117.168	36.4822	117.168	11.4952	707.416	1496.59	5.42962	0.00446606
BG	1995-02-04	162	827500	170300	1196	n.a.	586	9.11	268	1.302	0.11	0.170675	-2.70019	9.68684	163.872	7.38356	328.356	312.685	328.356	129.181	46.8706	129.181	11.5835	698.1	1466.91	5.4277	0.00446716
BG	1995-03-09	n.m.	832300	165700	1100	n.a.	526	7.79	252	1.65	0.3914	0.166032	-2.10782	9.74773	223.016	25.5655	320.381	295.899	320.381	115.985	35.4495	115.985	11.695	687.475	1414.47	5.42544	0.00412999
BG	1995-04-22	164	825700	172300	1066	n.a.	578	7.57	270	1.525	0.1038	0.172645	-2.73463	9.58464	161.021	6.90963	343.261	338.338	343.261	155.626	73.8518	155.626	11.5486	701.424	1484.28	5.42839	0.00397527
BG	1995-05-26	n.m.	805200	192700	1196	n.a.	538	7.3	236	1.28	0.29	0.193106	-2.28949	9.71041	203.188	18.0026	324.367	309.064	324.367	126.2	42.1351	126.2	11.7221	682.342	1439.69	5.42432	0.00450201
BG	1995-12-27	n.m.	816700	181000	1228	n.a.	646	13.6	296	1.41	0.51	0.181417	-2.10934	9.63894	222.807	25.9449	334.655	325.203	334.655	141.608	58.0023	141.608	11.3014	726.051	1603.04	5.43332	0.00452766
BG	1996-01-19	162	807200	190500	1252	n.a.	689	14.1	307	1.5	0.52	0.190939	-2.14405	9.5487	218.921	24.4066	347.859	345.759	347.859	168.133	85.6259	168.133	11.204	735.628	1661.83	5.43517	0.00459654
BG	1996-02-20	162	810400	187300	1236	n.a.	704	15.7	332	1.5	0.541	0.187732	-2.15178	9.47361	218.073	23.923	360.622	361.944	361.944	197.186	120.878	120.878	11.0687	750.569	1716.71	5.438	0.00450838
BG	1996-03-09	162	826200	171500	1177	n.a.	656	14.8	311	1.42	0.51	0.171895	-2.10237	9.6333	223.613	26.0332	335.934	326.41	335.934	142.207	59.6131	142.207	11.231	734.252	1618.02	5.43491	0.00432381
BG	1996-04-11	162	825800	171900	1201	n.a.	679	15.6	310	1.48	0.53	0.172296	-2.08549	9.6599	225.512	26.975	332.064	319.703	332.064	135.606	52.9183	135.606	11.2276	734.579	1620.14	5.43497	0.00441134
BG	1996-06-28	162	826100	171400	1200	n.a.	650	15.2	311	1.46	0.53	0.17183	-2.08546	9.64492	225.516	26.9619	334.239	323.487	334.239	139.248	56.601	139.248	11.232	734.156	1617.5	5.43489	0.00440849
BG	1996-07-31	162	816400	181600	1089	n.a.	674	15.5	279	n.a.	0.65	0.181964	-1.9799	9.79641	237.524	33.866	313.836	285.59	313.836	108.508	28.3394	108.508	11.2944	726.744	1606.97	5.43346	0.00401391
BG	1996-08-30	162	816700	184000	1190	n.a.	649	14.6	323	n.a.	0.72	0.183871	-2.00463	9.51098	234.671	32.2793	354.471	354.414	354.471	180.125	100.629	180.125	11.1334	743.792	1680.94	5.43672	0.00435334
BG	1996-10-14	162	829400	168500	1168	n.a.	653	15.5	308	n.a.	0.67	0.168855	-1.97031	9.68459	238.694	34.0215	328.745	313.168	328.745	129.533	47.3686	129.533	11.243	733.227	1607.96	5.43471	0.00429269
BG	1996-12-28	162	813200	184500	1222	n.a.	713	17.4	297	1.45	0.27	0.184925	-2.39719	9.72432	192.064	14.1657	322.807	304.573	322.807	122.455	39.5206	122.455	11.205	735.991	1651.06	5.43524	0.00448568
BG	1997-01-31	162	821900	175800	1221	n.a.	724	19.1	305	1.41	0.23	0.176205	-2.45277	9.75809	186.513	12.4467	318.734	294.564	318.734	114.926	33.8121	114.926	11.1753	739.858	1649.33	5.43598	0.00447441
BG	1997-02-28	162	821400	176400	1189	n.a.	685	17.1	291	1.37	0.4	0.176789	-2.19378	9.78914	213.476	21.6172	314.851	286.393	314.851	109.286	29.277	109.286	11.2645	730.313	1611.52	5.43415	0.00437553
BG	1997-03-25	162	822300	175600	1119	n.a.	665	16.9	296	1.33	0.46	0.17597	-2.13803	9.75832	219.62	24.2811	318.712	294.465	318.712	114.86	33.7758	114.86	11.2218	734.902	1628.68	5.43503	0.00410956
BG	1997-04-18	162	830900	166900	1191	n.a.	660	16.7	239	1.32	0.44	0.167268	-2.03785	10.1649	230.934	29.5923	276.529	172.704	276.529	62.8133	4.68753	62.8133	11.5898	697.778	1459.56	5.42763	0.00444918
BG	1997-05-03	162	819000	178600	1267	n.a.	662	17.4	309	1.33	0.43	0.17903	-2.19509	9.68197	213.33	21.6152	328.69	314.513	328.69	131.047	47.8687	131.047	11.1912	737.931	1647.14	5.43561	0.0046469
BG	1997-05-21	162	825200	172500	1271	n.a.	639	17.8	306	1.33	0.42	0.172898	-2.1827	9.73698	214.693	22.0261	321.548	299.681	321.548	118.729	37.2598	118.729	11.2272	734.577	1621.31	5.43497	0.00466846
BG	1997-06-18	162	828800	169000	1180	n.a.	649	15.4	303	1.23	0.43	0.169373	-2.15741	9.70766	217.484	23.1342	325.562	307.105	325.562	124.482	42.6331	124.482	11.2704	730.287	1597.03	5.43415	0.00434246
BG	1997-07-17	162	826300	171400	1170	n.a.	663	15.3	293	1.19	0.45	0.171795	-2.13053	9.75176	220.464	24.545	319.675	295.571	319.675	115.724	34.8006	115.724	11.3056	726.392	1585.81	5.43339	0.00431315
BG	1997-09-02	162	827600	170100	1198	n.a.	670	15.4	298	1.22	0.41	0.170492	-2.17432	9.73123	215.617	22.3552	322.381	300.922	322.381	119.665	38.2582	119.665	11.2957	727.544	1588.01	5.43362	0.00441409
BG	1997-12-16	162	823800	173800	1256	n.a.	620	24.4	365	1.41	n.a.	0.174218	#VALUE!	9.56146			346.826	343.764	346.826	162.72	81.6032	162.72	10.8612	774.956	1785.76	5.44249	0.00453423
BG	1998-01-26	162	834900	162800	1290	n.a.	582	22.6	348.4	1.248	0.594	0.163175	-2.05831	9.66068	228.617	28.2396	332.395	319.299	332.395	134.683	52.8898	134.683	11.0163	758.267	1696.79	5.43943	0.00468987
BG	1998-03-10	162	828400	169100	1390	n.a.	603	24.1	353.6	1.236	0.532	0.169524	-2.1325	9.63278	220.248	24.3791	336.133	326.537	336.133	142.149	59.8013	142.149	10.9748	762.397	1726.15	5.44019	0.00504456
BG	1998-05-28	162	832300	165700	1060	n.a.	570	28	393	1.6	0.602043	0.166032	-2.11381	9.53138	222.345	25.2482	352.371	351.581	352.371	172.011	93.416	172.011	10.6737	797.674	1856.24	5.44655	0.00379098
BG	1998-06-23	164	837500	160000	1307	n.a.	664	31	441.9	1.12	0.788234	0.160401	-2.0298	9.39788	231.88	29.8535	377.841	382.519	382.519	239.138	179.016	179.016	10.5929	807.939	1882.82	5.44836	0.00465498
BG	1998-07-29	160	834400	163300	1360	0.872	557	28.4	396	1.53	0.6044	0.163676	-2.10798	9.53505	223.004	25.4878	351.951	350.982	351.951	170.686	92.1621	170.686	10.7769	785.572	1804.45	5.4444	0.00488808
BG	1998-08-20	162	829600	168000	1370	0.544	574	30.3	426	1.63	0.6237	0.168404	-2.14087	9.41397	219.319	23.9242	373.525	377.422	377.422	228.6	163.99	163.99	10.6341	802.296	1879.31	5.44737	0.00489048
BG	1998-09-29	162	837200	160400	1361	0.43	432	23	326	1.25	0.56	0.160786	-2.0474	9.79497	229.867	28.8044	314.564	281.774	314.564	106.796	28.4061	106.796	11.1351	745.427	1641.2	5.43703	0.00497537
BG	1998-10-15	161.3	840500	157300	1292.67	0.466344	435.408	23.6994	321.75	1.14878	0.543307	0.157647	-2.04466	9.84608	230.191	28.8655	308.488	266.077	308.488	98.0899	22.2609	98.0899	11.1341	745.792	1636.53	5.4371	0.00472483
BG	1998-11-16	160.6	845100	152500	1338	1.05	561	30	399	1.4	0.534	0.152867	-2.12979	9.59759	220.586	24.0517	342.603	336.436	342.603	150.792	70.8072	150.792	10.7899	784.887	1778.81	5.44428	0.00481037
BG	1998-12-16	162	842300	155400	1347.34	0.563538	514.47	29.9477	392.315	1.30816	0.552	0.155758	-2.11768	9.61224	221.936	24.7513	340.085	332.337	340.085	146.763	66.1189	146.763	10.8022	783.221	1778.52	5.44398	0.00484727
BG	1999-03-23	161	843500	154000	1394	0.489	507	31.8	423	1.29	0.518	0.154386	-2.17345	9.51389	215.735	21.979	356.508	357.399	356.508	177.992	102.108	177.992	10.6988	795.563	1822.68	5.44618	0.00498978
BG	1999-04-29	162	848400	149000	1454	0.567	541	35.1	436	1.23	0.577	0.149388	-2.1229	9.52858	221.365	24.3056	354.475	354.625	354.475	172.832	96.561	172.832	10.6606	800.542	1830.71	5.44706	0.00519402
BG	1999-06-03	162	848300	149200	1448	0.444	506	33.1	405	1.18	0.551	0.149574	-2.11152	9.63044	222.641	24.8966	337.723	327.921	337.723	141.555	61.2478	141.555	10.7798	786.339	1777.44	5.44454	0.00520273
BG	1999-08-03	150	835500	161900	1487	0.58	535.8	30.8	423.5	1.26	0.565545	0.162322	-2.16169	9.45968	217.023	22.7392	365.479	368.662	368.662	206.174	136.051	136.051	10.6996	794.846	1837.2	5.44605	0.00532423
BG	1999-09-16	150.7	852900	144600	1469	0.42	499	28.1	417.8	1.22	0.5655	0.144962	-2.09781	9.52826	224.198	25.4878	355.06	355.511	355.06	173.107	97.4627	173.107	10.8325	780.559	1745.97	5.4435	0.00529082
BG	1999-10-19	151.5	828300	168700	1776	0.61	567.6	31.8	502.8	1.48	0.569552	0.169208	-2.25479	9.14248	206.878	18.8242	438.904	426.569	426.569	374.935	351.409	351.409	10.4975	819.135	1945.46	5.45029	0.00629721
BG	1999-11-25	155.8	854500	143000	1536	0.436	460	23.4	374	1.06	0.428773	0.143358	-2.16427	9.64924	216.765	22.127	335.31	323.221	335.31	136.415	56.5453	136.415	11.0782	753.037	1637.34	5.43846	0.00559671
BG	2000-01-03	157.2	867400	130300	1289	0.364	412	19.1	395	1.13	0.37715	0.1306	-2.19681	9.53258	213.186	20.3545	356.325	357.599	356.325	172.757	98.8729	172.757	11.0545	756.707	1627.29	5.43914	0.00468935
BG	2000-02-29	154.2	837000	160500	1532.69	0.432296	471.386	19.5711	372.711	1.25581	0.614592	0.160902	-2.06554	9.49155	227.804	27.7495	359.789	361.632	361.632	190.206	116.175	116.175	11.0541	754.265	1676.42	5.43869	0.00558171
BG	2000-03-24	151	853900	144000	1147.27	0.479079	443.799	18.2528	341.798	1.14975	0.402763	0.144303	-2.15568	9.69351	217.717	22.5562	328.716	310.412	328.716	125.77	45.9654	125.77	11.1554	744.594	1606.34	5.43688	0.00419555
BG	2000-04-11	157	855000	143100	1019.2	0.365427	435.425	17.6169	318.543	1.09792	0.447082	0.143372	-2.07645	9.80548	226.62	26.5999	313.765	276.475	313.765	103.521	26.9881	103.521	11.2205	737.725	1577.77	5.43557	0.00373839
BG	2000-05-17	156.3	827100	170300	1557.17	0.438962	480.177	19.8641	358.329	1.24145	0.684174	0.170744	-2.03277	9.51996	231.501	30.0209	353.921	353.717	353.921	176.144	97.6888	176.144	11.0662	752.153	1687.88	5.43829	0.00567601
BG	2000-06-15	153	841500	156300	1267.77	0.500897	464.924	18.5923	347.35	1.17499	0.543828	0.156645	-2.07421	9.61252	226.834	27.1244	339.978	332.202	339.978	146.727	65.9851	146.727	11.1091	748.586	1645.62	5.43763	0.0046282
BG	2000-07-06	161.3	847700	149900	1289.37	n.a.	n.a.	n.a.	n.a.	n.a.	n.a.	0.150261	#VALUE!	#VALUE!					nn
BG	2000-08-01	160.3	845400	152300	1365.96	0.608638	452.523	19.3711	351.483	1.35404	0.426887	0.152651	-2.17123	9.62908	215.982	22.0379	337.711	328.062	337.711	142.047	61.4474	142.047	11.1312	746.517	1629.73	5.43724	0.00499115
BG	2000-08-22	160.5	847300	150600	1244.21	0.391903	460.401	19.0015	254.116	1.2793	0.39615	0.150917	-2.05696	10.193	228.813	27.931	274.145	153.263	274.145	59.4105	3.99096	59.4105	11.5544	702.783	1451.82	5.42867	0.00463684
BG	2000-08-23	160	840600	157200	1298.09	0.630643	494.939	20.0951	269.009	1.34009	0.498079	0.157547	-2.00433	10.0859	234.817	31.3517	283.58	191.349	283.58	68.9883	6.88747	68.9883	11.4418	713.537	1507.07	5.43085	0.00481339
BG	2000-08-26	161.1	844000	153700	1381.44	0.327998	416.888	17.8345	317.312	1.19536	0.495495	0.154054	-2.06678	9.76401	227.685	27.4653	318.687	289.965	318.687	111.848	32.8702	111.848	11.3007	728.389	1560.53	5.43378	0.00508805
BG	2000-10-25	160.3	846500	151300	1309.99	0.389415	414.702	19.08	323.797	1.22186	0.571665	0.151634	-2.00534	9.77016	234.726	31.0831	317.978	287.934	317.978	110.5	31.9364	110.5	11.2391	735.065	1582.6	5.43507	0.00481063
BG	2000-11-20	160.3	842900	155000	1256.46	0.406029	454.788	19.721	329.667	1.28068	0.450263	0.155326	-2.12916	9.7354	220.651	24.1512	322.394	298.377	322.394	117.537	37.5893	117.537	11.1668	742.456	1618.85	5.43647	0.00459915
BG	2000-11-20	161.7	845500	152300	1284.59	0.374782	443.445	19.1299	321.761	1.22738	0.442674	0.152636	-2.11704	9.77733	222.015	24.6967	317.025	285.891	317.025	109.257	30.8669	109.257	11.2336	735.556	1586.42	5.43516	0.00471633
BG	2000-12-21	161.3	842600	155300	1253.74	0.429446	445.437	18.6895	335.382	1.29288	0.430395	0.155627	-2.15722	9.68075	217.528	22.7765	329.911	313.82	329.911	129.391	48.4281	129.391	11.1577	743.413	1623.21	5.43665	0.00458728
BG	2001-01-15	158.3	843600	154200	1265.21	0.526617	445.889	17.4082	342.937	1.31268	0.429767	0.15454	-2.16393	9.61636	216.787	22.4288	339.534	331.336	339.534	145.571	64.9758	145.571	11.1565	743.626	1621.97	5.43669	0.00462882
BG	2001-01-25	160.5	844300	153500	1224.78	0.532286	439.308	17.1275	358.356	1.30273	0.427132	0.153838	-2.18336	9.53631	214.644	21.5096	352.651	351.981	352.651	170.088	92.7257	170.088	11.0867	751.258	1650.65	5.43813	0.00446614
BG	2001-03-01	161	826100	171500	1385	0.5749	492.2	17.5	371.592	1.3968	0.4739	0.171913	-2.21161	9.39664	211.537	20.6971	376.535	380.313	380.313	236.82	174.131	174.131	10.9951	759.939	1721.35	5.43974	0.00503166
BG	2001-03-07	160.9	840900	157000	1218	0.4234	409.3	14.61	304.254	1.1678	0.4239	0.15733	-2.12713	9.73478	220.874	24.3102	322.397	298.688	322.397	117.821	37.6823	117.821	11.3505	722.934	1544.68	5.43272	0.00449709
BG	2001-05-02	159.9	840800	157000	1262.23	0.554935	435.588	15.9929	334.135	1.23802	0.615866	0.157346	-2.00564	9.61111	234.667	31.2609	340.147	332.524	340.147	147.152	66.364	147.152	11.2039	738.321	1606.31	5.43569	0.00462861
BG	2001-05-11	159.1	837600	160300	1248.82	0.408742	432.962	16.5217	355.831	1.33543	0.492744	0.160637	-2.14052	9.50029	219.374	23.7273	358.254	359.635	358.254	182.956	107.29	182.956	11.0827	751.143	1663.56	5.43811	0.00455401
BG	2001-05-11	159.9	841400	156400	1270.43	0.400301	428.931	16.7749	342.787	1.33295	0.481038	0.156745	-2.12208	9.59033	221.441	24.5522	343.453	337.963	343.453	153.046	72.8508	153.046	11.159	743.183	1624.46	5.43661	0.0046488
BG	2001-05-22	158.6	835000	162800	1299.22	0.388924	446.932	17.6693	357.122	1.38051	0.497976	0.163159	-2.14558	9.51105	218.807	23.5454	356.113	356.739	356.113	179.039	102.19	179.039	11.0637	753.025	1676.03	5.43846	0.00473399
BG	2001-07-19	157.2	842300	155500	1230.11	0.522135	444.739	19.5342	341.766	1.29965	0.65566	0.155843	-1.98331	9.66602	237.251	32.6612	332.016	317.881	332.016	132.884	51.8092	132.884	11.1074	748.839	1645.05	5.43767	0.00449025
BG	2001-08-11	158	834900	162900	1287.46	0.499055	456.128	20.6133	350.788	1.33466	0.476144	0.163259	-2.15759	9.60859	217.474	22.9609	340.142	332.839	340.142	148.181	66.8221	148.181	11.0373	755.928	1687.72	5.439	0.00468529
BG	2001-09-28	158.8	836800	161100	1253.01	0.320663	447.932	22.5919	353.671	1.34864	0.455001	0.161439	-2.17506	9.64295	215.548	22.0845	335.075	323.993	335.075	138.954	57.3533	138.954	10.9915	761.16	1704.65	5.43996	0.00454977
BG	2001-10-25	158.3	837300	160600	1222.14	0.496133	430.025	22.1239	327.186	1.25864	0.452973	0.160938	-2.14159	9.77146	219.255	23.6824	317.504	288.574	317.504	111.034	31.7309	111.034	11.0977	749.478	1657.57	5.43779	0.00445991
BG	2001-11-29	159.8	838400	159400	1243.18	0.390254	417.622	22.7464	333.623	1.20306	0.406082	0.159751	-2.19368	9.75521	213.505	21.1909	319.627	293.079	319.627	113.995	34.243	113.995	11.0737	752.194	1665.96	5.4383	0.0045314
BG	2001-12-13	159.8	837000	160800	1284.78	0.424673	430.825	22.2749	332.2	1.23592	0.422849	0.161155	-2.17877	9.74684	215.14	21.9049	320.666	295.601	320.666	115.738	35.6047	115.738	11.0949	749.764	1659.13	5.43785	0.00468792
BG	2002-01-08	160.2	842800	155000	1271.42	1.89184	479.692	23.5655	341.929	1.23797	0.434161	0.155342	-2.16089	9.7491	217.122	22.5937	320.582	294.425	320.582	114.816	35.2534	114.816	11.058	754.279	1665.44	5.43869	0.0046302
BG	2002-02-04	161	828400	169200	1403.54	0.459133	447.509	22.3609	374.453	1.31686	0.498005	0.169607	-2.18632	9.50046	214.3	21.7736	357.373	358.311	357.373	183.069	106.18	183.069	10.926	767.906	1748.1	5.4412	0.00508187
BG	2002-02-27	159.6	838000	159800	1288.78	0.381795	413.049	20.3062	354.544	1.2002	0.47542	0.160152	-2.15293	9.59835	217.997	23.1039	341.938	335.636	341.938	150.884	70.0917	150.884	11.0424	755.609	1680.22	5.43894	0.00469076
BG	2002-03-14	159.3	836700	161000	1389.45	0.420982	423.706	19.9525	371.64	1.25319	0.551421	0.161371	-2.1129	9.50296	222.459	25.1611	357.706	358.896	357.706	181.968	105.984	181.968	11.0077	759.358	1697.43	5.43963	0.00504907
BG	2002-04-18	158.8	826400	171100	1498.26	0.585865	436.236	19.3857	422.911	1.37806	0.657917	0.171529	-2.12414	9.218	221.177	24.8674	417.371	413.69	413.69	332.612	298.574	298.574	10.8135	780.692	1802.48	5.44352	0.00539589
BG	2002-04-23	160	828700	168800	1485.08	0.461424	437.908	19.181	424.094	1.38826	0.584854	0.169223	-2.16939	9.21924	216.162	22.5547	417.566	414.125	414.125	333.089	299.516	299.516	10.8191	780.214	1795.61	5.44344	0.00534951
BG	2002-05-09	160.1	850100	147900	1062.78	0.511148	383.2	16.2319	367.187	1.16442	0.537636	0.148196	-2.0749	9.49873	226.782	26.83	359.988	362.217	362.217	188.616	115.99	115.99	11.0318	757.74	1664.91	5.43933	0.00386466
BG	2002-06-20	161.7	830700	166800	1448.82	0.821447	453.822	18.7562	400.869	1.36213	0.670067	0.167218	-2.07964	9.31671	226.187	27.1454	394.236	397.153	397.153	280.758	232.443	232.443	10.9064	770.311	1752.54	5.44164	0.00524051
BG	2002-07-15	160.6	831600	166000	1463.77	0.469457	456.384	18.4388	400.149	1.47406	0.574281	0.166399	-2.14329	9.31639	219.055	23.7477	394.453	397.422	397.422	281.251	233.218	233.218	10.9221	768.587	1744.05	5.44133	0.00529842
BG	2002-09-24	161.5	832300	165500	1391.28	0.397674	420.115	17.3381	351.474	1.48643	0.517401	0.165865	-2.13058	9.51775	220.47	24.3735	354.707	354.808	354.707	176.719	99.0352	176.719	11.1092	747.831	1660.79	5.43748	0.00508077
BG	2002-10-24	160	833000	164700	1366.75	0.33803	452.759	19.6205	386.422	1.66347	0.515132	0.16508	-2.17119	9.41035	215.969	22.3603	374.662	378.861	378.861	231.249	167.969	167.969	10.932	767.571	1737.31	5.44114	0.00494936
BG	2002-11-19	159.6	827600	170100	1315.59	0.510112	472.331	19.9154	375.571	1.63212	0.494574	0.170492	-2.19335	9.441	213.53	21.4757	368.08	371.299	371.299	214.366	145.267	145.267	10.9266	767.761	1749.4	5.44118	0.0047637
BG	2003-01-16	161.9	828800	168900	1322.79	0.57886	478.546	22.1819	401.563	1.74984	0.432503	0.169289	-2.27694	9.37715	204.514	17.9589	380.834	384.818	384.818	247.663	188.742	188.742	10.8057	781.774	1801.84	5.44372	0.0047618
BG	2003-02-25	160.8	834200	163500	1335.49	0.533488	512.726	23.2762	395.849	1.6766	0.446629	0.163877	-2.23983	9.44836	208.487	19.3091	367.429	370.891	370.891	211.717	142.895	142.895	10.84	778.203	1776.31	5.44307	0.00481468
BG	2003-03-19	160.4	825000	172600	1355.75	0.457371	489.708	23.4775	409.987	1.81375	0.5224	0.173015	-2.21535	9.34835	211.13	20.5608	386.372	389.69	389.69	261.818	206.691	206.691	10.7514	787.87	1833.8	5.44481	0.0048682
BG	2003-03-19	160.4	825000	172600	1355.75	0.457371	489.708	23.4775	409.987	1.81375	0.5224	0.173015	-2.21535	9.34835	211.13	20.5608	386.372	389.69	389.69	261.818	206.691	206.691	10.7514	787.87	1833.8	5.44481	0.0048682
BG	2003-04-14	161.8	818400	179000	1440.94	0.696747	562.527	24.9875	451.806	1.8846	0.619073	0.179467	-2.2031	9.17692	212.456	21.264	426.57	418.243	418.243	350.883	320.393	320.393	10.5905	806.806	1922.17	5.44816	0.00513437
BG	2003-06-11	160.3	821100	176500	1397.05	0.457892	465.522	19.111	384.5	1.88078	0.559713	0.176925	-2.16928	9.35254	216.162	22.7658	384.959	388.019	388.019	258.514	201.708	201.708	10.9013	770.151	1772.57	5.44161	0.00505359
BG	2003-06-24	161.4	823800	173800	1394.19	0.431623	482.114	19.8009	397.999	1.62378	0.563629	0.174218	-2.17312	9.32039	215.744	22.5105	392.281	394.744	394.744	276.256	225.415	225.415	10.8526	775.951	1789.68	5.44267	0.00503102
BG	2003-07-03	161	827600	170100	1342.94	0.499322	479.044	18.9091	398.488	1.66038	0.53606	0.170492	-2.18409	9.31559	214.544	21.8995	393.939	396.549	396.549	280.136	231.1	231.1	10.8649	774.813	1777.18	5.44246	0.00484838
BG	2003-08-06	161.8	827000	170600	1389.87	0.61049	500.799	19.3404	435.885	1.77478	0.66913	0.17101	-2.12833	9.16702	220.71	24.6353	431.315	422.191	422.191	360.599	333.629	333.629	10.7396	789.425	1835.41	5.44509	0.00498752
BG	2003-09-26	162.2	821300	176200	1437.88	0.459755	467.14	16.814	410.154	1.7335	0.601086	0.176642	-2.16551	9.18588	216.577	22.939	424.757	417.578	417.578	347.459	316.518	316.518	10.854	775.602	1793.57	5.4426	0.00518944
BG	2003-10-10	162.4	798200	199000	1628.97	0.50042	554.594	19.3911	484.945	2.11398	0.635232	0.199559	-2.2795	8.85443	204.243	18.5368	533.297	456.624	456.624	509.37	501.489	501.489	10.5209	814.004	1998.96	5.44941	0.00578765
BG	2003-11-11	163.6	821000	176500	1440.78	0.535419	488.141	16.6375	421.951	1.80092	0.535014	0.176942	-2.2293	9.13067	209.617	20.0565	440.252	426.147	426.147	376.968	352.901	352.901	10.8137	780.267	1812.66	5.44345	0.0051898
BG	2003-11-28	163.5	821900	175700	1400.33	0.549166	464.798	16.0098	407.171	1.77551	0.650751	0.176123	-2.12631	9.17978	220.924	24.8877	426.528	418.704	418.704	351.004	321.022	321.022	10.8678	774.059	1786.34	5.44232	0.00505718
BG	2004-01-16	163	815800	181700	1407.3	0.64847	515.025	18.0874	430.135	1.90877	0.531849	0.182155	-2.25559	9.10994	206.79	19.0887	445.087	427.797	427.797	385.255	362.285	362.285	10.7308	789.642	1861.28	5.44513	0.00504963
BG	2004-02-06	162.3	817300	180300	1360.17	0.520056	483.023	17.6343	407.675	1.87188	0.461063	0.180734	-2.29017	9.19863	203.116	17.7048	420.517	414.402	414.402	338.676	304.871	304.871	10.8085	780.582	1822.29	5.4435	0.0048988
BG	2004-03-23	163	812900	184600	1449.52	0.611055	502.624	17.3833	394.059	1.83445	0.497965	0.185063	-2.25456	9.2318	206.899	19.1984	411.303	407.806	407.806	319.228	279.424	279.424	10.8705	773.078	1802.01	5.44215	0.00523697
BG	2004-04-28	158.6	811900	185700	1332.54	0.465286	518.735	19.3732	410.325	1.81837	0.557883	0.186147	-2.22589	9.20389	209.978	20.4275	418.146	412.139	412.139	333.52	297.512	297.512	10.7407	788.165	1864.56	5.44486	0.00478429
BG	2004-05-31	161.8	813600	184000	1304.17	0.710473	569.183	20.9809	441.749	2.02344	0.559622	0.184443	-2.25169	9.11795	207.206	19.301	442.147	425.979	425.979	379.835	355.416	355.416	10.6092	804.152	1923.53	5.4477	0.00465198
BG	2004-06-18	161.6	826100	171500	1323.42	0.767553	549.586	20.2184	423.558	1.85031	0.532521	0.171913	-2.21781	9.23196	210.864	20.4273	413.696	411.211	411.211	324.834	288.64	288.64	10.7442	788.807	1835.01	5.44498	0.00475028
BG	2004-07-30	162.6	814200	183400	1327.55	0.580619	520.271	18.3666	408.72	1.85983	0.683046	0.183841	-2.12964	9.19785	220.535	24.9407	420.126	413.713	413.713	337.703	303.171	303.171	10.7696	784.919	1846.45	5.44428	0.00477274
BG	2004-07-30	162.6	817300	180500	1110.57	0.574452	530.366	18.4916	418.745	1.91278	0.671757	0.180898	-2.13883	9.17223	219.521	24.3814	427.543	418.601	418.601	352.702	322.458	322.458	10.6681	797.243	1888.25	5.44648	0.00397254
BG	2004-09-17	163.3	826600	171000	1358.43	0.562784	490.22	19.4145	404.697	1.80165	0.55849	0.171411	-2.17581	9.29579	215.451	22.3089	398.303	400.005	400.005	290.456	244.412	244.412	10.8356	778.13	1792.18	5.44306	0.00489753
BG	2004-10-21	163.2	817900	179700	1337.12	0.420417	504.975	20.3887	412.365	1.81321	0.54168	0.180132	-2.22339	9.24452	210.254	20.3874	409.007	406.893	406.893	314.459	274.082	274.082	10.7477	787.785	1849.38	5.4448	0.00480146
BG	2004-11-25	162.9	811400	186200	1324.37	0.466662	519.094	21.3462	425.232	1.86496	0.515615	0.186648	-2.27704	9.18178	204.504	18.3386	423.827	415.563	415.563	344.986	311.94	311.94	10.6564	798.232	1905.49	5.44665	0.00473539
BG	2004-12-23	161.9	815200	182300	1356.79	0.553887	527.424	21.7666	430.963	2.0695	0.538114	0.182757	-2.25309	9.1843	207.057	19.2043	423.906	416.18	416.18	345.391	313.031	313.031	10.6592	798.18	1896.22	5.44664	0.00485143
BG	2005-01-11	163.3	816000	181600	1336.63	0.437458	484.872	20.3054	399.683	1.84536	0.547649	0.182037	-2.21064	9.28839	211.633	20.9926	398.331	398.757	398.757	290.54	242.781	242.781	10.7853	783.207	1835.6	5.44398	0.00480878
BG	2005-01-11	163.3	816900	180700	1344.67	0.613766	513.361	21.296	422.925	1.95857	0.544968	0.181135	-2.23468	9.21496	209.034	19.9295	416.216	411.613	411.613	329.784	293.535	293.535	10.6964	793.825	1875.4	5.44587	0.00481663
BG	2005-02-09	160	819000	178700	1306	0.566865	510.866	21.5387	424.426	1.9172	0.567153	0.179112	-2.21294	9.22302	211.386	20.8173	414.543	410.798	410.798	326.365	289.492	289.492	10.6846	795.393	1876.91	5.44615	0.00467511
BG	2005-03-22	159.8	812600	184900	1378.09	0.698386	523.737	22.5002	454.855	1.99904	0.590778	0.185363	-2.24351	9.09326	208.082	19.6607	449.34	429.36	429.36	392.428	370.53	370.53	10.5666	809.327	1945.93	5.4486	0.00490545
BG	2005-04-28	156	819500	178000	1366.3	0.55441	526.295	21.8633	463.978	1.97671	0.567259	0.178446	-2.24959	9.0775	207.433	19.2466	456.156	433.56	433.56	404.478	385.708	385.708	10.5732	809.012	1928.32	5.44854	0.00486411
BG	2005-05-09	157	812500	185000	1440.33	0.363992	506.098	21.5232	452.992	1.91334	0.57041	0.185464	-2.25725	9.08067	206.611	19.0983	453.21	431.15	431.15	399.026	378.418	378.418	10.6038	804.733	1928.22	5.4478	0.00513646
BG	2005-05-09	159	819000	178500	1378.43	0.443971	512.857	20.3516	459.516	2.02065	0.550553	0.178947	-2.25986	9.06089	206.335	18.8429	461.39	435.773	435.773	412.984	395.659	395.659	10.6082	804.671	1912.67	5.44779	0.00491584
BG	2005-06-13	161.2	797300	200200	1311.92	0.51028	534.962	21.6226	500.435	2.0885	0.738967	0.200702	-2.23056	8.84254	209.463	20.5902	538.186	457.732	457.732	514.965	507.352	507.352	10.3485	835.945	2088.07	5.45314	0.00462138
BG	2005-07-13	159.4	817100	180400	1404.74	0.461574	488.222	19.7314	455.094	1.88811	0.549962	0.180852	-2.26173	9.05562	206.134	18.8115	462.542	435.975	435.975	414.703	397.466	397.466	10.6301	801.856	1906.16	5.44729	0.00501539
BG	2005-08-02	160.1	810500	186900	1470.43	1.01204	534.069	19.8636	475.744	1.95096	0.626941	0.187387	-2.243	8.95197	208.136	19.7304	497.417	447.913	447.913	465.15	454.313	454.313	10.5529	810.873	1956.81	5.44887	0.0052309
BG	2005-09-22	160	820700	176800	1420.09	0.589806	494.003	18.3304	430.805	1.82601	0.60403	0.177243	-2.18652	9.1353	214.269	21.9625	438.816	425.356	425.356	374.323	349.64	349.64	10.7513	787.57	1842.05	5.44476	0.00509984
BG	2005-10-06	160.5	807000	190400	1472.06	0.698088	532.391	19.4154	468.391	1.8884	0.623834	0.190896	-2.24833	8.95354	207.562	19.5927	495.554	446.786	446.786	462.553	451.157	451.157	10.5667	808.915	1957.61	5.44853	0.00524081
BG	2005-10-10	152.4	798500	198800	1535.14	0.750726	554.887	19.5948	466.192	1.99737	0.624601	0.199338	-2.2691	8.92856	205.344	18.945	502.334	447.752	447.752	471.427	460.355	460.355	10.5525	810.077	1982.86	5.44873	0.00546284
BG	2005-10-10	152.4	810300	187100	1443.55	0.71773	541.794	19.2329	475.289	1.99174	0.588083	0.187588	-2.27095	8.93872	205.151	18.5992	502.534	449.515	449.515	471.856	461.698	461.698	10.5534	810.803	1957.02	5.44886	0.00513543
BG	2005-12-01	155.7	798300	199000	1532.88	0.933717	537.635	19.1398	483.063	2.05045	0.708744	0.199539	-2.2302	8.85574	209.503	20.5765	532.719	456.476	456.476	508.71	500.789	500.789	10.5036	816.168	2007.47	5.44978	0.00544155
BG	2006-01-09	159.1	809100	188400	1462.16	0.442644	485.102	17.6852	453.203	1.93638	0.658174	0.188872	-2.20503	8.97937	212.235	21.4187	486.552	444.019	444.019	450.227	437.506	437.506	10.6447	799.5	1915.72	5.44688	0.00522538
BG	2006-03-08	162	796600	198400	1488.43	n.a.	n.a.	17.9116	483.878	2.1283	0.685493	0.199397	-2.24503	8.82161	207.911	19.9376	548.538	460.439	460.439	526.138	519.103	519.103	10.5012	816.479	2008.34	5.44984	0.0052831
BG	2006-03-13	161.7	812400	185300	1355.32	0.578686	505.461	17.5644	453.709	1.91129	0.619121	0.185727	-2.22311	8.98873	210.279	20.5378	484.181	443.651	443.651	447.022	434.161	434.161	10.6259	802.01	1918.18	5.44732	0.00483862
BG	2006-04-24	163.3	804600	193000	1487.29	0.927559	513.389	17.1156	442.959	1.94399	0.720714	0.193464	-2.16858	8.9847	216.212	23.2548	483.149	442.112	442.112	445.157	431.345	431.345	10.6739	795.627	1911.24	5.44619	0.00532358
BG	2006-05-22	161.7	797300	200300	1364.61	0.575841	507.574	17.3949	464.052	2.08802	0.649083	0.200782	-2.25433	8.87896	206.917	19.5828	522.079	453.434	453.434	496.303	487.452	487.452	10.5307	812.684	1996.79	5.44918	0.00485096
BG	2006-06-21	163	801700	195900	1400.82	1.027	511.06	17.9412	444.775	1.96668	0.723246	0.196371	-2.17688	8.9853	215.297	22.9338	482.06	441.279	441.279	443.447	429.119	429.119	10.6179	802.229	1944.45	5.44736	0.00500064
BG	2006-07-21	163	803000	194600	1370.2	0.929031	509.695	17.4674	451.834	2.01415	0.737243	0.195068	-2.1718	8.95203	215.856	23.1431	494.715	445.892	445.892	461.293	449.413	449.413	10.5967	804.916	1951.95	5.44783	0.00488602
BG	2006-09-06	160.9	803700	194100	1375.52	0.674237	450.626	15.4151	411.008	1.85272	0.637115	0.194528	-2.19256	9.0649	213.585	22.1402	455.901	430.969	430.969	402.843	381.873	381.873	10.7725	783.799	1866.45	5.44408	0.0049475
BG	2006-09-27	159.7	796300	201100	1519.9	0.634907	533.022	18.6029	488.273	2.15425	0.665393	0.201624	-2.26792	8.81582	205.469	19.0467	550.273	460.574	460.574	528.21	521.178	521.178	10.4815	818.804	2023.14	5.45024	0.00538985
BG	2006-10-23	162.3	798900	198600	1509.16	0.495718	498.459	17.9113	469.43	2.02659	0.640251	0.199098	-2.26071	8.87883	206.237	19.2795	522.789	453.86	453.86	497.089	488.396	488.396	10.5576	809.461	1979.83	5.44862	0.00537172
BG	2006-10-27	162.9	801300	196200	1456.37	0.471816	498.888	17.4674	448.688	1.96625	0.635434	0.196692	-2.23778	8.95693	208.691	20.1786	492.339	444.854	444.854	457.993	445.576	445.576	10.6265	801.158	1940.97	5.44717	0.00520119
BG	2006-11-13	162.1	810000	187500	1473.13	0.834936	526.646	17.8294	468.553	2.13829	0.604401	0.18797	-2.25395	8.92904	206.963	19.2915	506.259	450.612	450.612	476.627	466.901	466.901	10.5999	805.031	1935.34	5.44785	0.0052528
BG	2006-12-14	157.2	799100	198200	1675.23	0.75119	546.064	18.8617	471.67	2.00233	0.608482	0.198737	-2.28389	8.89433	203.779	18.346	516.379	452.093	452.093	489.306	480.009	480.009	10.5849	806.105	1965.61	5.44804	0.00597086
BG	2007-01-18	162.2	804500	193200	1349.55	0.765995	475.047	15.834	443.876	1.83619	0.645424	0.193645	-2.2179	8.94664	210.835	20.9661	497.253	446.939	446.939	464.758	453.394	453.394	10.6454	799.065	1925.33	5.4468	0.0048238
BG	2007-02-16	159.2	807000	190800	1280.05	0.745454	476.336	13.5213	431.049	1.68021	0.603412	0.191221	-2.22762	8.93983	209.788	20.4792	500.751	448.423	448.423	469.457	458.791	458.791	10.7106	791.384	1889.08	5.44544	0.00458976
BG	2007-03-12	161.4	786300	211100	1549.28	1.33162	573.389	13.9172	526.624	2.24175	0.735027	0.21165	-2.2841	8.51541	203.754	18.6374	740.174	489.526	489.526	677.747	664.741	664.741	10.3873	830.148	2094.1	5.45217	0.00546969
BG	2007-04-18	160.1	779600	217600	1668.62	1.38084	593.332	11.257	555.025	2.40939	0.738802	0.218211	-2.32157	8.304	199.833	17.3571	980.92	507.86	507.86	786.749	757.081	757.081	10.3394	835.942	2134.83	5.45314	0.0058779
BG	2007-05-08	162.5	784900	212600	1516.45	0.892502	525.48	8.90894	504.217	2.27014	0.788826	0.213133	-2.23839	8.39105	208.612	20.5684	869.292	500.807	500.807	741.051	719.146	719.146	10.5034	815.262	2038.51	5.44963	0.00538516
BG	2007-05-31	158.7	781100	216400	1456.45	1.05747	511.75	7.93657	488.553	2.33143	0.758548	0.216942	-2.25148	8.37956	207.21	20.1035	876.961	501.275	501.275	747.319	724.852	724.852	10.5338	811.191	2031.96	5.44892	0.00518051
BG	2007-06-07	161.9	783600	214100	1492.27	0.464027	449.73	7.21461	439.428	2.02578	0.742426	0.214594	-2.20876	8.53242	211.8	21.9338	722.16	487.39	487.39	668.923	657.114	657.114	10.7375	786.528	1925.36	5.44457	0.00536138
BG	2007-07-17	161.3	777000	220400	1595.79	1.03245	504.39	8.28136	487.17	2.29548	0.946203	0.220975	-2.16449	8.38585	216.61	24.2595	861.998	500.096	500.096	744.455	723.012	723.012	10.5564	808.108	2029.91	5.44839	0.00568315
BG	2007-09-10	163.5	764500	232900	1642.41	1.10596	524.297	10.6951	479.5	2.32179	0.877139	0.233507	-2.22151	8.47237	210.4	21.8696	751.939	490.012	490.012	699.743	686.056	686.056	10.5101	813.06	2083.6	5.44925	0.00583761
BG	2007-10-17	162.9	770200	227300	1537.55	0.79088	503.588	11.9415	457.339	2.26186	0.832391	0.22787	-2.20991	8.62592	211.658	22.2492	640.548	475.648	475.648	619.193	611.721	611.721	10.563	806.827	2042.75	5.44816	0.00547856
BG	2007-11-08	162	764400	232800	1534.61	2.72883	668.513	15.8518	559.255	2.86308	0.804542	0.233454	-2.32572	8.37594	199.403	17.5472	850.709	499.13	499.13	750.995	730.119	730.119	10.1752	856.813	2261.61	5.45651	0.00536395
BG	2007-12-03	161.6	770200	227300	1532.75	0.948247	539.375	14.062	443.789	2.17713	0.766803	0.22787	-2.23249	8.74915	209.229	21.2171	570.066	462.386	462.386	554.619	547.635	547.635	10.5792	804.828	2034.51	5.44781	0.00546585
BG	2008-01-10	162.2	765200	232300	1545.2	0.889819	536.478	14.6516	470.781	2.44965	0.989938	0.232882	-2.15949	8.64366	217.133	24.883	625.297	472.862	472.862	609.182	602.16	602.16	10.4628	819.073	2106.68	5.45028	0.005479
BG	2008-02-05	160.5	765500	232000	1518.9	0.529622	507.439	14.3906	453.361	2.29825	0.855952	0.232581	-2.20554	8.70259	212.123	22.5891	591.529	466.596	466.596	578.127	571.451	571.451	10.5183	812.096	2077.11	5.44908	0.00540067
BG	2008-02-11	161.5	770000	227600	1496.47	0.581847	493.833	14.0161	432.118	2.18781	0.831475	0.228148	-2.18644	8.79301	214.2	23.3802	548.719	457.357	457.357	531.57	523.591	523.591	10.6094	801.086	2019.77	5.44716	0.00534456
BG	2008-03-17	162.5	772800	224700	1507.97	0.4771	479.956	14.4027	454.807	2.19289	0.898556	0.225263	-2.16782	8.7278	216.236	24.2207	582.616	465.279	465.279	566.383	559.71	559.71	10.5405	809.805	2048.1	5.44868	0.00536672
BG	2008-04-02	162.5	780200	217400	1479.7	0.801018	475.127	13.9652	427.626	2.09725	0.947177	0.217923	-2.09969	8.85235	223.786	27.6537	526.825	452.616	452.616	503.595	494.262	494.262	10.6641	795.109	1968.89	5.4461	0.00529751
BG	2008-05-13	164	769100	228300	1567.69	0.585724	530.487	15.7051	504.932	2.50995	0.978955	0.228895	-2.18499	8.56853	214.356	23.473	679.188	481.324	481.324	649.169	639.994	639.994	10.3639	832.035	2148.59	5.45248	0.00553065
BG	2008-06-11	163	764800	232500	1622.63	0.934645	555.261	15.6362	511.911	2.63968	0.977672	0.233129	-2.20188	8.52512	212.518	22.7792	707.771	484.921	484.921	671.807	661.014	661.014	10.3409	834.77	2171.59	5.45294	0.00571847
BG	2008-07-15	160.3	766800	230500	1605.17	1.43322	585.319	14.9517	526.023	2.50821	0.817586	0.231124	-2.28646	8.46673	203.499	19.0113	760.425	490.942	490.942	702.679	688.422	688.422	10.3104	838.894	2182.64	5.45362	0.00564803
BG	2008-09-17	163	769000	229000	1490	0.822	505	13.3	463	2.27	0.885	0.229459	-2.19255	8.6454	213.534	23.1211	626.945	473.318	473.318	608.752	601.695	601.695	10.5057	813.881	2076.03	5.44939	0.00529415
BG	2008-10-09	163.7	772000	226000	1490	1.36	544	14	480	2.36	0.795	0.226453	-2.24737	8.61752	207.64	20.525	647.23	476.779	476.779	623.775	616.054	616.054	10.4528	820.769	2096.09	5.45057	0.00527973
BG	2008-11-17	164.8	761000	237000	1500	0.818	540	15.2	483	2.15	0.845	0.237475	-2.25045	8.59685	207.301	20.6823	651.064	476.913	476.913	633.483	625.617	625.617	10.385	828.752	2159.29	5.45193	0.00529858
BG	2008-12-17	162.7	774000	223000	1580	0.935	533	15.2	471	2.24	0.783	0.223671	-2.23882	8.69642	208.555	20.8243	600.824	469.009	469.009	583.096	576.489	576.489	10.5022	814.699	2063.88	5.44953	0.00561211
BG	2009-01-15	163.8	770000	227000	1580	0.673	492	14.2	433	2.01	0.726	0.227683	-2.24509	8.79627	207.882	20.6563	547.438	457.078	457.078	529.976	521.93	521.93	10.6284	798.793	2009.06	5.44675	0.00564813
BG	2009-02-24	163.1	768000	230000	1550	0.992	526	14.9	467	2.35	0.788	0.230461	-2.24916	8.67564	207.446	20.5526	608.115	469.92	469.92	592.699	585.992	585.992	10.484	816.547	2089.69	5.44985	0.00550151
BG	2009-03-10	163.3	779000	218000	1530	1.15	503	13.9	430	2.1	0.762	0.218656	-2.19843	8.83683	212.913	22.529	533.256	454.287	454.287	511.417	502.647	502.647	10.6672	794.688	1969	5.44603	0.00547855
BG	2009-04-15	163.5	767000	230000	1530	1.25	518	13.2	444	2.21	0.953	0.230692	-2.14522	8.7085	218.704	25.5627	589.582	466.319	466.319	575.371	568.703	568.703	10.5773	804.872	2042.16	5.44782	0.00545595
BG	2009-05-15	n.m.	775000	222000	1500	0.69	453	11.4	408	2.06	0.856	0.222668	-2.13524	8.82512	219.824	25.839	536.713	454.789	454.789	516.287	507.633	507.633	10.7602	783.288	1931.88	5.44399	0.00539636
BG	2009-06-22	162.8	772000	225000	1490	0.759	544	12.9	492	2.41	0.801	0.225677	-2.2529	8.54102	207.052	20.2667	703.451	484.628	484.628	663.79	653.241	653.241	10.4303	823.694	2105.88	5.45107	0.00527366
BG	2009-07-14	163	765000	232000	1510	0.556	558	13.1	489	2.27	0.774	0.232698	-2.28239	8.52919	203.925	19.2146	705.047	484.592	484.592	669.668	659.041	659.041	10.414	825.326	2131.83	5.45135	0.00534103
BG	2009-09-23	162	768000	230000	1640	0.608	520	12.3	477	2.46	1.1	0.230461	-2.11349	8.55555	222.213	27.2949	687.225	482.352	482.352	655.879	646.279	646.279	10.5099	813.291	2076.3	5.44929	0.00582849
BG	2009-10-19	162.3	759000	239000	1570	0.796	545	12.3	489	2.6	1.02	0.239479	-2.17886	8.47524	215.003	24.0977	740.906	488.764	488.764	698.345	685.338	685.338	10.4146	824.811	2148.71	5.45126	0.00555438
BG	2009-11-24	n.m.	753000	244000	1720	2.24	605	12.1	461	2.5	0.966	0.244734	-2.18932	8.54777	213.858	23.7364	676.957	480.675	480.675	659.334	650.213	650.213	10.527	810.23	2102.69	5.44876	0.00612029
BG	2009-12-21	161.5	774000	224000	1380	0.871	512	11.2	446	2.4	0.813	0.224449	-2.20075	8.65659	212.653	22.5832	623.828	473.091	473.091	603.693	596.715	596.715	10.5809	804.842	2025.6	5.44782	0.00492111
BG	2010-01-05	163.3	765000	233000	1430	0.656	512	11.5	455	2.45	0.98	0.233467	-2.15048	8.59594	218.12	25.3729	655.487	477.723	477.723	634.328	626.287	626.287	10.5232	811.425	2076.73	5.44896	0.00508595
BG	2010-02-23	163.7	766000	231000	1310	0.472	526	12.5	458	2.43	0.96	0.231695	-2.15798	8.62675	217.301	24.9239	636.836	474.855	474.855	618.258	610.913	610.913	10.467	818.618	2101.56	5.45021	0.00464585
BG	2010-03-17	164.2	765000	233000	1250	1.16	575	13.5	465	2.53	0.94	0.233467	-2.17802	8.62781	215.107	23.9562	634.664	474.419	474.419	617.478	610.199	610.199	10.4034	826.631	2139.32	5.45157	0.00441913
BG	2010-04-14	161.3	772000	225000	1310	0.6	540	13.5	454	2.55	1.07	0.225677	-2.09224	8.7004	224.595	28.3516	597.286	468.184	468.184	580.609	574.005	574.005	10.492	815.852	2073.94	5.44973	0.00465094
BG	2010-05-10	n.m.	760000	238000	1410	0.516	527	13.8	453	2.53	1.04	0.238477	-2.13483	8.66216	219.831	26.3785	609.822	469.854	469.854	598.613	591.838	591.838	10.4717	817.595	2116.04	5.45003	0.00500252
BG	2010-06-16	162.7	772000	226000	1320	0.856	555	14.5	448	2.45	1.02	0.226453	-2.10917	8.75262	222.705	27.4032	569.115	462.286	462.286	553.136	546.151	546.151	10.5002	814.765	2071.58	5.44954	0.00468847
BG	2010-07-09	163.6	771000	227000	1150	0.626	508	13.7	412	2.28	1.09	0.227455	-2.04644	8.86932	229.736	31.2159	515.985	448.503	448.503	491.822	480.693	480.693	10.5763	805.215	2035.01	5.44788	0.00410031
BG	2010-09-15	n.m.	776000	222000	1130	0.548	521	14.8	431	2.36	0.827	0.222445	-2.17346	8.84545	215.625	23.8522	527.947	452.443	452.443	505.76	496.31	496.31	10.5046	814.483	2059.75	5.44949	0.00401407
BG	2010-10-21	163.6	762000	235000	1160	0.77	558	15.6	459	2.5	0.857	0.235707	-2.21794	8.70263	210.781	22.0963	589.382	465.991	465.991	577.559	570.834	570.834	10.3524	833.097	2172.08	5.45266	0.00409069
BG	2010-11-29	162	753000	245000	1260	0.676	536	14.8	464	2.61	0.969	0.245491	-2.19257	8.6222	213.505	23.5988	627.263	472.833	472.833	619.213	612.078	612.078	10.3436	833.631	2202.46	5.45275	0.00444242
BG	2010-12-07	162.5	765000	233000	1220	0.684	540	14.8	463	2.62	0.857	0.233467	-2.21629	8.67523	210.961	22.1096	606.165	469.391	469.391	592.422	585.715	585.715	10.3822	829.373	2150.53	5.45204	0.00430848
BG	2011-01-20	165.2	758000	240000	1290	0.48	489	13.7	437	2.41	0.9	0.240481	-2.18678	8.71326	214.141	23.7326	580.468	463.909	463.909	571.12	564.202	564.202	10.4818	816.184	2115.75	5.44979	0.00457933
BG	2011-03-15	162	762000	235000	1180	0.572	523	15.4	462	2.42	1.008	0.235707	-2.15029	8.6857	218.135	25.4547	598.621	467.835	467.835	586.522	579.834	579.834	10.3525	833.083	2172.02	5.45266	0.00416124
BG	2011-05-02	163.2	765000	232000	1170	0.625	529	16.2	474	2.49	0.976	0.232698	-2.16816	8.67556	216.185	24.4312	606.539	469.501	469.501	592.37	585.665	585.665	10.3115	838.644	2186.11	5.45358	0.00411721
BG	2011-05-24	163.6	757000	241000	1130	0.591	464	13.9	440	2.32	1.039	0.241483	-2.12976	8.70357	220.382	26.7591	584.792	464.79	464.79	576.125	569.275	569.275	10.4068	825.686	2158.01	5.45141	0.00399637
BG	2011-06-10	163	768000	230000	1010	0.695	515	15.8	471	2.52	0.975	0.230461	-2.16038	8.68629	217.04	24.7607	602.02	468.775	468.775	587.095	580.438	580.438	10.2731	843.862	2200.82	5.45444	0.00354717
BG	2011-07-25	163.9	772000	226000	1240	0.527	513	16.6	468	2.39	0.925	0.226453	-2.1706	8.73549	215.93	24.1165	577.88	464.192	464.192	562.098	555.332	555.332	10.3782	830.344	2134.96	5.4522	0.00437746
BG	2011-09-12	163.1	766000	231000	1280	0.5	457	15.4	430	2.32	0.937	0.231695	-2.14111	8.82695	219.155	25.8147	531.85	452.671	452.671	512.866	503.386	503.386	10.514	812.698	2077.19	5.44918	0.00455014
BG	2011-11-04	162.4	763000	235000	1440	0.51	501	17.2	449	2.25	0.851	0.235471	-2.21086	8.78557	211.544	22.4207	548.354	456.724	456.724	533.752	525.528	525.528	10.4606	819.187	2114.29	5.4503	0.00510574
BG	2011-11-29	163	769000	229000	1280	0.403	416	14.3	383	1.9	1.12	0.229459	-2.00789	9.00641	234.105	33.8475	466.025	430.696	430.696	420.044	397.917	397.917	10.7164	788.045	1968.86	5.44484	0.00459586
BG	2012-01-13	160.8	758000	240000	1350	0.547	532	17.8	500	2.45	1.049	0.240481	-2.17874	8.59301	215.015	24.1351	650.638	476.777	476.777	635.285	627.422	627.422	10.2415	847.434	2244.43	5.45502	0.00473494
BG	2012-01-31	160.7	767000	231000	1310	0.45	481	15.8	455	2.19	1.098	0.231463	-2.09623	8.74218	224.132	28.3218	571.503	462.445	462.445	557.489	550.481	550.481	10.4347	822.744	2117.85	5.45091	0.0046383
BG	2012-03-01	n.m.	759000	238000	1280	0.517	521	16.7	516	2.5	1.18	0.238716	-2.1371	8.51651	219.579	26.2622	707.807	484.833	484.833	676.258	665.43	665.43	10.1894	854.554	2268.11	5.45616	0.00447768
BG	2012-04-19	165.4	766000	232000	1270	0.514	484	14.1	502	2.2	1.048	0.232465	-2.1616	8.51783	216.902	24.7603	714.412	485.754	485.754	675.681	664.479	664.479	10.2874	841.847	2198.42	5.45411	0.00446369
BG	2012-05-02	164.1	764000	234000	1290	0.512	490	14.2	499	2.33	1.037	0.234469	-2.16844	8.52304	216.15	24.4713	707.838	484.9	484.9	672.868	662.067	662.067	10.294	840.844	2200.1	5.45395	0.0045357
BG	2012-06-05	165	772000	226000	1420	0.515	470	12.8	502	2.21	1.122	0.226453	-2.1172	8.50076	221.812	26.9511	735.987	488.431	488.431	684.785	672.196	672.196	10.377	830.496	2135.58	5.45223	0.0050126
BG	2012-07-13	162.5	757000	240000	1370	0.476	521	14	529	2.48	1.462	0.240722	-2.05962	8.38848	228.202	30.8894	822.493	496.861	496.861	745.065	726.045	726.045	10.2042	852.434	2265.5	5.45582	0.00479623
BG	2012-08-23	164.8	762000	236000	1350	0.453	489	12.9	503	2.31	1.05	0.236473	-2.17134	8.45923	215.83	24.386	759.605	490.8	490.8	706.817	692.556	692.556	10.3092	838.704	2197.16	5.45359	0.00475051
BG	2012-09-21	n.m.	746000	252000	1250	0.449	485	13.2	507	2.44	1.174	0.252505	-2.164	8.3901	216.596	25.2764	796.608	494.906	494.906	745.453	727.796	727.796	10.1942	853.054	2303.77	5.45592	0.00437513
BG	2012-10-25	163.9	757000	241000	1250	0.394	469	13	490	2.35	1.109	0.241483	-2.14819	8.48753	218.353	25.7547	727.596	487.235	487.235	691.789	679.65	679.65	10.2952	840.241	2217.98	5.45385	0.00439606
BG	2012-11-09	162.6	744000	253000	1250	0.487	460	12.7	439	1.96	1.073	0.253761	-2.14341	8.61712	218.848	26.4243	621.959	471.911	471.911	621.345	614.25	614.25	10.4199	823.242	2183.23	5.451	0.00442499
BG	2012-11-09	162.6	754000	243000	1420	0.541	510	14.4	527	2.48	1.121	0.243731	-2.18044	8.395	214.824	24.1498	809.703	495.787	495.787	741.849	723.671	723.671	10.2086	851.647	2271.3	5.4557	0.00497271
BG	2012-12-13	162.3	762000	236000	1370	0.465	465	13.8	480	2.2	1.279	0.236473	-2.06533	8.56982	227.575	30.369	670.567	479.861	479.861	647.934	639.199	639.199	10.3775	829.793	2160.72	5.45211	0.00483742
BG	2013-01-10	163.3	768000	230000	1330	0.472	451	14	454	2.14	1.095	0.230461	-2.09401	8.69762	224.382	28.4162	595.681	467.549	467.549	581.135	574.493	574.493	10.4732	817.917	2095.31	5.45009	0.00471809
BG	2013-02-05	162.6	757000	241000	1360	0.429	481	15.2	490	2.36	1.042	0.241483	-2.17525	8.55543	215.393	24.3426	675.315	480.455	480.455	655.344	646.342	646.342	10.3038	839.101	2213.3	5.45366	0.00478498
BG	2013-03-28	n.m.	754000	243000	1440	0.419	468	15.3	480	2.26	1.099	0.243731	-2.14848	8.58361	218.316	25.8129	653.484	477.177	477.177	640.097	632.096	632.096	10.3487	833.076	2195.04	5.45266	0.00507814
BG	2013-04-16	161.7	758000	240000	1450	0.387	517	16.1	517	2.38	1.294	0.240481	-2.1021	8.49133	223.451	28.2987	725.841	487.026	487.026	689.735	677.729	677.729	10.2418	847.395	2244.27	5.45501	0.00508575
BG	2013-05-28	163.2	752000	246000	1480	0.449	499	15.5	536	2.56	1.18	0.246493	-2.172	8.38761	215.737	24.6664	811.78	496.062	496.062	746.156	727.679	727.679	10.1773	855.715	2296.27	5.45634	0.00517513
BG	2013-06-20	165.3	756000	242000	1470	0.481	502	15.2	532	2.4	1.311	0.242485	-2.1136	8.40847	222.167	27.7044	798.344	494.703	494.703	734.441	717.18	717.18	10.2059	852.099	2269.4	5.45577	0.00514695
BG	2013-07-26	163.4	742000	255000	1560	0.858	539	15.7	564	2.44	1.413	0.255767	-2.13727	8.26586	219.517	26.8324	930.808	505.98	505.98	814.856	785.988	785.988	10.0796	868.562	2377.81	5.45832	0.00543009
BG	2013-08-23	164.5	737000	260000	1620	0.435	522	15.4	574	2.5	1.297	0.260782	-2.19348	8.20677	213.378	24.028	996.057	510.616	510.616	849.369	814.384	814.384	10.0516	872.165	2408.82	5.45885	0.00563197
BG	2013-09-23	164.2	746000	251000	1420	0.386	457	13.9	519	2.19	1.303	0.251755	-2.12716	8.37363	220.642	27.259	814.88	496.581	496.581	754.425	735.369	735.369	10.206	851.51	2295.09	5.45567	0.00497296
BG	2013-10-17	165	733000	265000	1440	0.363	489	14.9	561	2.46	1.329	0.265531	-2.18358	8.2145	214.439	24.6835	964.072	509.259	509.259	846.252	812.862	812.862	10.0242	875.726	2439.15	5.45938	0.00500019
BG	2013-11-27	163.9	742000	255000	1590	0.562	527	15.9	593	2.63	1.349	0.255767	-2.17918	8.18425	214.937	24.5937	1055.28	513.313	513.313	860.699	822.191	822.191	10.0072	878.682	2419.22	5.4598	0.00551562
BG	2013-12-17	162.5	739000	259000	1600	0.515	486	14.9	554	2.48	1.243	0.259519	-2.19369	8.26043	213.357	23.9773	924.992	505.94	505.94	818.74	789.773	789.773	10.1138	863.619	2369.44	5.45757	0.00557894
BG	2014-01-27	162.5	741000	256000	1480	0.538	490	15.9	557	2.37	1.291	0.25677	-2.17335	8.28901	215.568	24.9269	897.558	503.719	503.719	802.131	775.834	775.834	10.0699	869.841	2386.28	5.45851	0.00514935
BG	2014-02-19	163	750000	248000	1410	0.404	431	14.3	507	2.23	1.28	0.248497	-2.11719	8.4411	221.753	27.7109	756.556	490.634	490.634	717.187	702.812	702.812	10.2492	845.916	2262.12	5.45477	0.00494818
BG	2014-03-20	162.5	742000	255000	1480	0.405	462	15.1	524	2.37	1.272	0.255767	-2.15098	8.37673	218.013	26.0801	802.592	495.677	495.677	753.211	734.832	734.832	10.1784	855.006	2321.95	5.45623	0.00517646
BG	2014-04-01	162.7	751814	245802	1422.16	0.344087	433.3	15.9027	510.07	2.20973	1.20273	0.246389	-2.14194	8.48481	219.028	26.2553	722.7	486.7	486.7	693.349	681.431	681.431	10.232	848.342	2265.76	5.45517	0.00498637
BG	2014-05-26	164.2	733071	264186	1642.13	0.557444	520.547	17.2408	560.456	2.43613	1.3097	0.264913	-2.18813	8.28106	213.948	24.4303	880.583	503.271	503.271	808.268	782.18	782.18	10.0582	871.003	2417.53	5.45868	0.00571115
BG	2014-06-06	163.8	742625	254698	1590.71	0.550645	507.755	16.9436	558.599	2.44864	1.28056	0.255381	-2.17496	8.31766	215.397	24.7987	867.166	501.277	501.277	785.91	762.28	762.28	10.0912	866.975	2370.07	5.45808	0.00554003
BG	2014-07-11	165.3	746585	250758	1535.26	0.447867	522.767	18.0974	577.203	2.51495	1.33831	0.251426	-2.16095	8.30536	216.932	25.402	893.227	502.99	502.99	792.016	766.704	766.704	10.0286	875.931	2394.03	5.45941	0.00533061
BG	2014-08-21	163.6	751673	245793	1430.59	0.670655	511.385	17.709	569.893	2.38072	1.36688	0.246417	-2.1346	8.33857	219.835	26.6587	866.194	500.66	500.66	772.911	750.186	750.186	10.0422	874.316	2371.59	5.45917	0.00496986
BG	2014-09-23	163.2	755757	241763	1363.69	0.470678	509.502	16.6058	586.647	2.45085	1.30689	0.242364	-2.15714	8.27689	217.369	25.3075	958.186	506.881	506.881	805.888	776.463	776.463	10.0049	879.798	2380.89	5.45996	0.00472883
BG	2014-10-17	163.9	743734	253531	1617.38	0.598771	519.284	17.0605	577.786	2.43244	1.36209	0.254226	-2.16018	8.26656	217.01	25.5353	935.072	506.135	506.135	814.123	785.13	785.13	10.0493	872.86	2390.48	5.45896	0.00562155
BG	2014-10-30	163.5	749387	247862	1601.76	0.567861	524.843	17.0367	604.808	2.49854	1.50215	0.248546	-2.12441	8.20953	220.954	27.3019	1043.19	512.052	512.052	844.509	808.141	808.141	9.99716	880.519	2403.39	5.46006	0.00555306
BG	2014-12-10	161.7	755071	242338	1546.53	0.448192	473.046	15.1441	551.667	2.24036	1.37105	0.242968	-2.11106	8.34107	222.448	27.8675	871.525	500.938	500.938	771.026	748.126	748.126	10.1691	857.045	2290.98	5.45655	0.00540516
BG	2015-01-13	162.2	753495	243479	1560.82	4.42521	838.663	16.3776	603.342	2.40274	1.37862	0.244218	-2.1505	8.21386	218.093	25.7207	1052.87	512.26	512.26	840.965	804.519	804.519	10.0138	878.437	2381.27	5.45977	0.00541484
BG	2015-02-10	162.5	752166	245165	1591.49	0.710021	490.372	15.7618	568.41	2.22225	1.38614	0.245821	-2.126	8.29476	220.786	27.1177	923.028	504.77	504.77	796.799	769.709	769.709	10.1161	864.111	2328.41	5.45764	0.0055483
BG	2015-03-11	161.9	757572	239778	1576.33	0.595314	484.86	15.6995	569.588	2.24497	1.45452	0.240415	-2.09323	8.31153	224.439	28.8187	915.272	504.02	504.02	786.651	760.589	760.589	10.1315	862.332	2304.66	5.45737	0.00549891
BG	2015-04-21	162.1	753620	243800	1514.56	1.11089	492.661	14.9053	554.334	2.24436	1.43466	0.24443	-2.0969	8.31983	224.017	28.7466	894.1	502.678	502.678	782.826	758.081	758.081	10.1492	859.662	2306.06	5.45696	0.00528844
BG	2015-05-19	162.8	761174	236310	1426.61	0.815285	493.738	15.5087	576.546	2.30297	1.40296	0.236906	-2.10579	8.29969	223.051	27.958	940.732	505.597	505.597	792.426	764.714	764.714	10.0858	868.844	2320.17	5.45836	0.00496529
BG	2015-06-18	162.7	744274	253018	1643.63	0.613201	473.344	14.2751	573.362	2.34592	1.54352	0.253705	-2.10134	8.20464	223.495	28.824	1029.98	511.781	511.781	848.636	812.393	812.393	10.1009	865.741	2359.69	5.45789	0.00572681
BG	2015-07-22	163.2	748000	249000	1580	0.689	516	15.2	633	2.52	1.49	0.249749	-2.15052	8.07564	218.078	25.9031	1328.47	523.597	523.597	920.358	865.662	865.662	9.93303	889.553	2443.67	5.46131	0.00546192
BG	2015-08-25	162.3	751000	246000	1530	0.634	472	13.5	574	2.34	1.38	0.24674	-2.13433	8.20631	219.865	26.6849	1056.12	512.585	512.585	845.816	808.795	808.795	10.1044	865.671	2337.59	5.45788	0.00533102
BG	2015-09-01	163.8	752000	245000	1630	0.684	497	13.9	626	2.49	1.53	0.245737	-2.12483	8.07242	220.915	27.1804	1367.21	524.39	524.39	920.7	864.88	864.88	9.99369	881.177	2397.09	5.46016	0.00564977
BG	2015-10-07	161.3	735000	263000	1470	0.634	500	13.8	611	2.42	1.49	0.263527	-2.16652	8.04091	216.297	25.5084	1310.72	524.827	524.827	945.904	887.929	887.929	9.918	890.914	2494.96	5.46149	0.00507954
BG	2015-10-23	161.9	757000	241000	1550	0.501	467	13	553	2.36	1.3	0.241483	-2.1317	8.27741	220.168	26.6514	960.054	506.959	506.959	805.423	775.94	775.94	10.1976	853.276	2271.19	5.45595	0.00542472
BG	2015-11-23	162.4	750000	247000	1530	0.625	466	13.2	583	2.36	1.44	0.247743	-2.12494	8.16545	220.898	27.2438	1128.56	516.053	516.053	868.89	826.761	826.761	10.0789	869.138	2354.79	5.4584	0.0053246
BG	2015-12-17	163	769000	228000	1530	0.709	444	12.9	539	2.18	1.31	0.228686	-2.08633	8.37001	225.247	28.8063	867.001	500.391	500.391	753.595	731.653	731.653	10.2852	842.375	2189.78	5.4542	0.00537644
BG	2016-01-26	163.7	737000	260000	1710	0.762	505	14.1	599	2.35	1.49	0.260782	-2.15175	8.09441	217.917	26.2093	1203.03	520.541	520.541	913.674	863.521	863.521	10.0218	876.337	2426	5.45946	0.00593651
BG	2016-02-24	164.1	746654	250632	1649.53	0.519691	474.397	13.782	572.295	2.33158	1.41938	0.251314	-2.13144	8.20228	220.171	27.0031	1044.12	512.319	512.319	849.308	812.434	812.434	10.1205	863.182	2341.68	5.4575	0.00575253
BG	2016-03-31	163.5	746183	251142	1566.41	0.657632	483.778	13.691	608.215	2.30324	1.48846	0.251815	-2.13839	8.09167	219.404	26.6339	1271.37	521.946	521.946	911.958	860.013	860.013	10.0003	879.884	2411.32	5.45997	0.00543166
BG	2016-04-29	164.8	734372	262611	1783.67	0.652848	535.509	15.1594	678.506	2.73184	1.59024	0.263406	-2.18349	7.89882	214.454	24.6191	1830.97	536.992	536.992	1030.76	947.604	947.604	9.82065	905.025	2552.08	5.46328	0.00613816
BG	2016-05-20	164	742659	254482	1698.29	0.537441	509.928	14.5591	632.669	2.48039	1.62003	0.255212	-2.12652	8.03593	220.703	27.4167	1399.14	526.314	526.314	945.369	885.272	885.272	9.94975	886.849	2450.63	5.46095	0.00587581
BG	2016-06-22	163.6	745175	251932	1669.22	0.534085	529.654	15.3936	676.119	2.73279	1.58096	0.252663	-2.16013	7.955	217.019	25.4863	1732.39	533.543	533.543	991.709	917.31	917.31	9.83866	902.999	2507.28	5.46303	0.00574753
BG	2016-07-06	164.4	743348	253820	1624.78	0.483723	535.016	14.7416	653.893	2.55816	1.63062	0.254541	-2.13649	7.98676	219.607	26.8335	1573.99	530.605	530.605	973.814	905.357	905.357	9.87893	897.051	2489.66	5.46229	0.00560405
BG	2016-08-30	163.1	739148	257850	1840.62	0.69522	503.665	13.1442	641.167	2.55433	1.5835	0.258626	-2.14999	7.95441	218.114	26.2312	1651.75	532.852	532.852	994.84	921.319	921.319	9.96364	884.674	2453.05	5.46065	0.00637261
BG	2016-09-26	163.3	745087	251932	1781.04	0.647084	512.983	14.6237	668.193	2.55827	1.53704	0.252685	-2.16729	7.953	216.237	25.1096	1741.46	533.71	533.71	992.907	918.148	918.148	9.89273	895.165	2475.89	5.46205	0.00614644
BG	2016-10-25	162.9	742337	254837	1744.93	0.517463	459.419	13.3534	604.583	2.32652	1.62916	0.255559	-2.10515	8.07591	223.066	28.6663	1284.73	522.825	522.825	922.386	868.639	868.639	10.0449	873.396	2396.95	5.45904	0.00606377
BG	2016-11-28	163.5	751710	245371	1885.07	0.55418	435.194	12.4336	583.623	2.23219	1.50319	0.246089	-2.10289	8.14445	223.346	28.4538	1181.14	518.11	518.11	880.142	834.92	834.92	10.183	854.962	2291.96	5.45622	0.00659333
BG	2016-12-15	162.5	743031	253995	1798.98	0.594357	494.682	14.1193	662.855	2.5077	1.65337	0.254753	-2.13687	7.94334	219.564	26.8198	1757.08	534.274	534.274	999.605	923.426	923.426	9.90642	893.076	2474.33	5.46178	0.00621225
BG	2017-01-11	163.5	738595	258608	1641.22	0.574711	481.686	13.5322	657.37	2.56336	1.72538	0.259333	-2.12516	7.92111	220.841	27.641	1792.04	535.596	535.596	1015.15	935.589	935.589	9.86737	898.451	2511.45	5.46247	0.00565843
BG	2017-02-20	163.7	748507	248944	1523.2	0.448122	430.216	10.8011	581.019	2.31323	1.625	0.24958	-2.07524	8.07739	226.418	30.2526	1324.86	523.468	523.468	919.292	864.839	864.839	10.102	865.828	2347.07	5.45791	0.00530704
BG	2017-03-16	163.7	723348	273697	1718.95	0.594841	516.915	12.3695	703.605	2.72247	1.76976	0.274508	-2.17734	7.70316	215.097	25.3065	3061.98	552.332	552.332	1162.29	1038.1	1038.1	9.72793	918.119	2644.94	5.46474	0.00589561
BG	2017-04-18	163.7	741002	255957	1876.07	0.498464	491.08	10.8556	659.373	2.60295	1.6852	0.256738	-2.13083	7.83024	220.224	27.2272	2466.47	543.618	543.618	1069.38	971.207	971.207	9.95697	885.731	2451.12	5.46079	0.00649318
BG	2017-05-12	163.8	720275	276720	1765.36	0.533189	521.647	11.6582	702.46	2.81817	1.76017	0.277554	-2.18561	7.6681	214.194	24.9763	3349.74	554.993	554.993	1188.16	1055.66	1055.66	9.73657	916.677	2650.16	5.46458	0.00605689
BG	2017-05-30	163.1	721390	275555	1807.7	0.489645	511.961	11.9323	719.565	2.86261	1.84791	0.2764	-2.17243	7.64092	215.625	25.6309	3988.29	557.463	557.463	1205.91	1066.19	1066.19	9.70968	920.745	2662.63	5.465	0.00619619
BG	2017-07-07	164.1	716018	281136	1753.09	0.548053	457.702	10.4304	622.23	2.649	1.6187	0.281938	-2.17878	7.81328	214.924	25.4838	1851.1	542.089	542.089	1095.35	997.635	997.635	9.92597	888.768	2549.91	5.46121	0.00606175
BG	2017-08-29	164.4	724096	273325	1517.74	0.495157	462.235	10.7392	584.701	2.5708	1.53585	0.274032	-2.15747	7.96574	217.259	26.3563	1410.02	529.983	529.983	995.562	926.56	926.56	9.99274	879.683	2484.27	5.45995	0.00526322
BG	2018-02-12	162	717003	280368	1504.75	0.752071	496.316	13.5721	608.964	2.70905	1.52063	0.281107	-2.19478	7.96864	213.198	24.6214	1317.64	528.863	528.863	997.397	930.031	930.031	9.86502	897.611	2584	5.46236	0.00518922
BG	2018-03-19	162.7	699061	298103	1628.58	0.725161	527.265	14.3454	661.999	2.70199	1.81642	0.29895	-2.19149	7.77698	213.513	25.4025	1590.2	543.305	543.305	1131.34	1028.08	1028.08	9.68758	922.969	2757.69	5.46522	0.00557939
BG	2018-04-18	162.1	725216	271927	1692.53	0.629501	497.817	15.6948	647.552	2.60008	1.66822	0.272706	-2.16301	7.95807	216.658	26.0091	1449.93	530.804	530.804	999.547	928.963	928.963	9.83001	903.154	2577.01	5.46305	0.00582754
BG	2018-06-25	162.8	721942	275142	1685.04	0.638244	522.298	20.7456	681.601	2.61535	1.68714	0.275947	-2.18743	7.97726	214.001	24.8279	1354.73	528.755	528.755	989.531	922.865	922.865	9.68723	924.128	2674.82	5.46533	0.00577135
BG	2018-07-09	162.8	737288	260049	1594.5	0.439816	447.923	17.8927	598.396	2.36313	1.647	0.260743	-2.10771	8.20022	222.766	28.707	1006.33	511.208	511.208	853.079	817.285	817.285	9.95379	885.955	2465.31	5.46082	0.00551825
BG	2018-08-30	163	719784	277069	1796.33	0.876973	567.381	21.9426	751.082	2.91987	1.76889	0.277944	-2.21337	7.82476	211.205	23.5833	1894.24	541.568	541.568	1085.39	989.52	989.52	9.54572	945.503	2769.46	5.46703	0.00612857
BG	2018-09-26	163.5	713139	283759	1874.93	0.529069	501.51	20.5008	699.097	2.6156	1.74664	0.284642	-2.20211	7.89337	212.401	24.3645	1481.41	534.921	534.921	1046.11	965.279	965.279	9.66178	927.53	2721.4	5.46565	0.00641706
BG	2018-10-16	163.8	717967	278888	1851.24	0.56978	517.9	20.0909	751.832	2.66542	1.84797	0.279768	-2.19875	7.7775	212.772	24.3741	2115.83	545.388	545.388	1117.02	1011.1	1011.1	9.56542	942.401	2763.84	5.46683	0.00631881
BG	2018-11-19	163	727474	269433	1796.8	0.600843	506.168	18.6299	768.04	2.62379	1.82662	0.270269	-2.19237	7.74549	213.479	24.3881	2784.82	549.204	549.204	1131.45	1016.71	1016.71	9.5688	942.334	2727.59	5.46682	0.00613303
BG	2018-12-04	163.5	710144	286525	2029.57	0.745157	507.963	19.9171	768.08	2.55582	2.10905	0.287482	-2.16714	7.70582	216.173	26.304	2317.63	550.659	550.659	1170.21	1048.59	1048.59	9.54243	945.576	2806.84	5.46703	0.00692422
BG	2019-01-07	162.9	716306	280349	2018	0.583256	505.67	20.993	796.301	2.69064	2.27588	0.28129	-2.13653	7.69046	219.53	27.7918	2782.01	552.657	552.657	1175.82	1049.51	1049.51	9.49901	952.543	2811.04	5.46742	0.00687866
BG	2019-02-19	162	730444	265874	2383.02	0.919635	487.898	21.6382	782.408	2.36931	2.11301	0.266857	-2.12962	7.79116	220.329	27.6574	2470.7	545.718	545.718	1099.83	994.91	994.91	9.65066	930.087	2665.7	5.46588	0.00815173
BG	2019-03-12	161.2	726653	269668	2313.44	0.782805	509.881	24.4416	827.497	2.54666	2.19038	0.270664	-2.14675	7.73154	218.438	26.8283	2930.68	550.348	550.348	1140.84	1022.88	1022.88	9.51352	950.787	2763.04	5.46733	0.00788732
BG	2019-04-08	161.8	724827	272172	1649.55	0.546052	483.463	26.1228	837.371	2.46728	2.36167	0.272992	-2.12431	7.73144	220.896	28.1893	2800.77	550.088	550.088	1142.49	1024.87	1024.87	9.32734	979.646	2887.31	5.46796	0.00561567
BG	2019-05-21	162.9	699835	295730	2950.08	0.731295	527.327	31.5191	923.185	2.6635	2.58244	0.297047	-2.17916	7.54651	214.848	25.9934	3321.3	563.378	563.378	1290.62	1127.57	1127.57	9.29518	983.877	3003.5	5.46789	0.0100448
BG	2019-06-18	161.7	725078	270884	2650.95	0.6467	495.83	28.5153	859.844	2.40803	2.44478	0.271982	-2.11858	7.72615	221.531	28.4865	2921.31	550.656	550.656	1145.28	1026.25	1026.25	9.47791	956.219	2789.85	5.46758	0.00903271
BG	2019-07-15	162.2	719694	275971	2998.14	0.718576	460.698	26.3724	843.779	2.23555	2.47954	0.277172	-2.11557	7.70396	221.847	28.8609	2879.64	551.961	551.961	1163.68	1040.09	1040.09	9.55485	944.139	2760.97	5.46694	0.0102308
BG	2019-08-05	160.9	713068	282622	2831.45	0.584514	500.235	28.3441	943.363	2.50012	2.58916	0.283845	-2.1596	7.51507	217.002	26.5874	7451.86	567.588	567.588	1301.98	1127.77	1127.77	9.31727	980.832	2935.86	5.46795	0.00963961
BG	2019-09-04	163	715918	279607	2941.54	0.49426	521.363	28.4415	980.222	2.64321	2.82946	0.280864	-2.13131	7.46156	220.104	28.0772	29378.5	572.686	572.686	1339.81	1148.4	1148.4	9.28525	985.992	2944.4	5.46784	0.0100169
BG	2019-10-08	162	689243	305975	3024.04	0.659589	582.912	30.1385	1140.62	2.93395	3.09514	0.307445	-2.21378	7.11836	211.106	24.5403	-7994.88	600.124	600.124	1648.87	1334.36	1334.36	8.94509	1039.91	3279.85	5.46182	0.0104415
BG	2019-11-11	161.9	708582	286864	3009.75	0.615633	506.108	26.014	1008.21	2.65702	2.64008	0.288177	-2.18922	7.34488	213.781	25.148	-17588.1	582.366	582.366	1438.98	1208.76	1208.76	9.23741	993.336	3004.36	5.46757	0.0102557
BG	2019-12-02	160.1	725547	270137	2834.89	0.57066	483.922	26.125	966.914	2.34466	2.63656	0.271308	-2.13527	7.48658	219.695	27.4969	-119829	571.59	571.59	1313	1127.98	1127.98	9.34362	977.158	2870.77	5.46798	0.00965058
BG	2020-01-09	162.8	713802	281537	3097.12	0.789746	503.746	28.8575	1026.92	2.48582	2.9907	0.282855	-2.13172	7.37889	220.053	28.128	-16211.2	579.932	579.932	1406.68	1187.66	1187.66	9.22435	995.572	2991.03	5.46745	0.0105561
BG	2020-02-03	162.3	725622	269783	2998.65	0.63236	491.996	29.0506	1071.74	2.36726	2.94552	0.271028	-2.13123	7.35463	220.14	27.7172	-5112.43	583.709	583.709	1416.95	1186.91	1186.91	9.18939	1001.47	2965.72	5.46708	0.0102292
BG	2020-03-02	160.1	718898	276217	3289.87	0.53329	488.008	29.1755	1072.09	2.24096	3.11006	0.277573	-2.12204	7.32952	221.132	28.4937	-5681.2	585.207	585.207	1443.17	1205.08	1205.08	9.20199	999.278	2983.89	5.46723	0.0112188
BG	2020-04-06	162.4	725879	269033	3457.24	0.57739	486.525	30.2209	1106.75	2.48744	3.11368	0.270409	-2.11972	7.31776	221.41	28.3609	-3977.9	587.28	587.28	1447.46	1203.41	1203.41	9.19591	1000.45	2959.21	5.46716	0.0117916
BG	2020-05-05	161	718417	276396	3551.02	0.646733	481.874	31.0859	1116.73	2.35854	3.44092	0.277837	-2.09643	7.28475	223.963	30.0463	-4265.66	589.424	589.424	1481.81	1226.42	1226.42	9.15894	1006.1	3012.07	5.46672	0.0121237
BG	2020-06-04	163.5	716755	277840	3741.11	0.888875	494.7	31.9329	1132.99	2.45547	3.33227	0.27935	-2.11991	7.26502	221.362	28.687	-4041.22	591.107	591.107	1500.33	1237.37	1237.37	9.14801	1007.8	3025.14	5.46657	0.0127771
BG	2020-07-01	160.6	702044	292171	3987.66	1.02542	519.929	35.6503	1229.83	2.69014	3.52601	0.293871	-2.16184	7.1125	216.733	26.8269	-3356.74	603.566	603.566	1650.77	1326.3	1326.3	8.97034	1035.93	3200.8	5.46263	0.0137434
BG	2020-08-03	160.3	712877	281454	3959.98	0.637168	475.312	36.5986	1189	2.4557	3.48782	0.283059	-2.12902	7.22539	220.349	28.293	-3765.81	594.396	594.396	1538.65	1260.23	1260.23	9.05767	1022.11	3097.74	5.46492	0.013576
BG	2020-09-02	162.5	716994	277513	3763.9	0.632739	486.221	41.3995	1199	2.61335	3.23486	0.279046	-2.15673	7.28049	217.326	26.5737	-4358.89	589.663	589.663	1486.46	1229.66	1229.66	9.01413	1029.1	3108.09	5.46385	0.0129356
BG	2020-10-13	161.2	712383	282269	3774.25	0.591257	456.514	39.0469	1075.09	2.36994	3.10451	0.283787	-2.1374	7.42599	219.427	27.8347	90412.7	575.532	575.532	1369.9	1167.27	1167.27	9.17534	1003.34	3026.03	5.46695	0.0128791
BG	2020-11-03	163.5	715261	279339	3830	0.524	444	34.1	1089	2.548	3.019	0.280856	-2.14883	7.35637	218.184	27.0778	-9053.65	582.266	582.266	1423.44	1195.96	1195.96	9.2016	999.245	2997.38	5.46724	0.0130606
BG	2020-12-01	163	714308	280207	3688	1.784	565	32.3	1195	2.655	2.876	0.281752	-2.21217	7.16779	211.327	23.7647	-2826.44	600.305	600.305	1591.62	1287.54	1287.54	9.04683	1023.86	3099.04	5.46467	0.0126509
BG	2021-01-12	159.1	707992	287444	2992	0.832	471	28.1	1069	2.575	2.814	0.288762	-2.18818	7.27436	213.893	25.2228	-6922.6	588.846	588.846	1499.22	1242.35	1242.35	9.12775	1010.8	3077.24	5.46628	0.0102254
BG	2021-02-02	163.1	723884	271129	3550	0.939	449	25.7	959	2.515	2.615	0.272488	-2.13785	7.48816	219.409	27.393	347264	571.307	571.307	1312.74	1128.41	1128.41	9.45139	960.301	2808.15	5.46774	0.0120918
BG	2021-03-11	164	722111	272853	3523	0.627	463	24.1	1022	2.701	2.484	0.274234	-2.19162	7.3427	213.552	24.5557	-5369.38	584.41	584.41	1429.44	1195.61	1195.61	9.35086	975.909	2877.36	5.46799	0.0119929
BG	2021-04-06	162.7	696069	298727	3559	0.69	539	26.9	1074	2.897	2.753	0.30029	-2.22382	7.20107	210.048	23.7925	-8940.49	593.877	593.877	1571.57	1288.6	1288.6	9.15661	1005.92	3107.96	5.46674	0.0121505
BG	2021-04-06	162.7	717207	277938	3321	0.633	493	24.2	1013	2.822	2.561	0.279294	-2.1855	7.34001	214.202	25.0403	-6819.01	583.994	583.994	1435.75	1201.94	1201.94	9.31877	980.761	2917.03	5.46795	0.0113063
BG	2021-05-04	163.4	713295	282424	2891	0.602	451	21.8	913	2.544	2.589	0.283638	-2.14497	7.45875	218.599	27.3972	18306	572.608	572.608	1344.33	1152.46	1152.46	9.42274	964.288	2868.06	5.46785	0.00984457
BG	2021-06-07	162.4	721382	274731	2416	0.552	478	23.5	967	2.664	2.557	0.275803	-2.15844	7.42312	217.149	26.3654	-16109.5	576.772	576.772	1365.48	1160.51	1160.51	9.27384	987.968	2931.69	5.46778	0.00822837
BG	2021-07-12	0	700426	294948	3047	1.057	525	25.3	1024	3.099	2.654	0.296319	-2.21078	7.27362	211.448	24.314	-15388.3	587.797	587.797	1505.56	1250.35	1250.35	9.19049	1000.59	3068.71	5.46715	0.0103926
BG	2021-08-02	162.5	718476	276850	3194	0.678	479	24.4	972	2.586	2.505	0.27815	-2.17469	7.42013	215.376	25.5706	-21456.6	576.753	576.753	1369.76	1164.2	1164.2	9.3707	972.646	2879.88	5.46798	0.0108731
BG	2021-09-01	162.3	724955	270252	3341	0.507	452	22.6	973	2.605	2.526	0.271554	-2.15714	7.41113	217.301	26.2877	-8865.19	578.398	578.398	1371.54	1161.71	1161.71	9.42642	964.22	2820.21	5.46785	0.011377
BG	2021-10-04	163.3	715517	279557	3387	0.561	487	22.4	1025	2.762	2.459	0.280941	-2.21182	7.27936	211.367	23.7563	-4679.74	589.502	589.502	1488.91	1232.1	1232.1	9.3132	981.578	2926.99	5.46794	0.0115313
BG	2021-11-02	161.6	714863	280164	3552	0.449	468	21.4	928	2.544	2.504	0.281564	-2.1621	7.4297	216.735	26.3684	-262938	575.467	575.467	1365.1	1163.34	1163.34	9.49635	952.943	2813.74	5.46744	0.012107
BG	2021-12-06	161.9	717083	278052	3404	0.579	473	22.9	961	2.753	2.43	0.279411	-2.18567	7.40709	214.184	25.0354	-18595.6	577.785	577.785	1381.14	1171.34	1171.34	9.42094	964.742	2853.07	5.46786	0.0115912
BG	2022-01-03	162.7	719524	275384	3800	0.456	424	19.8	845	2.523	2.328	0.276793	-2.14277	7.57748	218.858	27.2714	6129.47	562.919	562.919	1250.71	1093.73	1093.73	9.70484	921.449	2666.97	5.46507	0.013023
BN	1995-03-09	n.m.	828300	169900	883	n.a.	547	5.39	272	0.92	0.41	0.170206	-2.13379	9.43587	220.104	24.3329	369.082	372.445	372.445	217.01	148.709	148.709	11.5177	704.748	1493.73	5.42907	0.00328766
BN	1995-04-22	146	826300	172000	818	n.a.	n.a.	n.a.	n.a.	n.a.	n.a.	0.172293	#VALUE!	#VALUE!					nn
BN	1995-04-28	n.m.	821300	176900	846	n.a.	587	5.29	263	1.47	0.17	0.177219	-2.52273	9.45391	179.764	10.7448	365.016	367.456	367.456	207.111	134.961	134.961	11.5234	703.569	1501.53	5.42883	0.00315165
BN	1995-05-26	n.m.	810100	188100	869	n.a.	609	7.72	255	1.42	0.3	0.188439	-2.29527	9.62122	202.579	17.6804	336.916	329.576	336.916	146.872	62.6542	146.872	11.474	707.629	1539.5	5.42966	0.00323115
BN	1997-12-16	n.m.	819300	178500	1040	n.a.	663	22.8	374	1.36	n.a.	0.178894	#VALUE!	9.46858			362.211	364.098	364.098	199.87	125.573	125.573	10.7485	787.783	1846.59	5.4448	0.00373454
BN	1998-01-27	149	821700	176000	1080	n.a.	669	23.4	381.1	1.41	n.a.	0.176406	#VALUE!	9.4584			364.27	366.623	366.623	204.991	132.401	132.401	10.7409	788.86	1845.23	5.44499	0.00387646
BN	1998-05-28	150	822900	175000	1090	0.5	595	25.7	393	1.55	0.6641	0.175368	-2.09985	9.45071	223.887	26.2757	365.776	368.418	368.418	208.87	137.484	137.484	10.6744	796.895	1874.23	5.44642	0.00389951
BN	1998-06-23	154.3	827600	170300	1039	n.a.	614	23.97	379	1.01	0.686072	0.170658	-2.05566	9.50518	228.893	28.6373	356.463	357.106	356.463	181.389	103.996	181.389	10.7502	788.195	1829.85	5.44487	0.00373032
BN	1998-07-29	153.5	828600	169200	1090	0.535	597	26.9	412	1.57	0.6547	0.169573	-2.10891	9.41514	222.885	25.612	373.154	376.947	376.947	227.748	162.695	162.695	10.6195	803.982	1888.44	5.44767	0.00388831
BN	1998-08-20	152.7	839600	158400	1040	0.47	566	26.2	396	1.5	n.a.	0.158717	#VALUE!	9.52406			354.28	354.27	354.28	174.352	97.1588	174.352	10.7147	793.321	1823.5	5.44578	0.00372606
BN	1998-10-15	148.15	835800	162300	1013.32	0.458688	472.829	22.2413	335.631	1.27098	0.574365	0.162609	-2.05489	9.7218	229.008	28.4216	323.924	302.726	323.924	120.914	39.9862	120.914	10.9718	763.278	1715.35	5.44035	0.00367614
BN	1998-11-16	146	850300	147900	602	0.792	645	30.8	446	1.58	0.515	0.148167	-2.17792	9.43953	215.249	21.6163	371.35	376.212	376.212	220.265	156.322	156.322	10.3066	845.291	1993.41	5.45467	0.00211312
BN	1998-12-16	147	834300	163400	1163.79	0.972984	582.116	28.329	414.854	1.38934	0.57	0.163777	-2.15395	9.45269	217.877	23.1514	366.623	369.953	369.953	209.509	140.085	140.085	10.6466	801.125	1864.44	5.44716	0.00415635
BN	1999-01-15	147.1	839300	158500	1164	0.81	545	31.4	416	1.36	0.523643	0.158849	-2.17617	9.5162	215.429	21.9665	355.633	356.14	355.633	177.137	100.479	177.137	10.6267	803.929	1864.16	5.44766	0.00415238
BN	1999-03-16	146.7	837000	160500	1239	0.843	585	30.3	448	1.52	0.519	0.160902	-2.21886	9.36176	210.757	20.1173	385.36	389.885	389.885	258.563	204.395	204.395	10.5572	812.306	1900.46	5.44912	0.00440509
BN	1999-03-23	146.7	846200	151600	1106	0.593	537	28.6	421	1.49	0.51	0.151934	-2.16994	9.48843	216.126	22.0798	361.401	363.963	363.963	193.223	121.213	121.213	10.658	800.657	1836.64	5.44708	0.0039507
BN	1999-04-29	145.2	852300	145500	1075	0.545	569	31.4	430	1.42	0.5	0.145821	-2.16677	9.52256	216.485	22.0724	355.97	356.784	355.97	175.115	99.766	175.115	10.6116	806.779	1846.36	5.44815	0.00383048
BN	1999-06-03	147	860600	137200	1075	0.484	552	30.2	412	1.28	0.496	0.137503	-2.12197	9.62227	221.495	24.029	340.003	331.58	340.003	143.515	64.5678	143.515	10.7268	793.563	1779.55	5.44583	0.00385108
BN	1999-08-03	145.5	852400	145300	1125	0.55	542.6	26.7	414	1.27	0.585631	0.145635	-2.081	9.51882	226.098	26.4162	356.666	357.76	356.666	176.49	101.451	176.49	10.7446	790.799	1786.08	5.44533	0.00403476
BN	1999-09-16	150.9	852700	145200	1081	0.45	509	24.7	404.4	1.21	0.534961	0.145506	-2.10966	9.52667	222.861	24.8793	355.275	355.809	355.275	173.649	98.0432	173.649	10.7879	785.709	1766.6	5.44442	0.00388509
BN	1999-10-19	147.3	850700	147200	1045	0.44	522.3	24.8	456.1	1.37	0.540379	0.14751	-2.16449	9.30941	216.735	22.2217	400.27	404.03	404.03	293.948	252.657	252.657	10.592	809.05	1858.49	5.44855	0.00372019
BN	1999-11-25	149.8	847800	149700	1220	0.573	578	24.8	468	1.33	0.46936	0.150075	-2.24567	9.25142	207.86	18.7619	414.277	414.166	414.166	325.713	292.93	292.93	10.6092	806.744	1855.47	5.44815	0.00434721
BN	2000-01-03	149.4	854700	143100	1102	0.719	528	20.1	423	1.34	0.427186	0.143416	-2.21955	9.36945	210.691	19.6811	387.211	392.975	392.975	261.52	211.02	211.02	10.806	783.762	1754.93	5.44408	0.00396375
BN	2000-03-24	148.5	846800	151300	969.97	0.53619	471.297	16.5596	352.473	1.23259	0.472239	0.151588	-2.12502	9.56183	221.123	24.2581	348.545	345.868	348.545	161.643	83.1552	161.643	11.0303	757.639	1671.17	5.43931	0.00352732
BN	2000-04-11	149.1	849900	148200	932.447	0.49366	476.751	16.8268	340.919	1.2157	0.487659	0.148482	-2.08601	9.64202	225.521	26.2253	336.034	324.818	336.034	138.469	58.1509	138.469	11.0725	753.24	1647.98	5.4385	0.00339725
BN	2000-05-17	149.1	853600	144700	900.304	0.530702	432.045	15.1902	311.411	1.11795	0.403275	0.144946	-2.11695	9.77278	222.043	24.4872	317.88	286.696	317.88	109.495	31.572	109.495	11.2359	735.968	1573.77	5.43524	0.00330484
BN	2000-06-15	148	873000	125000	1100.19	0.470312	466.423	16.68	330.556	1.25006	0.434351	0.125251	-2.0373	9.81236	231.156	28.2838	313.483	274.181	313.483	100.997	26.1427	100.997	11.3121	729.703	1514.22	5.43403	0.0040498
BN	2000-07-06	144.8	846400	151600	1010.42	0.429781	483.963	17.2426	341.226	1.28158	0.438211	0.151904	-2.14448	9.63403	218.949	23.2955	337.008	326.771	337.008	140.704	60.1211	140.704	11.082	751.922	1649.48	5.43825	0.00368341
BN	2000-08-01	146.2	869000	129300	876.353	0.452561	390.694	15.8207	319.553	1.13807	0.428448	0.12952	-2.04522	9.82553	230.23	27.9523	311.674	269.597	311.674	99.0743	24.4794	99.0743	11.255	735.284	1543.24	5.43511	0.00321789
BN	2000-08-22	146.6	837900	160200	1062.72	0.672806	511.277	18.2857	273.866	1.43573	0.472792	0.160505	-2.04434	10.0001	230.218	28.9778	291.804	219.761	291.804	78.0265	10.5624	78.0265	11.353	722.398	1548.35	5.43261	0.00392472
BN	2000-08-23	145.9	868200	130100	896.206	0.55292	444.196	17.2585	255.662	1.18515	0.423031	0.130322	-1.95695	10.2465	240.442	33.5182	269.582	125.052	269.582	54.0675	2.93988	54.0675	11.5466	705.466	1428.07	5.42922	0.0033357
BN	2000-08-26	144.7	841200	156800	1043.27	0.424097	445.399	16.075	325.956	1.2284	0.501429	0.157114	-2.0834	9.65777	225.792	26.6262	333.145	320.108	333.145	134.97	53.7581	134.97	11.1571	743.348	1625.82	5.43664	0.00381729
BN	2000-09-13	146.2	845500	152500	1036.31	0.701772	478.275	17.5705	325.985	1.23655	0.489617	0.152806	-2.0795	9.71718	226.246	26.7125	324.964	303.499	324.964	121.119	40.9593	121.119	11.1486	744.621	1622.57	5.43688	0.00378972
BN	2000-09-13	145.8	847900	150200	1006.75	0.582367	451.276	16.0139	312.117	1.17961	0.548905	0.150486	-2.00315	9.76394	234.984	31.1835	318.824	289.698	318.824	111.578	32.8966	111.578	11.238	735.277	1581.3	5.43511	0.0036967
BN	2000-09-13	146.5	843200	154900	1033.74	0.568458	482.483	17.5405	331.6	1.25698	0.511944	0.155195	-2.07551	9.67525	226.691	27.007	330.72	315.344	330.72	130.646	49.6793	130.646	11.1121	748.377	1641.97	5.43759	0.00377418
BN	2000-09-13	146.8	844000	154100	1025.65	0.758952	462.574	16.688	304.906	1.15504	0.462057	0.154393	-2.08093	9.80331	226.079	26.6808	313.713	278.346	313.713	104.798	27.2852	104.798	11.2479	733.902	1583.14	5.43484	0.0037684
BN	2000-09-13	145.9	847900	150200	996.678	0.709618	463.198	16.7053	326.283	1.23397	0.518704	0.150486	-2.047	9.70518	229.951	28.4979	326.733	306.909	326.733	123.542	43.36	123.542	11.1571	743.896	1615.29	5.43674	0.00364595
BN	2000-09-13	144.6	855600	142700	939.9	0.468897	401.753	15.0026	237.023	1.08153	0.468916	0.142943	-1.92585	10.2517	244.01	36.1668	269.285	129.499	269.285	54.6118	2.9276	54.6118	11.6564	693.432	1400.56	5.42672	0.00351855
BN	2000-09-13	146.2	851800	146400	964.103	0.643635	440.18	15.8091	297.612	1.1452	0.497524	0.146664	-2.01204	9.86012	233.975	30.493	307.074	259.658	307.074	94.9888	20.7312	94.9888	11.3105	727.991	1545.44	5.4337	0.00355158
BN	2000-09-13	145.3	861700	136500	920.509	0.517713	398.216	14.3886	280.39	1.0595	0.456994	0.136746	-1.98763	9.97326	236.841	31.7095	294.676	220.617	294.676	79.0511	11.8046	79.0511	11.4548	714.066	1472.86	5.43096	0.00341246
BN	2000-10-25	146.8	842400	155700	1009.09	0.587722	447.053	17.6141	330.232	1.26294	0.44	0.155996	-2.14214	9.68037	219.203	23.5208	329.947	313.927	329.947	129.505	48.5044	129.505	11.1024	749.369	1647.43	5.43777	0.00368262
BN	2000-10-25	146.6	846900	151200	986.124	0.427975	442.279	17.4992	328.658	1.2401	0.423237	0.151488	-2.14188	9.70782	219.24	23.4121	326.316	306.159	326.316	123.035	42.8098	123.035	11.1232	747.474	1631.25	5.43742	0.00360175
BN	2000-10-25	146.7	848900	149200	957.019	0.367838	433.139	17.4498	321.83	1.23446	0.417702	0.149484	-2.13167	9.75294	220.383	23.8649	320.301	292.909	320.301	113.61	34.6602	113.61	11.151	744.641	1616.31	5.43689	0.00349974
BN	2000-10-25	146.6	851100	147100	943.884	0.383184	418.169	16.8377	312.74	1.20137	0.44	0.147365	-2.08936	9.79786	225.146	26.0105	314.597	279.174	314.597	105.161	27.9945	105.161	11.2076	738.762	1589.24	5.43577	0.00346057
BN	2000-10-25	146.1	847200	150800	1013.66	0.498802	452.826	17.8822	332.364	1.21236	0.44	0.151102	-2.12858	9.69951	220.726	24.0647	327.495	308.537	327.495	124.834	44.5073	124.834	11.1142	748.476	1634.44	5.43761	0.00370073
BN	2000-10-25	146.3	851100	147000	998.875	0.425518	445.008	17.8521	342.361	1.29705	0.44	0.14728	-2.12837	9.66636	220.757	23.9709	332.479	318.078	332.479	132.311	52.0413	132.311	11.085	751.979	1640.76	5.43826	0.00364124
BN	2000-10-25	145.7	855800	142400	944.913	0.336056	407.421	16.5067	318.798	1.1798	0.44	0.142657	-2.0812	9.77958	226.084	26.3176	317.083	284.501	317.083	108.067	30.5732	108.067	11.2102	738.879	1580.97	5.43579	0.00346416
BN	2000-10-25	146.1	848700	149400	964.92	0.460613	439.274	17.6246	335.633	1.23869	0.479633	0.149684	-2.09055	9.68333	225.005	26.0137	329.867	313.167	329.867	128.415	48.0208	128.415	11.0904	751.191	1642.32	5.43811	0.00351866
BN	2000-10-25	146.2	852500	145700	953.898	0.410833	410.971	16.4424	319.365	1.21856	0.46759	0.145963	-2.06719	9.75813	227.665	27.1949	319.756	291.194	319.756	112.343	33.8477	112.343	11.1963	740.084	1591.81	5.43602	0.00349526
BN	2000-10-25	146.5	849300	148800	985.46	0.432702	442.206	17.6245	335.33	1.26165	0.44	0.149083	-2.12556	9.68787	221.068	24.1619	329.25	311.886	329.25	127.332	47.0367	127.332	11.1038	749.778	1635.65	5.43785	0.00359575
BN	2000-10-25	146.5	851100	147100	944.43	0.427079	428.658	16.8896	330.35	1.22378	0.44	0.147365	-2.11315	9.70403	222.463	24.7499	327.054	307.258	327.054	123.593	43.667	123.593	11.1282	747.269	1622.57	5.43738	0.00344977
BN	2000-10-25	146.3	850000	148100	954.219	0.415458	443.526	17.7726	341.948	1.24755	0.44	0.148382	-2.13164	9.66103	220.389	23.8365	333.194	319.52	333.194	133.668	53.2884	133.668	11.0627	754.328	1652.02	5.4387	0.00347496
BN	2000-10-25	146.5	845400	152700	987.665	0.53102	453.316	18.0073	338.206	1.2742	0.44	0.152991	-2.14251	9.66313	219.167	23.4216	332.601	318.739	332.601	133.406	52.5931	133.406	11.0668	753.504	1657.79	5.43855	0.00359803
BN	2000-10-25	146.8	842500	155600	982.116	0.56557	475.362	18.7211	349.494	1.31805	0.44	0.155896	-2.16643	9.60884	216.509	22.346	340.602	333.219	340.602	147.713	67.1252	147.713	10.9913	761.625	1695.27	5.44005	0.00356544
BN	2000-11-20	147.3	846200	151900	962.914	0.410203	461.49	17.2571	322.934	1.24707	0.454937	0.152189	-2.10525	9.72884	223.341	25.3	323.405	300.111	323.405	118.637	38.7936	118.637	11.1388	745.726	1625.74	5.43709	0.00351964
BN	2000-11-24	145.8	847600	150400	934.766	0.319968	587.525	18.9444	350.373	1.33286	0.477285	0.150701	-2.11481	9.63488	222.269	24.7576	336.964	326.623	336.964	140.428	59.9562	140.428	10.9878	762.427	1688.01	5.4402	0.00339239
BN	2000-11-24	145.7	848500	149700	952.392	0.422004	438.677	16.5176	317.204	1.19699	0.451363	0.14997	-2.09338	9.75198	224.684	25.8691	320.409	293.222	320.409	113.835	34.815	113.835	11.184	741.051	1603.12	5.43621	0.00348826
BN	2000-12-21	147.8	860200	138100	884.927	0.367533	416.82	15.3129	312.866	1.20525	0.431987	0.138335	-2.06548	9.80183	227.884	27.062	314.385	277.357	314.385	103.766	27.4766	103.766	11.253	734.73	1556.87	5.435	0.00325017
BN	2001-01-15	147	873100	125200	890.43	0.414593	401.192	13.9539	309.806	1.17235	0.347885	0.125413	-2.10619	9.84699	223.3	24.5071	309.122	262.548	309.122	95.2865	22.0005	95.2865	11.364	724.338	1493.75	5.43299	0.00328556
BN	2001-01-17	146.1	837700	160300	992.8	0.473182	465.392	15.7336	365.774	1.32794	n.a.	0.160621	#VALUE!	9.4314			371.1	375.259	375.259	221.229	155.656	155.656	10.9555	765.261	1719.06	5.44072	0.00359869
BN	2001-01-25	147.2	841300	156800	975.894	0.421872	436.722	14.5032	358.104	1.3139	0.432535	0.157098	-2.18838	9.44989	214.089	21.3634	367.986	371.874	371.874	212.299	144.679	144.679	11.0169	758.677	1686.16	5.43951	0.0035473
BN	2001-03-01	146.3	862400	136000	837	0.4186	386.7	12.23	293.309	1.1104	0.413	0.136218	-2.04921	9.82742	229.75	27.9256	311.246	269.054	311.246	99.2735	24.2562	99.2735	11.3947	720.229	1496.28	5.43218	0.00309415
BN	2001-03-07	146	839900	158400	915	0.308	409.7	12.73	314.569	1.1865	0.435	0.15867	-2.13475	9.61112	220.02	23.9616	340.055	332.437	340.055	147.217	66.2905	147.217	11.207	737.883	1607.09	5.4356	0.00335596
BN	2001-05-02	145.3	843000	155100	1011.73	0.387136	449.191	15.0771	350.202	1.33113	0.566771	0.155395	-2.05569	9.51374	228.942	28.1447	356.423	357.268	356.423	178.03	102.02	178.03	11.0644	753.574	1662.78	5.43856	0.00368557
BN	2001-05-11	145	837600	160500	986.227	0.394519	463.012	15.6304	341.633	1.32411	0.588271	0.160806	-2.04642	9.54641	229.98	28.8635	350.289	348.571	350.289	166.817	88.0012	166.817	11.0544	754.24	1676.13	5.43868	0.00359165
BN	2001-05-22	144.9	838900	159200	997.719	0.444618	447.665	15.4469	333.125	1.30822	0.477663	0.159503	-2.12172	9.59131	221.475	24.6484	343.092	337.482	343.092	152.881	72.3541	152.881	11.1058	748.712	1651.71	5.43765	0.00364215
BN	2001-05-31	149.9	839200	158900	994.128	0.500179	471.575	16.3979	343.775	1.31942	0.646777	0.159202	-2.00278	9.56403	234.988	31.5092	347.507	344.396	347.507	161.112	81.6237	161.112	11.0432	755.596	1678.27	5.43893	0.00361833
BN	2001-07-19	144.1	835100	163000	970.316	0.465363	461.779	17.5552	355.274	1.35616	0.728243	0.16331	-1.97874	9.51692	237.745	33.2399	355.08	355.337	355.08	176.944	99.6488	176.944	10.946	766.127	1727.98	5.44088	0.0035159
BN	2001-08-11	146.5	839700	158400	991.122	0.438556	459.851	17.6936	350.003	1.3339	0.463444	0.158702	-2.15371	9.56827	217.913	23.0274	346.854	343.386	346.854	159.772	80.1588	159.772	10.9965	760.816	1697.76	5.4399	0.00359937
BN	2001-09-28	145.3	838500	159500	986.843	0.391737	460.099	19.412	351.128	1.33657	0.484928	0.15982	-2.13905	9.59746	219.54	23.7783	342.101	335.886	342.101	151.121	70.3875	151.121	10.9564	765.221	1717.26	5.44071	0.00357716
BN	2001-10-25	145.6	843000	155200	923.398	0.372722	427.848	18.5598	321.209	1.13968	0.447666	0.15548	-2.1209	9.75384	221.576	24.5774	319.956	293.062	319.956	113.905	34.4767	113.905	11.0893	750.833	1652.19	5.43805	0.00336776
BN	2001-11-29	146.8	847000	151200	925.373	0.584193	428.873	18.9779	318.15	1.18709	0.422022	0.151473	-2.12896	9.79971	220.682	24.0553	314.243	279.05	314.243	105.175	27.7516	105.175	11.1159	748.265	1634.33	5.43757	0.00337871
BN	2001-12-13	148	834300	163800	1007	0.535053	433.92	18.9279	332.251	1.25116	0.454076	0.164112	-2.15733	9.66221	217.502	22.9965	332.126	318.902	332.126	134.383	52.5032	134.383	11.0314	756.513	1691.76	5.4391	0.00366373
BN	2002-01-08	148	840000	158100	1049.09	0.548051	439.979	19.8012	338.583	1.25163	0.481977	0.158401	-2.12129	9.67622	221.525	24.6394	330.413	315.08	330.413	130.639	49.3798	130.639	11.035	756.563	1680.48	5.43911	0.00381681
BN	2002-02-04	148.9	829700	168200	1100.72	0.481813	460.738	19.5773	374.716	1.3085	0.533268	0.168554	-2.15366	9.4468	217.9	23.2949	367.194	370.386	370.386	211.723	142.182	142.182	10.8669	774.734	1772.73	5.44245	0.00397401
BN	2002-02-27	147.7	841400	156700	1018.57	0.415471	419.156	16.3445	345.614	1.19987	0.552616	0.156998	-2.06623	9.56395	227.738	27.5875	347.705	344.657	347.705	161.07	81.8427	161.07	11.0575	754.2	1668.41	5.43867	0.0037095
BN	2002-03-14	145.7	838700	159300	1036.59	0.455574	430.323	17.4166	356.966	1.22681	0.484735	0.159619	-2.14573	9.52266	218.796	23.4415	354.433	354.476	354.433	174.85	97.6343	174.85	10.9875	761.754	1703.29	5.44007	0.00376299
BN	2002-04-18	145.8	828600	169200	1218.48	0.728896	455.782	16.4366	409.356	1.35083	0.829876	0.169573	-2.00314	9.21239	234.902	31.8538	419.285	415.183	415.183	336.655	303.967	303.967	10.8235	779.673	1794.25	5.44334	0.00439016
BN	2002-04-23	146.6	838600	159300	1107.81	0.772602	435.453	15.3709	385.345	1.26645	0.555532	0.159635	-2.1198	9.3353	221.689	24.7512	391.421	395.505	395.505	273.584	224.28	224.28	10.9358	767.566	1726.04	5.44114	0.00401166
BN	2002-05-09	145.7	843900	154100	1050.9	0.802116	424.839	14.6133	378.241	1.2646	0.606904	0.154409	-2.05616	9.37104	228.892	28.0866	384.515	389.617	389.617	255.864	201.89	201.89	10.9781	763.217	1698.49	5.44034	0.00381256
BN	2002-05-22	145	826900	171000	1174.69	0.572071	458.036	16.0097	424.001	1.3602	0.62592	0.17136	-2.14639	9.13173	218.701	23.7308	441.47	427.591	427.591	379.508	356.685	356.685	10.7528	787.832	1829.99	5.4448	0.00421811
BN	2002-05-22	146.2	826600	171300	1162.05	0.571752	460.105	16.0516	420.344	1.42747	0.627004	0.17166	-2.1428	9.14652	219.099	23.9187	437.021	425.226	425.226	371.346	346.729	346.729	10.7592	787.056	1827.63	5.44467	0.00417405
BN	2002-05-22	146.1	806700	191000	1280.73	0.537229	469.984	16.8668	437.122	1.38984	0.698718	0.19144	-2.17062	9.01044	215.991	23.0988	474.668	439.25	439.25	432.779	417.359	417.359	10.6414	799.711	1922.64	5.44691	0.0045766
BN	2002-05-22	145.2	837500	160500	1092.53	0.392505	400.371	14.2766	370.402	1.22643	0.587331	0.160822	-2.08228	9.3664	225.908	26.8005	384.376	388.96	388.96	256.06	201.126	201.126	11.001	760.147	1699.42	5.43978	0.00396878
BN	2002-05-22	145.1	825700	172100	1163.31	0.569164	460.142	15.9681	421.039	1.42285	0.630052	0.172479	-2.1439	9.13747	218.975	23.8862	439.446	426.386	426.386	375.772	352.015	352.015	10.7544	787.553	1831.38	5.44476	0.00417774
BN	2002-05-22	146.4	827400	170500	1146.92	0.476055	441.611	15.7737	405.991	1.37186	0.624173	0.170859	-2.12722	9.20301	220.835	24.6884	421.473	416.386	416.386	341.109	309.386	309.386	10.8136	780.738	1801.2	5.44353	0.00413049
BN	2002-05-22	146	840000	158000	1078.92	0.459665	426.917	14.8371	390.193	1.31305	0.5784	0.158317	-2.10343	9.30469	223.53	25.5736	398.759	401.809	401.809	291.178	247.421	247.421	10.9203	769.43	1730.58	5.44148	0.00390398
BN	2002-06-20	147.7	829500	168500	1068.36	0.673805	451.419	15.4765	397.287	1.42644	0.548879	0.168838	-2.16741	9.24192	216.38	22.6385	411.823	410.336	410.336	320.875	284.056	284.056	10.8293	779.06	1790.27	5.44323	0.00385025
BN	2002-07-15	146.3	832100	165900	1072.61	0.444374	446.177	14.7127	388.648	1.42747	0.642434	0.166232	-2.0814	9.27032	225.991	27.0158	405.327	406.014	406.014	306.537	266.063	266.063	10.888	772.489	1759.01	5.44204	0.00387617
BN	2002-09-24	147.7	836100	161900	1067.9	0.414554	455.605	15.5103	366.082	1.54803	0.539868	0.162224	-2.11828	9.4161	221.853	24.9041	373.901	378.238	378.238	228.921	165.391	165.391	10.9819	762.169	1710.21	5.44015	0.00387597
BN	2002-10-24	147.9	836000	162000	1023.16	0.424751	462.868	16.838	380.629	1.66901	0.539382	0.162325	-2.13591	9.38359	219.884	24.0043	380.503	385.068	385.068	246.251	188.021	188.021	10.8841	773.242	1753.73	5.44217	0.00369633
BN	2002-11-19	147.7	829900	168300	942.818	0.479277	414.012	15.1235	327.733	1.41884	0.528871	0.168603	-2.09923	9.56759	223.975	26.1044	346.22	342.687	346.22	160.459	79.7358	160.459	11.068	752.121	1683.41	5.43829	0.00343669
BN	2003-01-16	148.1	837600	160400	1012.28	0.637316	481.239	18.4945	402.473	1.73602	0.447934	0.160721	-2.23569	9.33504	208.935	19.4069	391.275	395.273	395.273	273.29	223.722	223.722	10.78	785.435	1797.57	5.44438	0.00363852
BN	2003-01-16	148	846600	151600	777.166	0.413996	467.318	18.3616	393.336	1.71758	0.449909	0.151873	-2.19466	9.41487	213.405	20.9537	375.723	380.857	380.857	232.576	171.781	171.781	10.7439	790.382	1797.64	5.44526	0.00278775
BN	2003-02-25	148.4	833200	164700	1026.02	0.5713	520.328	19.9589	398.814	1.73678	0.511728	0.165047	-2.18768	9.36336	214.157	21.5953	384.344	388.561	388.561	256.285	200.739	200.739	10.7573	787.787	1815.98	5.4448	0.00368432
BN	2003-03-19	146	833800	164200	1005.75	0.468941	431.369	18.2277	351.336	1.41947	0.529855	0.164529	-2.11588	9.54672	222.117	25.0959	349.928	348.084	349.928	166.85	87.5672	166.85	10.9608	764.365	1723.57	5.44055	0.00364702
BN	2003-04-14	147.7	831300	166700	1043.28	0.404041	471.558	17.9016	362.575	1.54129	0.530545	0.167034	-2.13685	9.4724	219.769	24.0882	362.619	365.008	365.008	199.051	126.329	126.329	10.9247	768.247	1744.05	5.44126	0.0037769
BN	2003-06-11	147.5	832200	165800	1036.08	0.570326	470.544	15.8114	378.134	1.60864	0.619096	0.166132	-2.08524	9.34972	225.557	26.7981	387.104	391.023	391.023	263.28	209.737	209.737	10.8974	771.429	1754.64	5.44184	0.00374582
BN	2003-06-24	147	815900	182200	970.93	0.740816	468.149	15.1811	382.779	1.38197	0.601966	0.182547	-2.15229	9.23551	218.027	23.7505	410.808	407.813	407.813	318.267	278.591	278.591	10.7855	783.144	1836.49	5.44396	0.0034932
BN	2003-08-06	147.7	819800	178100	1125.44	0.653191	480.987	15.532	403.44	1.63654	0.748278	0.178475	-2.06867	9.17228	227.392	28.1307	428.054	419.253	419.253	353.859	324.245	324.245	10.7835	783.686	1829.53	5.44406	0.00404819
BN	2003-09-26	142.7	825100	172900	1074.88	0.469545	450.288	13.1617	391.179	1.59641	0.632476	0.173246	-2.11262	9.17804	222.46	25.5233	427.678	419.789	419.789	353.423	324.437	324.437	10.8707	773.945	1779.68	5.4423	0.00388204
BN	2003-10-10	147.5	833400	164500	1060.44	0.494869	470.665	13.3998	399.719	1.61995	0.5298	0.164846	-2.17296	9.18733	215.775	22.2713	427.288	420.713	420.713	352.955	325.005	325.005	10.867	775.006	1765.92	5.4425	0.00382818
BN	2003-11-11	148.4	833300	164600	1030.59	0.431503	475.013	13.3719	413.022	1.75815	0.551107	0.164946	-2.17037	9.12908	216.061	22.3958	444.278	429.903	429.903	384.763	363.787	363.787	10.8043	782.266	1794.38	5.44381	0.00370918
BN	2003-11-28	146.5	827400	170600	1021.6	0.480661	479.944	13.7955	414.796	1.76343	0.592573	0.170942	-2.15936	9.10728	217.266	23.0822	449.053	431.393	431.393	392.915	372.838	372.838	10.7598	787.042	1825.99	5.44466	0.00366958
BN	2004-01-16	145	832200	165900	862.92	0.527375	467.445	13.9541	387.273	1.75036	0.545805	0.166216	-2.1506	9.2537	218.244	23.3813	409.433	408.994	408.994	315.684	277.816	277.816	10.811	781.393	1793.72	5.44365	0.00310685
BN	2004-02-06	147.2	821700	176500	847.163	0.44056	460.619	13.7495	386.198	1.68329	0.512557	0.176818	-2.2091	9.20316	211.806	20.9295	420.12	414.712	414.712	338.077	304.698	304.698	10.7615	786.4	1836.51	5.44455	0.00304382
BN	2004-03-23	148	825900	172000	999.44	0.472852	511.09	15.117	396.896	1.78711	0.515438	0.172362	-2.2051	9.21694	212.245	20.9953	417.464	413.638	413.638	332.777	298.66	298.66	10.7908	783.285	1814.44	5.44399	0.00359556
BN	2004-03-29	148	822200	175800	1003.59	0.453486	512.833	15.7923	400.574	1.75563	0.544805	0.176152	-2.19648	9.20261	213.181	21.4778	420.404	414.984	414.984	338.691	305.572	305.572	10.7512	787.658	1839.95	5.44477	0.00360398
BN	2004-04-28	147.7	821800	176300	865.672	0.638926	542.485	16.7917	422.861	2.02466	0.547415	0.176636	-2.21937	9.13312	210.691	20.4753	439.612	425.862	425.862	375.821	351.544	351.544	10.5892	807.178	1917	5.44822	0.0030841
BN	2004-05-31	147.6	816500	181300	1033.66	0.672673	572.121	18.1268	442.711	1.95882	0.606909	0.1817	-2.20944	9.06327	211.764	21.0373	459.787	434.664	434.664	410.205	392.098	392.098	10.5557	810.939	1943.47	5.44888	0.00367705
BN	2004-06-18	147.4	821700	176100	1015.05	0.487845	569.255	18.1376	446.754	2.06407	0.559645	0.176488	-2.2332	9.0714	209.196	19.8804	458.721	434.99	434.99	408.821	391.041	391.041	10.5578	811.067	1931.66	5.4489	0.00361066
BN	2004-07-30	147.7	816900	181100	982.048	1.00661	557.164	16.4936	416.841	1.85538	0.691026	0.181463	-2.12623	9.12819	220.921	25.0489	439.849	425.259	425.259	375.908	351.021	351.021	10.6477	799.677	1899.07	5.44691	0.00350933
BN	2004-09-17	147.3	818800	179100	1015.92	1.07986	527.844	16.7385	424.084	1.91099	0.626539	0.179477	-2.17042	9.11353	216.032	22.7801	444.693	428.011	428.011	384.762	362.026	362.026	10.6419	800.521	1897.76	5.44706	0.00362913
BN	2004-10-21	147.6	809800	188000	1049.75	1.02248	563.951	18.3943	452.879	1.96039	0.656693	0.188415	-2.2044	9.00011	212.304	21.4353	479.205	441.43	441.43	439.695	425.592	425.592	10.4949	818.057	1987.31	5.45011	0.0037237
BN	2004-11-25	147.2	821000	176900	1012.79	0.99034	538.656	17.8195	433.197	1.84702	0.554231	0.177272	-2.22638	9.1138	209.932	20.189	445.198	428.592	428.592	385.811	363.567	363.567	10.6037	805.348	1911.4	5.4479	0.00361089
BN	2004-12-23	147.1	829800	168300	982.167	0.420539	426.423	14.8016	370.213	1.67423	0.541514	0.16862	-2.14195	9.34631	219.199	23.8762	387.452	391.1	391.1	264.277	210.639	210.639	10.9104	769.754	1753.3	5.44154	0.00355341
BN	2005-01-11	148.2	831700	166400	941.273	0.969341	491.08	16.4437	393.049	1.78462	0.541348	0.166717	-2.16216	9.29693	216.964	22.8334	398.882	401.005	401.005	291.745	246.839	246.839	10.7857	784.306	1806.12	5.44417	0.00338487
BN	2005-02-09	148	824700	173300	978.417	0.54782	508.155	18.011	421.435	1.82461	0.596991	0.173647	-2.17127	9.183	215.948	22.5831	426.221	418.877	418.877	350.531	320.781	320.781	10.6437	800.734	1885.2	5.44709	0.00349486
BN	2005-03-22	142.3	826300	171600	1007.42	0.477875	480.243	17.0518	428.765	1.83358	0.569081	0.171961	-2.19442	9.13693	213.41	21.4641	439.753	426.62	426.62	376.36	352.794	352.794	10.6518	799.879	1878.06	5.44694	0.00359969
BN	2005-04-28	139.9	825900	172100	995.362	0.521174	493.04	17.9833	443.506	1.75933	0.578468	0.172445	-2.20347	9.0992	212.422	21.0697	451.108	432.145	432.145	396.363	376.769	376.769	10.5811	808.486	1912.32	5.44845	0.00354428
BN	2005-05-09	147	823700	174200	1041.95	0.511905	499.287	17.0536	452.76	1.84694	0.58486	0.174567	-2.2141	9.03037	211.265	20.6538	473.238	441.244	441.244	431.597	417.627	417.627	10.5725	809.388	1920.71	5.44861	0.00370881
BN	2005-05-09	147	824800	173100	1035.16	0.375779	489.095	17.0403	439.043	1.72177	0.581306	0.173464	-2.20005	9.08855	212.794	21.2485	454.158	433.402	433.402	401.458	382.696	382.696	10.6213	803.481	1895.4	5.44758	0.00369342
BN	2005-06-13	145.4	818300	179700	994.572	0.432724	493.919	16.5327	461.7	1.81458	0.72124	0.18006	-2.14792	8.95801	218.515	23.8985	497.923	449.14	449.14	465.99	455.771	455.771	10.5046	817.433	1964.65	5.45	0.00352885
BN	2005-07-13	148.5	820100	177800	1069.59	0.561786	463.675	14.9786	435.244	1.76746	0.60089	0.178174	-2.196	9.02608	213.231	21.5515	473.443	440.792	440.792	431.74	417.457	417.457	10.6557	798.947	1888.63	5.44678	0.00382328
BN	2005-08-02	147.1	820500	177400	1035.99	0.784407	503.444	15.7719	461.322	1.79675	0.691602	0.177773	-2.15902	8.94923	217.291	23.2851	502.386	450.87	450.87	471.78	462.273	462.273	10.5439	812.692	1940.95	5.44918	0.00368275
BN	2005-09-22	145	821000	177000	1070.73	0.531226	476.261	14.7114	422.172	1.74527	0.666579	0.177355	-2.13527	9.0751	219.924	24.4616	457.257	434.215	434.215	406.368	388.06	388.06	10.7103	792.432	1861.34	5.44563	0.00383757
BN	2005-10-10	135.2	834600	163400	962.25	0.443647	473.887	14.9772	420.182	1.7238	0.567334	0.163727	-2.16137	9.15434	217.055	22.7915	437.08	426.352	426.352	371.722	348.189	348.189	10.7306	791.051	1825.69	5.44538	0.00345071
BN	2005-12-01	142.2	823300	174600	1049.12	0.532499	464.633	13.845	437.28	1.80629	0.687297	0.174967	-2.1301	8.99844	220.504	24.6581	484.598	445.384	445.384	448.032	436.2	436.2	10.6707	797.365	1875.15	5.4465	0.00375255
BN	2006-01-09	145	825000	173000	1010.63	0.380551	440.913	13.2704	418.066	1.74822	0.626499	0.173347	-2.14592	9.06567	218.75	23.8098	461.632	436.711	436.711	413.695	397.078	397.078	10.7396	789.242	1839.89	5.44506	0.00362689
BN	2006-03-08	144.6	817400	180500	1035.74	0.580001	488.628	14.0447	449.902	1.87337	0.729445	0.18088	-2.13417	8.9283	220.039	24.6199	509.517	452.596	452.596	480.737	471.82	471.82	10.5915	806.574	1924.59	5.44812	0.00369088
BN	2006-04-24	145.5	810600	187300	1096.61	1.28767	521.058	13.6155	447.216	1.96409	0.744441	0.187694	-2.14242	8.89465	219.109	24.3952	520.692	454.848	454.848	494.311	486.047	486.047	10.601	804.922	1934.26	5.44783	0.00391042
BN	2006-04-24	145.5	813500	184500	1079.81	0.852824	484.753	13.444	422.293	1.84301	0.733204	0.18487	-2.11603	9.00151	222.05	25.6902	479.851	442.208	442.208	440.839	427.224	427.224	10.698	793.353	1882.13	5.44579	0.00386864
BN	2006-05-22	146.1	804900	193200	923.341	0.57205	486.783	13.4438	460.263	1.88611	0.694644	0.193568	-2.20151	8.81346	212.613	21.7016	555.321	462.742	462.742	532.625	525.983	525.983	10.4583	822.319	2016.66	5.45084	0.00326981
BN	2006-06-21	145	818600	179500	1010.71	0.858751	486.361	13.9148	436.252	1.87943	0.709988	0.179842	-2.12948	8.98275	220.563	24.8318	488.522	446.047	446.047	453.351	441.765	441.765	10.6352	801.309	1901.68	5.4472	0.00360935
BN	2006-07-21	145.2	812100	185900	1053.32	0.69635	493.03	14.2538	455.439	1.95754	0.710428	0.186273	-2.16658	8.88937	216.444	23.1515	523.611	455.843	455.843	497.697	489.734	489.734	10.553	810.943	1954.41	5.44888	0.00374697
BN	2006-09-06	144.6	810600	187400	1026.21	0.670213	499.506	14.1828	461.738	1.98318	0.700244	0.187776	-2.18311	8.85664	214.628	22.4014	537.595	459.274	459.274	513.491	506.337	506.337	10.5147	815.611	1976.23	5.44969	0.00364374
BN	2006-09-27	143	805200	192700	1128.19	0.789812	485.664	13.8572	456.734	1.90029	0.69142	0.193106	-2.1989	8.84176	212.897	21.809	541.958	459.655	459.655	518.565	511.439	511.439	10.5534	810.405	1968.84	5.44879	0.00401417
BN	2006-10-23	145.2	808100	189800	1131.81	0.777401	497.37	14.0337	453.827	1.93816	0.613421	0.190199	-2.23996	8.87118	208.46	19.9262	529.861	456.976	456.976	505.007	497.307	497.307	10.5751	807.925	1952.04	5.44836	0.00403106
BN	2006-10-27	144.7	812200	185700	1090.7	0.522884	486.81	14.4002	440.421	1.88693	0.672275	0.186091	-2.17547	8.95274	215.467	22.7182	497.601	448.162	448.162	465.431	454.72	454.72	10.6185	802.894	1922.5	5.44747	0.00389253
BN	2006-11-13	144.7	831100	166900	1037.12	0.85109	515.461	14.2247	459.768	2.03041	0.606027	0.167234	-2.18285	8.95904	214.684	21.8726	503.604	452.641	452.641	473.044	464.288	464.288	10.619	804.219	1884.04	5.44771	0.00369931
BN	2006-12-14	142.5	812800	185000	1204.47	0.732915	510.522	14.3218	444.891	1.81753	0.600301	0.185408	-2.22707	8.93575	209.851	20.3583	504.575	450.464	450.464	474.514	464.761	464.761	10.65	799.1	1906	5.44681	0.00430515
BN	2007-01-18	144	808400	189600	1003.29	0.736729	490.459	13.2843	471.411	1.93999	0.654926	0.18998	-2.22742	8.78241	209.81	20.4568	573.178	467.007	467.007	549.603	543.287	543.287	10.4749	820.469	2000.54	5.45052	0.00355553
BN	2007-02-16	141.8	807300	190800	959.708	0.883233	485.414	11.4372	448.176	1.76531	0.632667	0.191163	-2.22382	8.80009	210.198	20.643	563.301	464.798	464.798	540.32	533.897	533.897	10.555	810.346	1963.88	5.44878	0.00341478
BN	2007-03-12	143.7	803600	194200	1157.08	1.23674	536.066	10.997	489.733	2.03583	0.713963	0.194628	-2.21949	8.61335	210.662	20.9207	676.851	483.244	483.244	631.188	621.653	621.653	10.4859	818.738	2005.31	5.45023	0.00410335
BN	2007-04-18	142.6	802500	195300	1130.05	1.30468	545.366	8.46462	510.922	2.13392	0.702124	0.195731	-2.2482	8.42127	207.574	19.7151	861.817	500.767	500.767	724.795	703.401	703.401	10.4352	825.097	2032.95	5.45131	0.00399746
BN	2007-05-08	143.7	787400	210500	1102.86	0.909107	505.848	7.19012	489.414	2.10568	0.815394	0.210943	-2.20537	8.35956	212.172	21.9907	914.589	503.962	503.962	756.94	731.912	731.912	10.4461	822.658	2062.42	5.4509	0.00390502
BN	2007-06-07	144.5	797900	200100	1065.35	0.557026	465.357	6.27576	471.304	2.13595	0.769238	0.200501	-2.18654	8.41101	214.234	22.5863	866.176	500.94	500.94	730.084	708.399	708.399	10.5506	810.224	1986.33	5.44876	0.00379084
BN	2007-07-17	143	780600	217200	1173.09	1.14855	497.886	6.53631	480.645	2.17886	0.951213	0.217679	-2.14798	8.32089	218.43	25.0075	956.164	506.435	506.435	777.845	749.864	749.864	10.4828	817.543	2059.57	5.45002	0.00416208
BN	2007-09-10	145	780600	217200	1186.74	0.904438	497.608	8.28069	479.757	2.25625	0.886121	0.217679	-2.17796	8.42684	215.142	23.4887	820.119	496.837	496.837	722.99	704.55	704.55	10.4671	819.534	2067.6	5.45036	0.00420721
BN	2007-10-17	146	776600	221200	1098.07	0.937222	548.373	10.7682	477.603	2.29578	0.831319	0.221688	-2.21389	8.53188	211.237	21.8922	715.079	486.214	486.214	668.766	657.483	657.483	10.3903	829.094	2116.86	5.45199	0.0038783
BN	2007-11-08	144.6	773600	224200	1107.18	1.35728	546.492	10.7088	479.953	2.282	0.961132	0.224694	-2.16053	8.50838	217.035	24.5744	731.492	487.987	487.987	680.846	668.544	668.544	10.3743	830.969	2132.64	5.4523	0.00390763
BN	2007-12-03	145.1	776300	221700	1093.86	0.837776	499.274	11.2261	437.315	2.07985	0.813291	0.222144	-2.18628	8.7014	214.227	23.2117	598.976	468.776	468.776	580.825	574.239	574.239	10.5203	812.536	2051.03	5.44916	0.0038887
BN	2008-01-10	n.m.	774700	223100	1115.3	1.06677	552.086	12.2819	481.319	2.27834	0.922179	0.223592	-2.17698	8.56757	215.238	23.7112	685.076	482.36	482.36	650.12	640.602	640.602	10.3568	833.314	2139.06	5.4527	0.00393273
BN	2008-02-05	144	780500	217400	1089.71	0.5438	514.764	12.1435	456.622	2.28533	0.849128	0.217858	-2.17547	8.67835	215.414	23.6167	615.201	472.086	472.086	593.674	586.886	586.886	10.4556	820.978	2073.9	5.45061	0.00386102
BN	2008-03-17	145	765900	232000	1129.93	0.739086	526.999	12.4714	493.405	2.28688	0.991381	0.232488	-2.17828	8.4943	215.08	23.9136	734.019	488.054	488.054	688.121	675.656	675.656	10.284	842.284	2200.26	5.45418	0.00397074
BN	2008-04-02	145.6	786000	212000	1104.81	0.45045	483.507	11.7387	466.864	2.16952	1.16845	0.212425	-2.03249	8.64821	231.374	31.5376	637.886	476.289	476.289	610.226	602.759	602.759	10.4553	821.383	2061.21	5.45068	0.00391389
BN	2008-05-13	145.3	768700	229100	1176.57	0.734429	547.942	12.8478	524.755	2.49311	0.988889	0.229605	-2.19908	8.412	212.826	22.8109	817.344	496.362	496.362	731.496	713.172	713.172	10.2114	852.164	2231.72	5.45578	0.00411945
BN	2008-06-11	146.2	772100	225700	1234.86	1.00545	519.305	11.465	495.85	2.39108	1.05843	0.226198	-2.13655	8.47514	219.671	25.8821	759.326	490.938	490.938	698.18	684.018	684.018	10.3536	833.552	2147.22	5.45274	0.00435393
BN	2008-07-15	150.6	771800	226000	1177.1	1.44526	552.762	11.0804	512.084	2.40521	0.933362	0.226498	-2.20589	8.4031	212.093	22.3986	832.347	497.669	497.669	735.936	716.565	716.565	10.2851	842.532	2184.21	5.45422	0.00413612
BN	2008-09-17	146.9	770000	228000	1090	0.613	505	10.6	488	2.3	0.945	0.228457	-2.18443	8.45965	214.418	23.4876	770.818	492.049	492.049	706.338	691.371	691.371	10.327	836.889	2167.01	5.45329	0.00383825
BN	2008-10-09	148.2	772000	226000	1110	1.13	538	11.2	502	2.39	0.943	0.226453	-2.19268	8.44276	213.524	23.0268	790.274	493.969	493.969	715.13	698.795	698.795	10.2903	841.846	2181.33	5.45411	0.00390133
BN	2008-11-17	145.5	779000	218000	1140	0.841	523	11.6	487	2.26	0.847	0.218656	-2.20656	8.54204	212.032	22.1473	709.947	485.75	485.75	663.718	652.717	652.717	10.3763	831.104	2116.7	5.45233	0.00402325
BN	2008-12-17	147.3	785000	213000	1100	0.914	489	11	452	2.03	0.829	0.213427	-2.17009	8.67194	216.01	23.7532	622.092	473.638	473.638	597.911	590.949	590.949	10.5105	814.346	2035.59	5.44947	0.00390771
BN	2009-01-15	146.5	782000	216000	1130	0.689	493	11.4	439	1.96	0.766	0.216433	-2.19948	8.72542	212.802	22.417	589.055	467.34	467.34	569.74	563.216	563.216	10.5498	809.227	2022.68	5.44858	0.0040225
BN	2009-02-24	145.7	774000	223000	1160	1.48	570	12.1	493	2.37	0.858	0.223671	-2.21892	8.51806	210.691	21.7157	724.421	487.221	487.221	675.843	663.99	663.99	10.337	835.893	2149.65	5.45313	0.0040863
BN	2009-03-10	145.2	777000	221000	1160	0.771	509	11.4	459	2.22	0.893	0.221443	-2.16493	8.62695	216.56	24.2511	645.05	476.743	476.743	619.582	611.919	611.919	10.4699	818.929	2075.15	5.45026	0.00411338
BN	2009-03-25	141	776000	222000	1140	0.357	491	11.3	456	2.14	0.768	0.222445	-2.23009	8.63031	209.492	21.1781	642.039	476.208	476.208	617.683	610.139	610.139	10.4699	818.863	2077.55	5.45025	0.00404256
BN	2009-04-15	145.2	778000	220000	1160	0.955	505	10.3	452	2.24	0.894	0.220441	-2.15524	8.61378	217.625	24.7158	654.73	478.278	478.278	626.541	618.478	618.478	10.5138	813.46	2050.3	5.44932	0.00412231
BN	2009-05-15	n.m.	788000	210000	1110	0.588	452	8.97	426	2	0.79	0.210421	-2.15748	8.69904	217.4	24.2983	607.677	471.404	471.404	584.789	578.137	578.137	10.651	797.206	1958.7	5.44647	0.00397055
BN	2009-06-22	146	784000	214000	1100	0.618	506	9.38	472	2.34	0.89	0.214429	-2.16065	8.52329	217.044	24.2571	730.169	488.297	488.297	673.593	661.274	661.274	10.4595	820.712	2063.78	5.45057	0.00389787
BN	2009-07-14	145.9	773000	225000	1130	0.633	487	8.72	476	2.08	0.818	0.225451	-2.22886	8.43062	209.621	21.3144	804.242	495.268	495.268	721.437	704.109	704.109	10.4203	824.988	2110.52	5.45129	0.00399746
BN	2009-09-28	n.m.	777000	221000	1010	0.632	504	9.15	468	2.25	1.19	0.221443	-2.04867	8.49773	229.506	30.8464	744.698	489.559	489.559	686.451	673.261	673.261	10.4098	826.602	2106.16	5.45157	0.0035707
BN	2009-10-19	145	774000	224000	1110	0.871	532	9.33	482	2.41	1.05	0.224449	-2.12336	8.44241	221.134	26.5428	793.579	494.32	494.32	715.232	698.67	698.67	10.3882	829.178	2124.74	5.452	0.0039203
BN	2009-11-24	n.m.	762000	236000	1090	0.957	548	9.48	477	2.48	1.01	0.236473	-2.16515	8.41764	216.505	24.7026	799.803	494.767	494.767	729.019	711.844	711.844	10.3453	833.976	2177.85	5.45281	0.00384254
BN	2009-12-21	145	766000	232000	1080	0.602	498	8.71	453	2.28	1.08	0.232465	-2.10393	8.48705	223.27	27.9095	740.327	488.762	488.762	691.955	679.068	679.068	10.4517	820.519	2111.48	5.45053	0.00382729
BN	2010-01-05	145.9	762000	236000	1100	0.777	510	8.88	460	2.37	1.13	0.236473	-2.10064	8.45229	223.625	28.2415	766.018	491.467	491.467	710.517	695.801	695.801	10.416	824.825	2140.31	5.45127	0.00389158
BN	2010-01-14	145.5	776000	222000	926	0.843	524	9.12	465	2.41	1.03	0.222445	-2.11111	8.50328	222.5	27.1584	738.578	488.858	488.858	683.555	670.776	670.776	10.3786	830.553	2124.8	5.45223	0.00326871
BN	2010-02-23	145	788000	210000	873	0.674	513	9.2	450	2.38	0.956	0.210421	-2.09845	8.61482	223.946	27.4723	662.164	480.057	480.057	627.551	619.039	619.039	10.4554	821.505	2056.46	5.4507	0.00309253
BN	2010-03-17	145.2	781000	217000	911	0.963	522	9.56	448	2.34	0.956	0.217435	-2.11463	8.60949	222.122	26.7952	660.175	479.273	479.273	629.181	620.849	620.849	10.4462	822.207	2077.72	5.45082	0.00322625
BN	2010-04-14	146	777000	221000	1000	0.759	515	9.89	443	2.33	1.15	0.221443	-2.03968	8.62687	230.524	31.4188	645.098	476.751	476.751	619.619	611.955	611.955	10.483	817.267	2068.41	5.44997	0.00354835
BN	2010-05-10	146.1	767000	231000	1010	0.78	542	10.9	462	2.44	1.31	0.231463	-2.02619	8.55443	232.015	32.693	687.015	482.29	482.29	656.406	646.819	646.819	10.3646	831.786	2154.75	5.45244	0.00356352
BN	2010-06-16	146.2	757000	241000	1020	0.8	570	11.9	480	2.54	1.23	0.241483	-2.09426	8.48495	224.321	28.7963	729.748	487.488	487.488	693.174	680.891	680.891	10.2537	845.751	2240.53	5.45475	0.00357976
BN	2010-09-15	n.m.	779000	219000	847	0.607	534	11.8	461	2.44	0.92	0.219439	-2.14882	8.64278	218.334	25.0181	636.234	475.491	475.491	611.717	604.359	604.359	10.3294	837.166	2143.07	5.45334	0.00298226
BN	2010-10-21	146.5	773000	225000	872	1.13	566	12.1	458	2.4	0.925	0.225451	-2.15873	8.63986	217.232	24.6906	633.534	474.652	474.652	612.255	605.008	605.008	10.323	837.606	2161.48	5.45341	0.00306976
BN	2010-10-21	146.5	781000	217000	843	0.672	491	11	428	2.18	0.892	0.217435	-2.12489	8.74976	220.983	26.2307	575.49	464.468	464.468	556.91	550.245	550.245	10.4641	819.926	2068.54	5.45043	0.00298811
BN	2010-11-29	145.2	777000	221000	933	0.657	503	10.7	448	2.38	0.964	0.221443	-2.12117	8.64156	221.385	26.5648	635.512	475.234	475.234	612.009	604.686	604.686	10.4235	824.842	2099.06	5.45127	0.00330075
BN	2010-12-07	144.5	775000	223000	926	0.721	581	12.1	510	2.74	0.966	0.223447	-2.1816	8.46141	214.735	23.4791	776.073	492.69	492.69	705.302	689.976	689.976	10.1877	855.766	2228.32	5.45635	0.00323789
BN	2011-01-20	147.2	780000	219000	946	0.633	485	10.1	446	2.37	0.897	0.219219	-2.14489	8.63492	218.767	25.2169	641.522	476.344	476.344	615.815	608.269	608.269	10.4558	820.867	2077.06	5.45059	0.00335196
BN	2011-03-15	145.3	767000	232000	902	0.642	503	11.3	463	2.38	1.063	0.232232	-2.11974	8.56445	221.515	27.0037	678.813	481.148	481.148	651.069	641.922	641.922	10.3047	839.574	2188.55	5.45374	0.003173
BN	2011-05-02	145.6	767000	231000	836	0.612	495	11.3	467	2.4	1.067	0.231463	-2.11997	8.55138	221.492	26.9649	689.304	482.595	482.595	658.013	648.299	648.299	10.2599	845.549	2210.5	5.45471	0.00293422
BN	2011-05-24	145	765000	234000	839	0.642	479	11.1	443	2.38	1.04	0.234234	-2.11492	8.62514	222.044	27.3428	635.697	474.558	474.558	618.801	611.488	611.488	10.3376	835.129	2176.19	5.453	0.00295639
BN	2011-06-10	146.7	776000	223000	798	0.36	479	11.3	455	2.31	0.927	0.223223	-2.14937	8.63217	218.264	25.107	640.212	475.869	475.869	616.598	609.122	609.122	10.3165	838.605	2159.29	5.45358	0.00280819
BN	2011-07-25	146.8	783000	215000	913	0.504	474	11.7	449	2.28	0.984	0.215431	-2.09793	8.70181	223.989	27.67	602.939	470.085	470.085	582.142	575.553	575.553	10.4218	825.462	2085.46	5.45137	0.00322921
BN	2011-09-12	146.5	783000	216000	895	0.543	472	12	438	2.16	1.187	0.216216	-2.00772	8.75388	234.181	33.3204	574.003	464.269	464.269	555.118	548.446	548.446	10.4458	822.34	2075.02	5.45084	0.00316942
BN	2011-11-04	145.3	777000	221000	1030	0.478	493	12.8	457	2.34	0.983	0.221443	-2.12133	8.68484	221.367	26.5558	608.963	470.689	470.689	589.575	582.892	582.892	10.4059	827.098	2108.16	5.45165	0.0036407
BN	2011-11-29	144.9	777000	221000	969	0.452	479	12.7	457	2.21	1.102	0.221443	-2.07171	8.68143	226.91	29.4227	610.967	471.051	471.051	591.342	584.628	584.628	10.3808	830.343	2121.22	5.4522	0.00342077
BN	2012-01-13	143.2	770000	228000	994	0.894	516	12.6	486	2.27	1.001	0.228457	-2.15765	8.54185	217.344	24.8397	699.827	484.064	484.064	663.194	652.872	652.872	10.2674	844.753	2198.69	5.45458	0.00348981
BN	2012-01-31	144.2	774000	224000	1010	0.512	484	12	481	2.19	1.103	0.224449	-2.10108	8.55532	223.612	27.7966	693.55	483.428	483.428	656.421	646.438	646.438	10.3151	838.703	2163.09	5.45359	0.00355409
BN	2012-03-01	n.m.	755000	243000	1000	0.538	536	12.8	543	2.43	1.276	0.243487	-2.13661	8.29419	219.622	26.449	930.433	505.155	505.155	796.659	769.214	769.214	10.0304	876.155	2369.8	5.45944	0.00347185
BN	2012-04-19	145.5	765000	233000	979	0.492	497	10.9	536	2.42	1.103	0.233467	-2.17028	8.28806	215.951	24.3466	966.918	507.133	507.133	798.04	768.659	768.659	10.1055	866.341	2299.78	5.45798	0.00341036
BN	2012-05-02	146.5	773000	225000	953	0.45	473	10.3	512	2.34	1.116	0.225451	-2.12561	8.37629	220.883	26.4524	865.49	500.298	500.298	749.915	728.154	728.154	10.208	852.886	2222.63	5.45589	0.0033358
BN	2012-06-05	146.5	776000	222000	1060	0.402	501	10.4	521	2.18	1.117	0.222445	-2.12528	8.36278	220.927	26.3721	888.073	501.978	501.978	756.652	733.323	733.323	10.2375	849.123	2199.09	5.45529	0.00371548
BN	2012-06-11	n.m.	766000	232000	1020	0.796	513	10.2	517	2.28	n.a.	0.232465	#VALUE!	8.32607			915.251	503.846	503.846	777.481	751.878	751.878	10.194	854.322	2248.71	5.45612	0.00356845
BN	2012-07-13	144.5	761000	237000	1030	0.471	471	9.3	488	2.24	1.299	0.237475	-2.06817	8.36559	227.252	30.23	854.655	499.485	499.485	757.012	735.692	735.692	10.2823	842.202	2214.31	5.45417	0.00361967
BN	2012-08-23	146.6	768000	230000	1000	0.488	482	9.6	503	2.31	1.052	0.230461	-2.15592	8.35572	217.529	24.9922	881.086	501.437	501.437	761.388	738.364	738.364	10.2456	847.528	2215.59	5.45503	0.00350724
BN	2012-09-20	145	761000	237000	910	0.607	497	9.9	513	2.34	1.272	0.237475	-2.09899	8.30596	223.805	28.373	930.462	504.949	504.949	789.144	762.15	762.15	10.1401	861.335	2291.76	5.45722	0.00317559
BN	2012-09-21	n.m.	783000	215000	877	0.511	481	9.6	499	2.3	1.088	0.215431	-2.10015	8.43248	223.741	27.5432	817.313	496.669	496.669	719.984	701.737	701.737	10.2644	846.011	2167.15	5.45479	0.00307759
BN	2012-10-25	143.5	759000	239000	916	0.419	455	9.5	480	2.26	1.123	0.239479	-2.12902	8.39533	220.469	26.7322	817.585	496.407	496.407	741.248	722.649	722.649	10.2471	846.755	2238.71	5.45491	0.00321356
BN	2012-11-09	144.8	764000	234000	1060	0.512	482	10.2	468	2.15	1.075	0.234469	-2.12496	8.49077	220.931	26.7882	734.457	488.07	488.07	689.991	677.483	677.483	10.3622	831.902	2163.69	5.45246	0.00373977
BN	2012-11-09	144.8	772000	226000	1010	0.482	464	9.6	482	2.17	1.035	0.226453	-2.1346	8.44644	219.886	25.9955	786.584	493.622	493.622	713.203	697.13	697.13	10.3353	835.933	2157.54	5.45313	0.00355785
BN	2012-12-13	144.2	759000	239000	1030	0.544	492	10.6	513	2.32	1.386	0.239479	-2.06651	8.32741	227.432	30.4094	896.85	502.705	502.705	777.89	753.278	753.278	10.1769	856.199	2277.05	5.45642	0.00360098
BN	2013-01-10	143.4	765000	233000	988	0.569	479	10.9	492	2.2	1.036	0.233467	-2.1603	8.43686	217.043	24.8591	785.483	493.418	493.418	718.588	702.522	702.522	10.2466	847.198	2222.94	5.45498	0.00346558
BN	2013-02-05	144	766000	232000	977	0.423	457	10.7	471	2.13	1.071	0.232465	-2.12449	8.50873	220.988	26.747	721.878	486.648	486.648	680.493	668.819	668.819	10.3181	837.798	2182.01	5.45344	0.00343915
BN	2013-03-28	n.m.	765000	233000	1070	0.48	464	11.4	469	2.17	1.106	0.233467	-2.11111	8.5395	222.469	27.5329	696.15	483.435	483.435	664.184	654.081	654.081	10.3507	833.462	2167.22	5.45272	0.00377278
BN	2013-04-16	144.5	755000	243000	1110	0.535	530	12.4	519	2.35	1.357	0.243487	-2.09025	8.35893	224.762	29.1086	849.394	499.204	499.204	761.39	740.167	740.167	10.1522	859.313	2301.77	5.4569	0.00387632
BN	2013-05-28	144.6	765000	233000	1070	0.6	495	11.4	513	2.34	1.176	0.233467	-2.1234	8.38373	221.106	26.841	841.738	498.406	498.406	746.846	726.638	726.638	10.2082	852.349	2243.71	5.45581	0.00374607
BN	2013-06-20	144.5	761000	237000	1080	0.497	499	11.2	524	2.33	1.296	0.237475	-2.10009	8.32268	223.683	28.3089	907.856	503.428	503.428	780.113	754.796	754.796	10.1643	858.037	2278.48	5.4567	0.00377328
BN	2013-07-26	145.6	738000	260000	1190	0.806	548	12	581	2.46	1.337	0.260521	-2.18496	8.07973	214.3	24.4505	1238.52	521.852	521.852	922.07	869.677	869.677	9.93812	888.203	2473.76	5.46113	0.00411545
BN	2013-08-23	145.6	719000	279000	1320	0.541	552	12.1	606	2.58	1.486	0.279559	-2.19933	7.93421	212.71	24.3379	1431.7	532.019	532.019	1017.75	943.904	943.904	9.83843	901.562	2594.91	5.46286	0.00454692
BN	2013-09-23	145.4	759000	239000	1060	0.459	464	10.2	511	2.23	1.268	0.239479	-2.10346	8.31749	223.302	28.1838	909.756	503.612	503.612	783.259	757.675	757.675	10.2007	852.984	2264.02	5.45591	0.0037102
BN	2013-10-17	145	762000	236000	1030	0.448	451	9.9	506	2.15	1.218	0.236473	-2.10946	8.33394	222.644	27.7314	895.587	502.546	502.546	773.889	749.541	749.541	10.2202	850.547	2245.26	5.45552	0.00360842
BN	2013-11-27	144	756000	242000	1190	0.543	481	10.7	532	2.31	1.256	0.242485	-2.13222	8.25601	220.109	26.657	989.282	508.742	508.742	817.343	785.625	785.625	10.1677	857.266	2290.42	5.45658	0.00415875
BN	2013-12-17	144.2	761000	236000	1290	0.499	457	10.3	511	2.21	1.185	0.23671	-2.12623	8.33178	220.785	26.7933	897.816	502.709	502.709	775.088	750.562	750.562	10.2948	840.598	2205.56	5.45391	0.00453612
BN	2014-01-27	142	774000	224000	945	0.839	458	10.1	486	2.1	1.18	0.224449	-2.07626	8.46249	226.388	29.256	773.651	492.425	492.425	704.757	689.601	689.601	10.2948	841.379	2173.83	5.45403	0.00332199
BN	2014-02-19	142.6	748000	250000	1010	0.462	444	11	524	2.29	1.293	0.250501	-2.13177	8.26173	220.137	26.9563	954.311	507.101	507.101	815.985	785.974	785.974	10.0845	868.19	2359.59	5.45826	0.00351608
BN	2014-03-20	143.7	730000	268000	1060	0.326	461	11.4	533	2.4	1.334	0.268537	-2.16638	8.17515	216.3	25.6849	1007.93	512.38	512.38	869.698	831.868	831.868	10.0009	878.839	2462.11	5.45982	0.00367689
BN	2014-04-01	143.6	763475	234569	1006.85	0.396252	432.107	11.9294	501.944	2.17078	1.19803	0.235029	-2.10966	8.43491	222.625	27.6696	784.92	493.357	493.357	719.712	703.66	703.66	10.2034	852.894	2250.49	5.45589	0.0035243
BN	2014-05-26	144.5	743932	253843	1195.56	0.487311	482.413	12.0734	532.819	2.2989	1.37177	0.254409	-2.12233	8.25708	221.167	27.6267	947.524	506.97	506.97	819.456	789.448	789.448	10.102	865.538	2361.08	5.45786	0.00416591
BN	2014-06-06	144	746411	251285	1177.01	0.609092	535.016	13.2467	575.754	2.54123	1.35779	0.251865	-2.15459	8.1729	217.626	25.7547	1094.2	514.845	514.845	865.946	825.404	825.404	9.96855	884.37	2429.65	5.4606	0.00407546
BN	2014-07-11	144.3	731388	266269	1211.18	0.489006	535.413	13.907	578.905	2.4288	1.45437	0.266894	-2.16111	8.12407	216.879	25.9118	1102.98	517.137	517.137	898.702	853.765	853.765	9.90457	892.656	2513.58	5.46172	0.00418298
BN	2014-08-21	144.6	763232	234740	998.239	0.539737	480.326	12.6724	532.167	2.35929	1.35935	0.235217	-2.08065	8.35871	225.861	29.3825	867.536	500.458	500.458	760.417	738.223	738.223	10.0969	867.409	2309.31	5.45814	0.00347608
BN	2014-09-23	142.9	768959	229058	998.072	0.574732	462.307	11.1108	507.612	2.07779	1.18544	0.229513	-2.10569	8.40729	223.083	27.706	822.607	496.817	496.817	733.979	715.273	715.273	10.2148	851.709	2229.63	5.45571	0.00349507
BN	2014-10-17	145.3	745899	251877	1140.98	0.426443	502.795	12.6404	564.403	2.36746	1.41455	0.252438	-2.12948	8.18494	220.384	27.1521	1069.48	513.704	513.704	859.349	820.449	820.449	9.99133	881.111	2418.31	5.46015	0.00395485
BN	2014-10-30	144.9	755010	242619	1186.55	0.591553	554.217	13.0643	613.975	2.5487	1.47162	0.243196	-2.12733	8.09037	220.646	26.9528	1333.27	523.173	523.173	909.601	856.125	856.125	9.90659	893.73	2439.14	5.46186	0.00409658
BN	2014-12-10	144.2	767200	230607	1103.3	0.463502	501.21	11.9598	572.803	2.36444	1.29933	0.231114	-2.12225	8.22246	221.24	26.8261	1085.24	513.28	513.28	832.898	795.671	795.671	10.048	874.455	2324.94	5.45919	0.00383269
BN	2015-01-13	144.8	755767	241987	1123.21	0.534271	506.319	12.4206	600.253	2.42752	1.38252	0.242532	-2.14307	8.11057	218.913	26.065	1282.64	521.517	521.517	897.988	847.409	847.409	9.92866	890.607	2424.58	5.46145	0.00388157
BN	2015-02-10	144.6	755855	241897	1185.96	0.792884	484.729	11.4632	562.554	2.27073	1.43352	0.242442	-2.09895	8.18877	223.795	28.5534	1106.54	514.715	514.715	854.356	814.509	814.509	10.0673	871.061	2346.06	5.45869	0.00412456
BN	2015-03-11	144.6	756642	241130	1186.99	0.576272	475.404	11.5283	550.769	2.15686	1.52841	0.241669	-2.06009	8.2312	228.146	30.8965	1032.39	511.069	511.069	830.762	796.055	796.055	10.1041	866.017	2323.35	5.45793	0.00413538
BN	2015-04-21	144.7	763412	234418	1095.16	0.973907	492.846	11.2891	566.871	2.31647	1.44134	0.234928	-2.08195	8.19977	225.716	29.2933	1115.5	514.758	514.758	846.236	806.717	806.717	10.0534	873.47	2332.61	5.45905	0.00380566
BN	2015-05-19	142.4	769742	228170	1053.03	0.730614	471.796	11.3167	548.9	2.2309	1.38579	0.228648	-2.06971	8.28287	227.11	29.8064	987.911	508.274	508.274	799.872	769.299	769.299	10.1139	865.495	2282.06	5.45785	0.00366933
BN	2015-06-15	144.3	743759	253882	1226.25	0.4917	504.906	11.5901	612.828	2.48357	1.53539	0.254482	-2.13432	7.99583	219.845	26.9522	1540.54	529.838	529.838	968.462	901.56	901.56	9.89357	894.942	2480.96	5.46202	0.00423211
BN	2015-07-22	145.6	755000	242000	1150	0.43	495	10.9	626	2.47	1.48	0.242728	-2.13218	7.9791	220.112	26.6672	1748.31	532.742	532.742	973.201	901.452	901.452	9.88534	896.815	2449.89	5.46226	0.00396676
BN	2015-08-25	145.8	748000	250000	1170	0.706	503	10.6	609	2.44	1.48	0.250501	-2.13839	7.9845	219.407	26.5888	1630.51	531.304	531.304	973.367	903.856	903.856	9.91039	892.752	2458.99	5.46174	0.00404063
BN	2015-09-01	143.2	747000	251000	1240	0.775	521	10.5	642	2.64	1.62	0.251503	-2.12437	7.88466	220.95	27.4076	2161.19	539.652	539.652	1033.28	945.346	945.346	9.84674	901.89	2498.95	5.4629	0.00427095
BN	2015-10-07	146	734000	264000	1230	0.851	544	10.6	668	2.62	1.51	0.264529	-2.20171	7.76738	212.483	23.7356	2817.83	548.015	548.015	1113.61	1002.97	1002.97	9.72501	919.075	2612.91	5.46483	0.00421766
BN	2015-10-23	143.6	760000	238000	1160	0.545	468	9.48	559	2.38	1.36	0.238477	-2.10964	8.13384	222.619	27.7913	1246.38	520.032	520.032	883.634	835.787	835.787	10.1074	865.762	2312.59	5.4579	0.00404169
BN	2015-11-23	144.8	776000	222000	1030	1.16	509	10	608	2.38	1.31	0.222445	-2.12312	8.07748	221.166	26.4902	1514.73	526.948	526.948	909.649	850.93	850.93	9.97957	884.616	2338.67	5.46064	0.00356615
BN	2015-12-17	144.8	767000	230000	1150	0.806	470	9.78	576	2.35	1.35	0.230692	-2.10702	8.1261	222.932	27.6707	1308.35	521.714	521.714	885.433	835.302	835.302	10.0822	869.725	2304.93	5.45849	0.00400134
BN	2016-01-26	145.3	747424	250246	1205.98	0.827843	501.549	10.1929	608.5	2.4428	1.44243	0.25083	-2.14997	7.96716	218.136	25.9688	1701.47	532.739	532.739	983.701	911.183	911.183	9.92747	890.285	2450.14	5.46141	0.00416802
BN	2016-02-24	144.8	729590	267989	1268.28	0.552593	511.141	10.9023	625.766	2.49067	1.59319	0.26864	-2.15918	7.87607	217.085	26.0755	1843.2	538.295	538.295	1047.59	960.809	960.809	9.82466	904.153	2566.78	5.46317	0.00436561
BN	2016-03-31	143.2	734448	263102	1212.96	0.728786	542.041	11.5016	679.804	2.69661	1.56953	0.263748	-2.19078	7.77494	213.664	24.2585	2766.56	547.465	547.465	1108.28	999.226	999.226	9.6842	925.208	2634.85	5.46544	0.00415347
BN	2016-04-29	145	743253	254336	1275.44	0.627056	493.89	10.5162	627.514	2.46577	1.52751	0.254951	-2.14791	7.91051	218.351	26.2192	1925.26	537.035	537.035	1019.37	937.058	937.058	9.88152	896.652	2489.42	5.46224	0.00439964
BN	2016-05-20	145	736668	260908	1272.44	0.570053	504.606	10.5572	633.672	2.45315	1.70364	0.261542	-2.1197	7.86869	221.437	28.0348	2040.57	539.775	539.775	1048.22	958.798	958.798	9.83764	902.648	2536	5.46299	0.00438174
BN	2016-06-22	144	741278	256264	1241.9	0.754338	547.505	11.6367	653.433	2.50093	1.65745	0.256895	-2.13447	7.87626	219.823	27.0283	2098.02	539.699	539.699	1041.12	952.434	952.434	9.78491	910.627	2552.24	5.46392	0.00426738
BN	2016-07-06	144.5	735897	261616	1210.94	0.678775	571.867	11.7004	688.895	2.49892	1.71029	0.262268	-2.15593	7.76519	217.455	26.0331	2958.56	548.471	548.471	1113.63	1002.11	1002.11	9.66586	928.037	2640.91	5.4657	0.00414408
BN	2016-08-30	145.1	740112	257412	1311.5	0.540514	507.631	10.2797	642.969	2.47818	1.58597	0.258051	-2.14923	7.84578	218.199	26.2531	2292.83	542.141	542.141	1060.46	965.766	965.766	9.84382	901.943	2521.22	5.4629	0.00451715
BN	2016-09-26	145.1	742342	255191	1257.82	0.535477	519.078	11.2764	674.035	2.59134	1.60382	0.255822	-2.15979	7.81299	217.049	25.609	2671.87	545.192	545.192	1079.63	977.617	977.617	9.74784	916.156	2570.69	5.46453	0.00431607
BN	2016-10-25	144.9	743983	253672	1241.76	0.566448	467.902	10.0282	621.131	2.41329	1.65801	0.254268	-2.1063	7.91047	222.942	28.551	1938.02	537.123	537.123	1019.05	936.623	936.623	9.89451	894.818	2479.75	5.46201	0.0042858
BN	2016-11-28	143.5	725440	272047	1341.7	0.779052	499.533	10.5296	657.222	2.58758	1.6986	0.272732	-2.16166	7.75933	216.805	26.0827	2524.74	547.741	547.741	1124.07	1012.93	1012.93	9.75659	913.954	2621.45	5.46429	0.0046064
BN	2016-12-15	142.9	728275	269117	1326.26	0.618402	542.68	11.622	723.347	2.85616	1.81876	0.269821	-2.16722	7.64714	216.207	25.6841	4719.52	557.683	557.683	1196.78	1057.66	1057.66	9.5962	938.181	2709.2	5.46653	0.00453001
BN	2017-01-11	144.1	721845	275573	1323.9	0.514006	521.162	11.3506	722.752	2.70822	1.79966	0.276286	-2.18559	7.6126	214.199	24.9348	4777.93	559.924	559.924	1225.49	1078.18	1078.18	9.57353	941.325	2746.17	5.46675	0.0045196
BN	2017-02-20	144.2	732393	265313	1185.16	0.456108	466.67	8.95252	630.39	2.5067	1.79945	0.265923	-2.10348	7.78873	223.219	29.1538	2529.55	546.035	546.035	1100.8	995.195	995.195	9.81452	905.785	2563.92	5.46337	0.00407768
BN	2017-03-16	144.3	743504	254215	1125.8	0.677238	492.477	9.00686	649.886	2.52306	1.57759	0.254796	-2.14876	7.78316	218.258	26.1677	3092.48	547.85	547.85	1097.83	989.077	989.077	9.78626	910.545	2544.72	5.46392	0.00386852
BN	2017-04-18	144.7	742492	255061	1265	0.512412	498.284	8.41993	668.929	2.52552	1.65501	0.255687	-2.14253	7.69991	218.939	26.5387	4949.02	554.842	554.842	1152.09	1023.92	1023.92	9.79131	909.754	2544.59	5.46383	0.00434775
BN	2017-05-12	143.8	713955	283583	1171.8	0.696732	544.927	9.22484	732.486	2.92684	1.77705	0.284283	-2.21411	7.46776	211.115	23.7503	13732.4	571.728	571.728	1337.98	1149.11	1149.11	9.48622	954.391	2830.34	5.4675	0.00399345
BN	2017-05-30	144.5	716655	280827	1291.46	0.671246	509.737	8.94868	704.754	2.82693	1.90158	0.281536	-2.16205	7.53241	216.741	26.3701	7227.27	566.324	566.324	1287.22	1117.87	1117.87	9.60561	936.186	2745.2	5.46638	0.00441268
BN	2017-07-07	144.8	720924	276771	1226.77	0.384218	451.298	7.76831	615.997	2.598	1.64376	0.27741	-2.15797	7.72145	217.195	26.4476	2671.86	550.439	550.439	1152.19	1032.88	1032.88	9.83434	902.272	2590.13	5.46294	0.00422492
BN	2017-08-29	146.1	733751	264145	1067.04	0.455265	451.573	8.27667	572.504	2.44967	1.49191	0.264702	-2.14033	7.9271	219.158	26.975	1677.12	534.43	534.43	1014.25	936.691	936.691	9.93971	887.74	2485.92	5.46107	0.00369075
BN	2018-02-12	142.6	688888	308695	1203.64	0.993024	534.95	11.652	656.08	2.82085	1.73488	0.309443	-2.22907	7.66164	209.473	23.8373	1731.34	552.138	552.138	1219.5	1089.61	1089.61	9.55644	942.484	2882.96	5.46683	0.0041083
BN	2018-03-19	138	730227	267576	1061.57	0.635409	495.582	11.4562	625.292	2.50711	1.62288	0.268165	-2.14979	7.9011	218.113	26.5723	1732.66	536.223	536.223	1031.91	949.972	949.972	9.74507	915.902	2613.01	5.4645	0.00364289
BN	2018-04-18	140.3	722154	275517	1221.63	0.649929	472.968	12.5921	618.439	2.39405	1.73049	0.27616	-2.13465	7.92928	219.75	27.7099	1495.17	532.852	532.852	1018.94	943.638	943.638	9.78003	910.311	2618.86	5.46389	0.00419807
BN	2018-06-25	142.8	720644	276959	1253.74	0.60699	484.376	16.2943	636.912	2.58006	1.80866	0.277624	-2.13142	7.98419	220.101	27.9497	1317.62	527.95	527.95	986.156	920.961	920.961	9.701	921.981	2672.22	5.46513	0.00429619
BN	2018-07-09	142.8	720026	277598	1216.06	0.514718	492.218	16.4075	647.798	2.52068	1.7611	0.278259	-2.15172	7.95526	217.875	26.8228	1387.7	530.366	530.366	1004.11	933.909	933.909	9.65743	928.496	2701.3	5.46574	0.00416118
BN	2018-08-30	143	734893	262668	1248.43	0.65052	496.7	15.7562	671.373	2.49521	1.76715	0.26331	-2.13287	7.93509	219.981	27.3448	1664.86	533.92	533.92	1008.71	932.419	932.419	9.67803	926.156	2637.09	5.46552	0.00427406
BN	2018-09-26	143.5	719379	278079	1332.06	0.611899	491.761	16.0307	695.793	2.54641	1.79704	0.278788	-2.17513	7.8187	215.326	25.569	1904.41	541.988	541.988	1089.8	992.771	992.771	9.58502	939.452	2748.07	5.46662	0.00454884
BN	2018-10-16	144.4	701375	295815	1413.55	0.669574	564.311	17.2936	811.3	2.84506	2.04102	0.296648	-2.2244	7.51394	209.993	23.6436	3942.09	566.258	566.258	1314.31	1141.55	1141.55	9.28411	985.648	3009.06	5.46785	0.00481349
BN	2018-11-19	143	721275	276030	1349.72	0.761385	536.3	16.0908	789.486	2.65453	2.01417	0.276776	-2.1761	7.60864	215.225	25.4486	4821.08	560.211	560.211	1228.65	1080.33	1080.33	9.39606	968.733	2858.71	5.46794	0.00459521
BN	2018-12-04	143.6	727643	269666	1379.7	0.735661	514.596	15.9263	777.008	2.53075	1.93723	0.270393	-2.17215	7.65726	215.669	25.4412	4335.98	556.744	556.744	1190.29	1053.89	1053.89	9.45794	959.379	2796.4	5.4677	0.0046998
BN	2019-01-07	142.8	718932	278251	1440.8	0.730882	529.367	17.3661	826.161	2.65424	2.21018	0.279037	-2.16039	7.55376	216.928	26.3729	6778.77	564.736	564.736	1269.58	1106.14	1106.14	9.3323	978.64	2907.49	5.46797	0.0049049
BN	2019-02-18	141.2	744954	252381	1404.7	0.998391	484.7	16.3604	754.38	2.3029	1.88348	0.253055	-2.13256	7.7899	220.043	27.0012	3080.73	547.492	547.492	1092.62	985.053	985.053	9.57906	941.628	2661.96	5.46678	0.00479522
BN	2019-03-11	142.7	736488	260517	1610.98	0.94004	515.781	19.7866	844.809	2.58357	2.17491	0.2613	-2.13799	7.64216	219.424	26.9859	6725.11	559.125	559.125	1194.32	1052.44	1052.44	9.39718	969.207	2800.68	5.46795	0.00548457
BN	2019-04-08	141	701471	294384	2732.96	0.651582	513.052	21.9555	871.144	2.57893	2.5352	0.295609	-2.15898	7.49631	217.039	27.0501	4551.57	567.914	567.914	1326.53	1148.26	1148.26	9.4244	963.551	2913.76	5.46783	0.0093068
BN	2019-05-21	143.8	719774	276678	2012.66	1.12633	557.48	25.0246	949.021	2.64569	2.29916	0.277663	-2.20048	7.47607	212.59	24.2174	36854	571.768	571.768	1326.06	1138.78	1138.78	9.20712	998.462	2981.02	5.46729	0.00686252
BN	2019-06-17	142.2	734799	262032	1808.35	0.91352	499.702	21.7269	835.507	2.33429	2.50112	0.262865	-2.076	7.69552	226.288	30.7241	4210.13	554.345	554.345	1159.46	1031.48	1031.48	9.44376	961.911	2777.85	5.46779	0.00615881
BN	2019-07-15	140.2	699042	297013	2399.55	0.830562	536.509	23.0798	977.598	2.47985	2.83871	0.298189	-2.16531	7.30783	216.344	26.7927	-1.00262e+07	584.396	584.396	1478.1	1236.35	1236.35	9.16782	1004.17	3091.53	5.46688	0.00818934
BN	2019-08-05	140.6	728742	267925	1880.07	0.579055	497.426	21.2161	927.356	2.44058	2.62456	0.268821	-2.11363	7.47996	222.087	28.6593	-27583.2	572.487	572.487	1316.07	1128.52	1128.52	9.27522	987.994	2903.8	5.46778	0.00640313
BN	2019-09-04	142	716897	279540	2039.39	1.05834	532.129	19.6964	964.849	2.41586	2.59606	0.28054	-2.16113	7.33193	216.843	26.3851	-6826.81	584.584	584.584	1443.52	1206.95	1206.95	9.21056	997.831	2990.42	5.46732	0.00695305
BN	2019-10-08	143.5	728634	267973	1843.64	1.01779	522.705	18.3898	1004.23	2.47665	2.48842	0.268885	-2.17149	7.27919	215.744	25.4253	-3162.17	591.199	591.199	1479.69	1220.11	1220.11	9.15737	1006.59	2977.1	5.46668	0.00629503
BN	2019-11-11	141.9	728541	267944	2017.71	0.636114	488.113	17.4845	987.924	2.51672	2.4961	0.268889	-2.16305	7.28553	216.662	25.8754	-3251.72	590.583	590.583	1474.12	1217.1	1217.1	9.2288	995.307	2932.85	5.46747	0.00687687
BN	2019-12-02	140.1	717612	278768	2039.98	0.578052	515.797	19.2754	1041.38	2.3451	2.7818	0.279781	-2.16264	7.19288	216.681	26.2762	-2945.81	598.116	598.116	1566.52	1273.07	1273.07	9.0933	1016.49	3061.43	5.46565	0.00698195
BN	2020-01-08	139	709704	286542	2097.1	0.854204	525.86	20.4802	1106.48	2.55279	3.04646	0.287622	-2.16626	7.08267	216.268	26.3567	-2473.81	607.868	607.868	1678.51	1336.52	1336.52	8.96875	1036.23	3173.94	5.46257	0.00722858
BN	2020-02-03	141.5	716356	279766	2190.16	0.667112	519.76	20.0664	1145.72	2.45697	3.07701	0.280855	-2.16262	7.03987	216.681	26.3153	-1895.86	613.782	613.782	1721.28	1353.85	1353.85	8.96012	1037.66	3149.69	5.46229	0.00755423
BN	2020-03-02	141.6	697759	297869	2464.42	1.00227	583.263	21.5197	1298.9	2.73614	3.37161	0.299177	-2.21606	6.77933	210.878	24.1435	-1573.45	636.58	636.58	2009.96	1509.56	1509.56	8.7266	1074.74	3381.29	5.45181	0.00870773
BN	2020-04-06	142.4	715242	278053	5013.86	0.611794	503.036	20.6476	1186.62	2.37168	3.38876	0.27993	-2.13395	6.9913	219.817	27.8897	-1672.63	619.301	619.301	1774.78	1380.14	1380.14	9.25958	990.081	2956.94	5.46771	0.0170791
BN	2020-05-05	141.7	719848	275976	2479.84	0.596134	484.721	20.6118	1240.34	2.49182	3.78009	0.277133	-2.09967	6.92805	223.606	29.8192	-1421.34	627.141	627.141	1848.61	1414.8	1414.8	8.89643	1047.74	3172.97	5.46006	0.00859737
BN	2020-06-04	143	697695	297835	2687.31	0.882284	515.677	21.1784	1128.29	2.53843	3.34504	0.299173	-2.15833	7.01689	217.1	27.2194	-2828.57	611.792	611.792	1745.91	1378.89	1378.89	8.99442	1032.02	3209.19	5.46335	0.00924633
BN	2020-07-01	141.7	726018	269720	2609	0.746424	494.932	21.5663	1128.29	2.53843	3.34504	0.270874	-2.09799	7.13696	223.813	29.6768	-2034.74	605.226	605.226	1614.55	1292.7	1292.7	9.09154	1016.96	3025.87	5.46559	0.00893058
BN	2020-08-03	140.6	725701	269675	2755.48	1.34313	539.293	22.9227	1293.43	2.54048	3.44956	0.270928	-2.14406	6.92549	218.732	26.9876	-1311.68	628.712	628.712	1849.17	1410.75	1410.75	8.88629	1049.33	3152.12	5.45967	0.00956158
BN	2020-09-01	141.9	701653	293419	2752.44	3.75092	741.525	25.0649	1402.43	2.77588	3.52927	0.294872	-2.22056	6.72855	210.406	23.7754	-1335.41	644.556	644.556	2086.91	1543.14	1543.14	8.64908	1086.69	3408.11	5.44698	0.00983426
BN	2020-10-13	141.2	723102	272357	2782.94	0.677852	488.396	22.2647	1243.41	2.54914	3.26021	0.273599	-2.15731	6.97082	217.277	26.3498	-1465.47	622.925	622.925	1796.16	1386.46	1386.46	8.94739	1039.72	3126.28	5.46186	0.00960815
BN	2020-11-03	141.5	715190	280388	2773	0.7	457.56	18.69	1169.5	2.46	3.198	0.281633	-2.15646	6.96953	217.35	26.6812	-1643.81	621.346	621.346	1799.95	1393.87	1393.87	9.03311	1026.04	3107.19	5.46434	0.00951941
BN	2020-12-01	141.2	725874	269809	2610	1.007	484.49	17.4	1201.2	2.52	2.969	0.270979	-2.1772	6.93448	215.119	25.195	-1332.02	627.641	627.641	1838.17	1405.39	1405.39	9.01261	1029.45	3075.07	5.46379	0.00897117
BN	2021-01-12	142.2	710793	284865	2641	1.87	532.77	16.11	1148.1	2.52	2.95	0.286107	-2.19305	6.91951	213.373	24.878	-1603.03	625.821	625.821	1857.93	1425.73	1425.73	9.03921	1025	3122.52	5.4645	0.00906295
BN	2021-02-02	142.1	724341	271484	2568	0.909	472.95	15.63	1114.9	2.53	2.848	0.272622	-2.1665	7.01104	216.278	25.8184	-1562.54	618.546	618.546	1749.34	1362.47	1362.47	9.1318	1010.54	3007.94	5.46631	0.00877584
BN	2021-03-11	143.2	714058	281629	2539	2.333	564.14	15.87	1189.1	2.76	2.822	0.282849	-2.22061	6.86496	210.422	23.3845	-1380.24	633.106	633.106	1926.7	1457.03	1457.03	8.9786	1034.7	3146.77	5.46286	0.0087459
BN	2021-04-06	142.2	722119	273930	2362	1.258	508.46	14.93	1059.2	2.58	2.77	0.275017	-2.16153	7.07094	216.814	26.1694	-1844.69	611.543	611.543	1685.29	1331.7	1331.7	9.17478	1003.67	2990.72	5.46692	0.00806047
BN	2021-04-06	142.2	725657	270365	2304	1.617	534.92	15.5	1119.3	2.68	2.735	0.271445	-2.18321	7.00552	214.467	24.8972	-1521.74	619.374	619.374	1754.84	1364.44	1364.44	9.08392	1018.16	3032.91	5.46545	0.00788927
BN	2021-05-04	142.2	712786	283203	2318	1.134	530.85	15.87	1139.7	2.81	2.844	0.284344	-2.202	6.93315	212.414	24.3601	-1598.1	624.764	624.764	1842.29	1416.76	1416.76	9.00343	1030.73	3137.6	5.46357	0.00797151
BN	2021-06-07	140.2	718508	278071	1822	0.566	491.39	15.82	1088.7	2.65	2.742	0.279026	-2.18656	7.03314	214.088	24.976	-1806.23	614.883	614.883	1727.93	1355.98	1355.98	8.99624	1031.94	3119.2	5.46336	0.00626882
BN	2021-07-12	0	718770	276935	2727	0.951	493.15	15.51	1054.1	2.65	2.796	0.27813	-2.16213	7.08307	216.74	26.2455	-2007.55	609.688	609.688	1674.26	1328.1	1328.1	9.22869	995.03	2969.29	5.46748	0.00929399
BN	2021-08-02	141.5	731714	264354	2354	0.685	481.28	15.88	1077.8	2.55	2.679	0.265398	-2.16241	7.10588	216.741	25.7908	-1736.23	609.314	609.314	1641.63	1303.23	1303.23	9.17725	1003.55	2951.11	5.46693	0.008033
BN	2021-09-01	141.6	724792	271194	2398	0.659	478.24	17.17	1117.5	2.68	2.838	0.272287	-2.1683	7.04935	216.083	25.7102	-1684.08	614.361	614.361	1706.75	1340.81	1340.81	9.09071	1017.06	3032.14	5.46558	0.00820858
BN	2021-10-04	141.9	717694	278473	2302	0.669	454	13.9	1060	2.565	2.684	0.279544	-2.18537	7.02077	214.216	25.0558	-1771.81	616.129	616.129	1741.7	1363.28	1363.28	9.15096	1007.33	3024.07	5.46661	0.00786128
BN	2021-11-02	142.2	735484	260602	2406	0.575	460	13.1	1030	2.628	2.597	0.261626	-2.14777	7.11624	218.35	26.4556	-1694.4	608.72	608.72	1627.56	1293.65	1293.65	9.29398	985.311	2865.02	5.46786	0.00819285
BN	2021-12-06	142	726138	270055	2325	0.552	452	14.2	1012	2.549	2.603	0.271087	-2.16014	7.14419	216.975	26.1082	-2082.64	604.441	604.441	1607.52	1289.18	1289.18	9.26337	989.782	2919.89	5.46772	0.00791961
BN	2022-01-03	142.3	720260	275610	2725	0.526	435	13	953	2.409	2.68	0.276753	-2.13376	7.18723	219.846	27.7824	-2670.31	599.16	599.16	1569.79	1272.93	1272.93	9.41628	965.579	2845.94	5.46788	0.00927865
Notes:
n.a. - not analyzed; n.m. - not measured
Data from Buono et al. (2023) and references therein
Equation (15) in Chapter 8 of the book was used to compute the CO equilibrium temperature
Equations (16) and (17) in Chapter 8 of the book were utilized to calculate the CH4 equilibrium temperature
The related H2O partial pressure was obtained by means of equations (18) and (19) in Chapter 8 of the book.
Equation (57) in Chapter 9 of the book was used to compute the H2S equilibrium temperature
Equations (23) and (24) in Chapter 8 of the book were utilized to calculate the related H2O partial pressure.
In all previous cases, the total fluid pressure was obtained by means of Eq. (135) in Chapter (4) of the book.
The CH4 concentration in the zone of H2S equilibration was calculated using equation (64) in Chapter 9 of the book.
